# Supplementary material for: A comparative analysis of polyomaviruses Large Tumor Antigens reveals evolution of different importin α-dependent nuclear localization signals
Source: Research Square preprint supplement (doi:10.21203/rs.3.rs-3325828/v1), 2023-09-07
Supplement: Supplementary file 1 [file ec55c00cc8cb5db57e8d7870.xlsx]

## Sheet: Supplementary Table_I
Genus	Scientific name	Host	Taxon Identifier	Proteome ID		UniprotKB	Sequence	Notes	NLS initial	NLS sequence	NLS score	Position
alphapolyomavirus	Acerodon celebensis polyomavirus 1	bat	1623684	UP000125865	>	A0A0D5ZYL4	MDKFMDRDELKELCELLQIPAHCYGNLPMMKINYKKMNKIYHPDKGGDAE 50 KMKRMNELWQKLQDGVCNARDEGPFSSSDDDGRSQSPSPGPSTGQSSRRP 100 SPPPQSQSSYSATPPKPKKRKTEHVPDDFPAVLHNFLSHAIYSNKTSSSF 150 LIYTTTEKGESLYSLIDKFKPEFKARFAYQEACILFIITAGKHRVSAIKN 200 FCATHCTVSFLICKAVIKPLECYQEMKSDPFKLVEENKPGLYMSDFAEGP 250 EKPGVDWNLLSEFAVANNLDDPLLIMGFYLDFSNEPDACTKCNQKKLKTH 300 YKFHPDHYKNALLFKECKTQKTVCQQASDVVQAKQRLKLVELTREELLTE 350 RFQMMLTKLEDVFGQ…		114	PPKPKKRKTE	15.5	SV40
alphapolyomavirus	Apodemus flavicollis polyomavirus 1	rodent	2170408		>	A0A2S1CJG4	MDRILSKEEKAQLLVLLDLEGQYWGDFGRMQKAYHAQSLKFHPDKGGDPV 50 LMQLLNTLWTKLKHGLHQVRIDLGSHEDVNPSTSRQPTGTFINPETGHYW 100 SYAYGSAGYSENQRKWWKEFFDKWDRDLYCSEELGSSDEDQPPPSSPISI 150 SSTPTPPGTPRTPRTPPPSPSPSPSMELEPSPPSRKRIYGDESSHHGGKY 200 IRRDSTSRGAHIPEYTANIPSTSAGASQSTFGSYYNSTEELETSEGEFQS 250 SQTTPKKPAPNRHTPDDMPPVLRSYISNAIYSNKTQNSFLIYTTGEKGSV 300 LYENIARYNPDYKGLFSYKGDSLLLIITPAKHRVNAVKSYCCRFCTVSFL 350 LCKAVTKPLECYNSM…	bipartite in SV40 position	183	PSRKRIYGDESSHHGGKYIRRD	7	SV40
alphapolyomavirus	Apodemus flavicollis polyomavirus 1	rodent	2170408		>	A0A2S1CJG4	MDRILSKEEKAQLLVLLDLEGQYWGDFGRMQKAYHAQSLKFHPDKGGDPV 50 LMQLLNTLWTKLKHGLHQVRIDLGSHEDVNPSTSRQPTGTFINPETGHYW 100 SYAYGSAGYSENQRKWWKEFFDKWDRDLYCSEELGSSDEDQPPPSSPISI 150 SSTPTPPGTPRTPRTPPPSPSPSPSMELEPSPPSRKRIYGDESSHHGGKY 200 IRRDSTSRGAHIPEYTANIPSTSAGASQSTFGSYYNSTEELETSEGEFQS 250 SQTTPKKPAPNRHTPDDMPPVLRSYISNAIYSNKTQNSFLIYTTGEKGSV 300 LYENIARYNPDYKGLFSYKGDSLLLIITPAKHRVNAVKSYCCRFCTVSFL 350 LCKAVTKPLECYNSM…		3	RILSKEEKAQLLVLLDLEGQYWGDFGRMQKAYHA	5.1	N-term
alphapolyomavirus	bat polyomavirus 3a-A1055	bat	2758134	UP000119958	>	J7HD79	MDKVLRKRERNLLLSLLELNSNCFSNFPLMKQAYKRASKRLHPDKGGNNE 50 KMMLLNSLWQKYQEELIELRNTQVYSEAYGSPSFKSRYREWASTVFTNEG 100 TSEGPDLHCHEPPDPASEEEEGGEAAPEPESSGYNSASFSAPFSSTPYPP 150 ASPTQENATSSRSQSPDYQSHADSSGTGGAEDVPSPERRSGGENVDGSYS 200 GSQASFASTPLKEKAKNLNSPTDIPSCLSEFVSHAVFSNKTVNSFITYTT 250 LEKAILLYDKVDKLKVEFKSVHKGEEETGTGFLFMLTNTKHRLSAIRNFC 300 SQFCTVSFVICKIVLKPLDCYKCICNNPFQEIKSNKILLSTDFDEGKEDG 350 CNWNKVTEFAVEADI…		34	YKRASKRLHPD	7	N-term
alphapolyomavirus	Artibeus planirostris polyomavirus 3	bat	1606499	UP000105356	>	J3TNZ7	MDKALNREESQELMQLLGLSMTLYGQLPMMRKAYLNKCKEYHPDKGGDEQ 50 KMKRMNELYKKLEDALSAASREETVWTSWASGECPTYGSAEWDAWWREFN 100 ADWEENLRCDEEMPDFDEDNTQSSQHTPPKKKFRRDAPSEFPEVLLEFLS 150 KAVFSNKCVSAFLIYTTKEKSVLLYRKVWDKFSSTFISRHSHGADKALLY 200 VLTPNKHRVSAINNFCKKFCSISFVLVKAIIKPFPCYCALGKEPFELLDE 250 SVPGGLTENVFMAEDCEEGQKQVNWKQISDYACAIKCDDVHLLMGLYLEF 300 EFPVESCGKCDKQVLPSHFKYHKDHLENAKLFAQCKNQKSICQQAVDAVI 350 AKKRVDQLVLTRKQM…		128	PPKKKFRRDAPSEF	11	SV40
alphapolyomavirus	Artibeus planirostris polyomavirus 3	bat	1606499	UP000105356	>	J3TNZ7	MDKALNREESQELMQLLGLSMTLYGQLPMMRKAYLNKCKEYHPDKGGDEQ 50 KMKRMNELYKKLEDALSAASREETVWTSWASGECPTYGSAEWDAWWREFN 100 ADWEENLRCDEEMPDFDEDNTQSSQHTPPKKKFRRDAPSEFPEVLLEFLS 150 KAVFSNKCVSAFLIYTTKEKSVLLYRKVWDKFSSTFISRHSHGADKALLY 200 VLTPNKHRVSAINNFCKKFCSISFVLVKAIIKPFPCYCALGKEPFELLDE 250 SVPGGLTENVFMAEDCEEGQKQVNWKQISDYACAIKCDDVHLLMGLYLEF 300 EFPVESCGKCDKQVLPSHFKYHKDHLENAKLFAQCKNQKSICQQAVDAVI 350 AKKRVDQLVLTRKQM…		30	MRKAYLNKCKEYHPDKGGDEQKMKRMNE	6.2	N-term
alphapolyomavirus	Ateles paniscus polyomavirus 1	monkey	1236391	UP000101015	>	K7QKH9	MDRFLTREEGMELMDLLKIPLSSYGNFSVMKFAYKKKSLEYHPDKGGDPE 50 KMARLNSLWSKLQEGVYQARQEFAAEHGPQHDVPSWCTGDVPPHGTREWD 100 AWWSAFNTEWDTMFDHLDDPNLFCNESSISSDSPRPNSPTETISGDPGEE 150 NSGKRRPSDPNCSQGSFSATPPKPKKSKNDYVPSDFPDGVRGFLSSAVYS 200 NKTVSAFLIYTTHEKAEFLYRKLDKFNPDFKSRHVFQEASLVFIMTPGKH 250 RVSAIRNFCLTHCTVSFLLCKAVIKQVECYRCLCEQPFKLIEESKAGIFE 300 YEFCEENGKPTCNWNLIAEFAVASRLDDPLLIMAHYLDFAFEPSVCTKCA 350 KKILKAHYNYHSLHH…		171	PPKPKKSKNDY	7	SV40
alphapolyomavirus	Callosciurus erythraeus polyomavirus 1	rodent	2721748		>	A0A6G9LUG9	MDRILEREERKKLVELLGIDPVLYGNIPVMKSAYKRASKVLHPDKGGTGN 50 DMMILNFLWQKFQEGVTEARCPEEFSSSYGSRSYREHYREWCSSVFTNES 100 TKEGPDLHCDESISEEEEDETQESGYNSFPFTSTPTPQASQGAPPFPENS 150 SSSSSFSGSRAPTDEGNTPKKRRRASADMDGSNSSSQASFASTPPKAKGE 200 DSDKPSDVPPCLHEYISHALFSNKTVNSFLLYSTVEKATLLYDKIDKFKV 250 EFKSLHSYDKGALLLILTAGKHRLTAIKNYCHTFCTVSFLVCKMVLKPLE 300 LYNCLCKDPFKEIKASKEALYSFDFDEKTKEEACNWNKVAEFAVQANIDD 350 PLLILAHYLDFAKPH…		168	TPKKRRRAS	11	SV40
alphapolyomavirus	Cardioderma cor polyomavirus 1	bat	1891718	UP000122341	>	L0GBA8	MDTALSAYDKLQLCELLGIPRHCYGNYPLMKSSYRQACLKHHPDKGGDDN 50 TMTLLNVLWGKFQTGVYEMRRQFPSFEEDDFEEEDLSPPYGTSQFRHWWA 100 KQQHHGTKSAAHARTSGNRRRKPSSPHSGTGGGSEGTSTGYSSASQTSNA 150 TADTDRTNIPPSAANDETPGSSSTSSRFTFPNPKSSNTRGYRGGNIFGDS 200 SRGPQPNWDDSLYCDESLSPEPPTPTEDEAFSESFSETPFSETSSQRTGS 250 AFTETASQSTDESFSMPSSPPRRRKRNTSPAPSYSSTPPKPKKNRENAPP 300 DDFPVDFTEYLSHAVYSNKTLSAFAIYTTQEKGKLFYSKLESKFKVEFKS 350 RHKVNNGCILLVITL…	no NLS found by cNLS mapper; visual inspection found bipartite in SV40 position		/		/
alphapolyomavirus	Carollia perspicillata polyomavirus 1	bat	1606502	UP000105239	>	J3Z5R0	MDRALSSEEKRQLCRLLGIARHCYGNYTLMKAHFRSACLKYHPDKGGDQE 50 KMSELNALWQKFLAYSLELRRDIPEDDQEQQQGQQQSQQSTNCEYNAEQH 100 QQQQQQQKRPHHSSSSNASRSDIPPPHGSGFSGGNIYGNSSRVPPPWDDD 150 SLLCEESLSSSPSPEPAPTSTEEEPEPSFSESSSFRGPSGTPSQSTDDDF 200 SMPRSPPPRKRRATSPPSSYSSTPPRPKKNKHTPNPSDFPDDLLDFLSHA 250 VYSNKTLSAFAIFTTPEKGKFLYEKLEQKFKVEYKGRFACKDGCILLILT 300 LTKHRVSAVKNFIAPFCTVSFLIVKGVNKLMDIYAHLGNPPYRLVEENKT 350 LFGYEFGEKKDVTCN…	visual inspection found bipartite in SV40 position	206	PPPRKRRATSP	19	SV40
alphapolyomavirus	Carollia perspicillata polyomavirus 1	bat	1606502	UP000105239	>	J3Z5R0	MDRALSSEEKRQLCRLLGIARHCYGNYTLMKAHFRSACLKYHPDKGGDQE 50 KMSELNALWQKFLAYSLELRRDIPEDDQEQQQGQQQSQQSTNCEYNAEQH 100 QQQQQQQKRPHHSSSSNASRSDIPPPHGSGFSGGNIYGNSSRVPPPWDDD 150 SLLCEESLSSSPSPEPAPTSTEEEPEPSFSESSSFRGPSGTPSQSTDDDF 200 SMPRSPPPRKRRATSPPSSYSSTPPRPKKNKHTPNPSDFPDDLLDFLSHA 250 VYSNKTLSAFAIFTTPEKGKFLYEKLEQKFKVEYKGRFACKDGCILLILT 300 LTKHRVSAVKNFIAPFCTVSFLIVKGVNKLMDIYAHLGNPPYRLVEENKT 350 LFGYEFGEKKDVTCN…	visual inspection found bipartite in SV40 position	224	PPRPKKNKHT	5	SV40
alphapolyomavirus	Chlorocebus pygerythrus polyomavirus 1	monkey	1891719	UP000146010	>	L0MYY5	MERVLQKSEKTQLMELLGIPSYAFGNFPIMKTAYKRASKSLHPDKGGSTE 50 KMKLLNSLWQKFQEGFIELRNSESFSDCYGSQSFRRRYASWCSSVFTNEG 100 PEKGADLHCNESPISSSDEDEPSTSSTSWRESSSQSSGYNSFPYTSTPTS 150 ASQDECSAPFSEPEQSETPSSSGTGSSGHEGETPEKRRRSNEDVDGSNSS 200 SQASFASTPPKPKKAGFDIPTDLPSCLFDFVSHAVFSNKTVNAFILYSTL 250 EKANELYDKIDKFKVEFKSLHKFTEVSHAGGGLVLFLTTGRHRLSAIKNF 300 CQNFCTVSFLICKVVLKPLECYNCLCKLPFVEIKANKIGLCSFDFDDNAK 350 EESCNWNKVAEFAVA…	visual inspection found bipartite in SV40 position	182	ETPEKRRRSNE	6	SV40
alphapolyomavirus	Chlorocebus pygerythrus polyomavirus 3	monkey	1891720	UP000109318	>	L0N2E1	MDQTLSKEERNELMDLLQITRAAWGNLSMMKKAYKNVSKLYHPDKGGDPA 50 KMQRLNELFQRVQVTLMEIRSQCGSSSSQGYFSEDFYFGPTTFQYSPMDP 100 DAVREDLPNPGEGSWGKWWREFVNRQCCDDLFCSETMSSSSDEDTPPAAQ 150 PPPPPAPSPEEDEIEFVEETPSSCEGSSSQSSYTCTPPKRKKTEEKKPDD 200 FPVCLYSFLSHAIYSNKTMNSFLIYTTLEKARQLYKTVEKSKIVVDFKAS 250 FSYQDEEGEGCLLFLITLGKHRVSAVKHFCVSQCTFSFIHCKAVVKPLEL 300 YKTLSKPPFKLLEENKPGVSMFEFQEEKEQSVNWQEVCNFANEANISDVL 350 LLLGIYIDFAVEPGK…		186	TPPKRKKTEE	8	SV40
alphapolyomavirus	Bat polyomavirus 5a	bat	1623687	UP000150102	>	A0A0D5ZYM7	MDKFMDREELKELCELLNIPAHCYGNLPMMKINYKKMCLIYHPDKGGDVA 50 KMQRMNELWQKLQDGVINARDEGPFLSSDDDGESQNTSPGPSSRRNSRRP 100 SPDYPSHSQSSFNATPPKPKKRKTDNVPTDFPPCLHPFLSHAIYSNKTCS 150 AFLIYTTTEKGESLYNLLDKFKPEFKARFSFNEAAIVFILTPGKHRVSAI 200 KNFCSTQCTVSFLICKAIIKPLECYQEMKNEPFKLIEENKPGLFTHEFSE 250 GPEKPGVDWNLLSEFAVENNLDDCLLLMGFYLDFANDPEMCIKCIQKKLK 300 THYKYHEQHYKNAVLFKECKTQKTVCQQATDIVQAKQRLKLLELTREELL 350 TERFKKCIDQLEEKF…		116	PPKPKKRKTD	16.5	SV40
alphapolyomavirus	Eidolon helvum polyomavirus 1	bat	1891722	UP000116224	>	L0GBB5	MDTALTRVEKKKLCFLLDLPPQCYGNVPMMKSRYKRACLKLHPDKGGEDL 50 LMKELNMLWQKFQEGIFNLRRDIPSFEEDEEDEEEDDTPIYGTPKFKAWW 100 YSKYARWSQGSNDSSSSKSSSRRSSGRARPDSGYSSSQQDSDPSAFPSSQ 150 ASNSSDGQSQQRESAQHPGGASVPPEGFQSSHAGHHNGSGSEESSSGRGS 200 QERPTGDAPTGKQRWRGGNLFGNSSRVPPPNWDDSLRCDESLSSPEVSAG 250 EEDPPTGSESSSQYPQDSTTEEATEPEEQPEEHQHAGPSSSSFSTPRTPP 300 SRRRKFTRPQGFPRSPDADSYSSTPPRPKKPKENDLPNDFPPDTLDYLSH 350 AVYSNKTVTTFAIYT…		30	MKSRYKRACLK	6	N-term
alphapolyomavirus	Gorilla gorilla gorilla polyomavirus 1	monkey	928214	UP000149850	>	E5LA65	MDAVLNRKERDTLCNLLEIPHHCFGNIPMMKAAFKKSCLKHHPDKGGNPV 50 IMMELNTLWSKFQRNIHKLRSEFTIFDEVDEAPIYGTAKFKEWWHSGGYG 100 FGKAYEAGPGPRKPTSHASRGTSGGTSPPTCSQSSSSGYGSFSASQTSDA 150 ESRGTSVPSQHSAETSDGTETTSPRREPGTQPRTSVPRGSSRSDGTWDDL 200 FCDESISSPEPPSSSEEPEEPPFSARSSPQQPPSSSAEEASSSQFTDEEC 250 RASFTSPKTPPPSRKRKFGGSRSSASSASSASFTSTPPKPKKNRETPVPT 300 DFPLDLSDFLSHAVYSNKTVSAFAIYTTSDKAIELYDKIDKFKVDFKSRH 350 ANELGCILLFITLSK…	visual inspection found bipartite in SV40 position	261	PPPSRKRKFGGS	15	SV40
alphapolyomavirus	Gorilla gorilla gorilla polyomavirus 1	monkey	928214	UP000149850	>	E5LA65	MDAVLNRKERDTLCNLLEIPHHCFGNIPMMKAAFKKSCLKHHPDKGGNPV 50 IMMELNTLWSKFQRNIHKLRSEFTIFDEVDEAPIYGTAKFKEWWHSGGYG 100 FGKAYEAGPGPRKPTSHASRGTSGGTSPPTCSQSSSSGYGSFSASQTSDA 150 ESRGTSVPSQHSAETSDGTETTSPRREPGTQPRTSVPRGSSRSDGTWDDL 200 FCDESISSPEPPSSSEEPEEPPFSARSSPQQPPSSSAEEASSSQFTDEEC 250 RASFTSPKTPPPSRKRKFGGSRSSASSASSASFTSTPPKPKKNRETPVPT 300 DFPLDLSDFLSHAVYSNKTVSAFAIYTTSDKAIELYDKIDKFKVDFKSRH 350 ANELGCILLFITLSK…	visual inspection found bipartite in SV40 position	716	ELRKRRILQS	5	C-term
alphapolyomavirus	Hamster polyomavirus	rodent	1891729	UP000008477	>	LT_POVHA	MDRILTKEEKQALISLLDLEPQYWGDYGRMQKCYKKKCLQLHPDKGGNEE 50 LMQQLNTLWTKLKDGLYRVRLLLGPSQDPNASTSTSRPGEFYNPDTGGYW 100 SYSYGSAGYSDQQKKYWEEFFSKWDVNEDLTCQEELSSSEDEFTPWHPNP 150 PPSPVSISSDSSSSSCDEEYPRNSSRKRKRVHANGSPNTPIQPNKRAHTP 200 GGGRTTIRGDTDIPRTPARESQSTFGSYFNSTEELEEEISQTQQSHHNTT 250 PKKPPPTVSPDDFPTILRGFLSHAIFSNKTQNAFIIYSTKEKCEVLYEQI 300 DKYNPDYKGIFIMKQTEAFVMFMTPGKHRVAAVKSYCCKFCTVSFLLCKA 350 VTKPLELYNCVAKCD…		174	SSRKRKRVH	11	SV40
alphapolyomavirus	Hamster polyomavirus	rodent	1891729	UP000008477	>	LT_POVHA	MDRILTKEEKQALISLLDLEPQYWGDYGRMQKCYKKKCLQLHPDKGGNEE 50 LMQQLNTLWTKLKDGLYRVRLLLGPSQDPNASTSTSRPGEFYNPDTGGYW 100 SYSYGSAGYSDQQKKYWEEFFSKWDVNEDLTCQEELSSSEDEFTPWHPNP 150 PPSPVSISSDSSSSSCDEEYPRNSSRKRKRVHANGSPNTPIQPNKRAHTP 200 GGGRTTIRGDTDIPRTPARESQSTFGSYFNSTEELEEEISQTQQSHHNTT 250 PKKPPPTVSPDDFPTILRGFLSHAIFSNKTQNAFIIYSTKEKCEVLYEQI 300 DKYNPDYKGIFIMKQTEAFVMFMTPGKHRVAAVKSYCCKFCTVSFLLCKA 350 VTKPLELYNCVAKCD…		3	RILTKEEKQALISLLDLEPQYWGDYGRMQKCYKKK	7.3	N-term
alphapolyomavirus	Human polyomavirus 12	human	1303334	UP000158017	>	M4STH5	MDSILTFAERQLLISLLKISGDTFGNVPAMARAYKLAAKRLHPDKGGNEA 50 EMKKLNELWNKFKDGIYNLREYNPHRNPSGNPCGSFFWFRRFQSDLFADE 100 TLSSTSSDEEPEPAQRKRGTGANIHESASRTSFSTGSPGKGTRGGGGIPR 150 DAPPPDSGYGSFPFDSTPPKRGRNGGGSAPSTSGGVPDDFEGDSADQNCS 200 QATPPKSKKAKMDNGPSDFPCDINIFLSSAVYSNKTVNAFLIFTTVEKCQ 250 LLYQKIDVKFKIDFKSRHEGENKAHGYLYILTVAKHRVSAVKNYCAKQCT 300 ISFLHCKAINKPFDCYKALCCDPYKRIESNKDLFQTDFENENSQQVDWTL 350 ISTFAECNMIDDPYL…	visual inspection found bipartite in SV40 position	204	PPKSKKAKMD	10.5	SV40
alphapolyomavirus	Human polyomavirus 12	human	1303334	UP000158017	>	M4STH5	MDSILTFAERQLLISLLKISGDTFGNVPAMARAYKLAAKRLHPDKGGNEA 50 EMKKLNELWNKFKDGIYNLREYNPHRNPSGNPCGSFFWFRRFQSDLFADE 100 TLSSTSSDEEPEPAQRKRGTGANIHESASRTSFSTGSPGKGTRGGGGIPR 150 DAPPPDSGYGSFPFDSTPPKRGRNGGGSAPSTSGGVPDDFEGDSADQNCS 200 QATPPKSKKAKMDNGPSDFPCDINIFLSSAVYSNKTVNAFLIFTTVEKCQ 250 LLYQKIDVKFKIDFKSRHEGENKAHGYLYILTVAKHRVSAVKNYCAKQCT 300 ISFLHCKAINKPFDCYKALCCDPYKRIESNKDLFQTDFENENSQQVDWTL 350 ISTFAECNMIDDPYL…	visual inspection found bipartite in SV40 position	32	RAYKLAAKRLHPDKGGNEAEMKKLNE	5	N-term
alphapolyomavirus	New Jersey polyomavirus-2013	human	1497391	UP000145802	>	A0A024B6C0	MEKVLEKSDKEMLIELLGIPRYAYGNFPIMKTAYKRASKIYHPDKGGSSE 50 KMMLLNSLWQKFQEGLIEVRDSEVFSDSYGSANFRKRYASWCSSVFTNEK 100 SDSRADLHCDESPISSSSDEEDETQSSGYNSFPFTSTPTPSTSTASQEVP 150 PPFSEPQFPESSSASGSSSAGRNTETERESPPKRRRGTEDLDGSYTDSQT 200 SFASTPPKQKRKSPDSPSDLPSCLFDFVSHAIFSNKTVNAFILYSTLEKA 250 SLLYEKIDKFKIEFKSLHKLTEGANVGGGLVLVMTIAKHRVSAMKNFCQQ 300 FCTVSFLICKVVLKPLECYQCLCKPPFSQVKANKDGLFSYDFEDKKEENC 350 NWNKVAEFAVLADID…	visual inspection found bipartite in SV40 position	178	RESPPKRRRGT	10.5	SV40
alphapolyomavirus	New Jersey polyomavirus-2013	human	1497391	UP000145802	>	A0A024B6C0	MEKVLEKSDKEMLIELLGIPRYAYGNFPIMKTAYKRASKIYHPDKGGSSE 50 KMMLLNSLWQKFQEGLIEVRDSEVFSDSYGSANFRKRYASWCSSVFTNEK 100 SDSRADLHCDESPISSSSDEEDETQSSGYNSFPFTSTPTPSTSTASQEVP 150 PPFSEPQFPESSSASGSSSAGRNTETERESPPKRRRGTEDLDGSYTDSQT 200 SFASTPPKQKRKSPDSPSDLPSCLFDFVSHAIFSNKTVNAFILYSTLEKA 250 SLLYEKIDKFKIEFKSLHKLTEGANVGGGLVLVMTIAKHRVSAMKNFCQQ 300 FCTVSFLICKVVLKPLECYQCLCKPPFSQVKANKDGLFSYDFEDKKEENC 350 NWNKVAEFAVLADID…	visual inspection found bipartite in SV40 position	206	PPKQKRKSPDS	6	SV40
alphapolyomavirus	LI polyomavirus	human	1965344	UP000202361	>	A0A1U9VWR9	MDAVLTTPERRQLCLLLDISPQEYGNIPLMKNAFKKACLKHHPDKGGDPV 50 LMMQLNSLWGKFTTSLTEARASTYQDDPIYGTPQFRAWWYRKHYGFFPDG 100 FDPRRSSSTRNRRPGGTEEPEYEQPSTSGPNLSTPRPKKSRSNLFGSSGC 150 RSRSTAQNPLFCDESLSSSEEEAENASAKSQSDHFSFTSQEESSQASAPS 200 FTSNESTPASTPKRNRKNQSFGGIPSPGSRRSFSSTPPKQKRYKEGDDPI 250 DFPNCLSEFLSHATLSNKTYSCFLIFTTAEKGELLYNKVSEKYKVEFKSL 300 HNYRGGTALLFLVLLTRHRVTAIKNFACTFCSVSFLLCKAVIKSPELYSC 350 LIKEPFCLLKENKPG…	visual inspection found 3 different NLSs in SV40, potentially also a bipartite one		/		/
alphapolyomavirus	Merkel cell polyomavirus	human	493803	UP000154903	>	B6DVW7	MDLVLNRKEREALCKLLEIAPNCYGNIPLMKAAFKRSCLKHHPDKGGNPV 50 IMMELNTLWSKFQQNIHKLRSDFSMFDEVDEAPIYGTTKFKEWWRSGGFS 100 FGKAYEYGPNPHGTNSRSRKPSSNASRGAPSGSSPPHSQSSSSGYGSFSA 150 SQASDSQSRGPDIPPEHHEEPTSSSGSSSREETTNSGRESSTPNGTSVPR 200 NSSRTDGTWEDLFCDESLSSPEPPSSSEEPEEPPSSRSSPRQPPSSSAEE 250 ASSSQFTDEEYRSSSFTTPKTPPPFSRKRKFGGSRSSASSASSASFTSTP 300 PKPKKNRETPVPTDFPIDLSDYLSHAVYSNKTVSCFAIYTTSDKAIELYD 350 KIEKFKVDFKSRHAC…	visual inspection found additional cNLS and bipartite in SV40 position	274	PFSRKRKFGGS	10	SV40
alphapolyomavirus	Trichodysplasia spinulosa-associated polyomavirus	human	862909	UP000172995	>	E2ESL8	MDKFLSREESLELMDLLQIPRHCYGNFALMKINHKKMSLKYHPDKGGDPE 50 KMSRLNQLWQKLQEGIYNARQEFPTSFSSQHDVPTQDGRDIPPYGHPSWA 100 SWWESFNQEWDNLFDTMQDPDLFCHESTIPSDESRSPSPTPGPSTQFSEE 150 NSRRRRAAPPEDSPGCTQSSFSATPPKPKKSKYDSVPNDFPDMLRPFLSN 200 AVYSNKTLSSFLIYTTNEKAEYLYKKLDKFNPEFKSRHSFQEGSMVFLMT 250 PGKHRVSAIKNLCVTHCTVSFLLCKAVIKQVECYRCMCSEPFKLLEESKP 300 GIFEYEFNEENGKPVVNWNLLTDFAVTNRLDDPLLIMAHYLDFAEEPSIC 350 SKCTKKALKAHYNYH…		175	PPKPKKSKYD	9.5	SV40
alphapolyomavirus	Human polyomavirus 9	human	943908	UP000163738	>	E9NQ91	MDQTLSLEERNELMDLLQLTRAAWGNLSLMKKAYKTVSKIYHPDKGGNPE 50 KMQRLNELFQKLQVTLLEIRSNCGSSSSQGYYSDSPYFTETPFSYCERKN 100 EDPEGGSWGKWWREFVNKEYDDLFCSETISSSDDENNPGPSAPPPSSASA 150 SEDPDPEEEAGSSQSSFTCTPPKRKKPEPNTPEDFPMCLYSFLSHAIYSN 200 KTMNCFLIYTTVEKSKQLYRTVEKSKIKVDFKAIFLYKDDGIEGGLLYFI 250 TLGKHRVSAVKHFCVAQCTFSFIHCKAVIKPLELYRALGKPPFKLLEENK 300 PGVSMFDFQEEKEQAVNWQEICNYAVEAKITDVLLLLGIYLDFAVEPGTC 350 SKCEKKSHKFHYNYH…		170	TPPKRKKPEP	8	SV40
alphapolyomavirus	Macaca fascicularis polyomavirus 1	monkey	1236398	UP000102806	>	K7QJ84	MDQILSQEERYELMDLLQITRAAWGNLSLMKKAYKTVSKLYHPDKGGDST 50 KMQRLNELFQRVQVTLLEIRSDSGTSSSQGYYSESPSFMRTPFAYCPEEN 100 QDADSSGSWGKWWRDYVNKECCNDLFCTETMSSSSDEENGPPPPPPPTEE 150 EDEIEEVPETPHTSTQSQSQSQSQSFEETPSSQNSFTCTPPKRRKSDEKK 200 PEDFPVCLYAFLSHAIYSNKTMNSFLIYTTLEKSRQLYKTVEKSKIKVDF 250 KASFSYKDEEGEGSLLFLITLGKHRVSAVKHFCVSQCTLSFIHCKGVVKP 300 LELYKALGKPPFKLLEENKPGVSMFDFQEEKEQSVNWQEICNFASEAKIS 350 DVLLLLGIYIDFAVE…		189	TPPKRRKSDE	9	SV40
alphapolyomavirus	Mastomys natalensis polyomavirus 2	rodent	2182467		>	A0A2S1CJM2	MDKILTAEEKQILISLLELDPQYWGDYGRMQKCYKKKCLQLHPDKGGDGQ 50 LMQQLNTLWTKLKDGLYRVRLLLGPSQDNPSTSSTRPGEFFNPATGGYWS 100 YAYGSAGYSETQKKYWEEFFAKWDVSEDDLYCEEELPSSDEESTWHPHSP 150 PSPISIPSDSSEESITITSSRKRKRVHANGSPEIPAPKRACSPLPPGGGD 200 SVRGDTGSNVPRTPARESQGTFGSYFNNTEDLEEISQTQQSYHNTTPKKP 250 PPRVSPDDFPTILRGYLSHAIFSNKTQNAFMIYSTKEKCEVLYEQVDKYN 300 PEYKGLILMKGTEAFVFFISAGKHRVTAVKSYCCKFCTVSFLLCKAVTKP 350 LELYNCVSKQDDFEI…		169	SSRKRKRVH	11	SV40
alphapolyomavirus	Mastomys natalensis polyomavirus 2	rodent	2182467		>	A0A2S1CJM2	MDKILTAEEKQILISLLELDPQYWGDYGRMQKCYKKKCLQLHPDKGGDGQ 50 LMQQLNTLWTKLKDGLYRVRLLLGPSQDNPSTSSTRPGEFFNPATGGYWS 100 YAYGSAGYSETQKKYWEEFFAKWDVSEDDLYCEEELPSSDEESTWHPHSP 150 PSPISIPSDSSEESITITSSRKRKRVHANGSPEIPAPKRACSPLPPGGGD 200 SVRGDTGSNVPRTPARESQGTFGSYFNNTEDLEEISQTQQSYHNTTPKKP 250 PPRVSPDDFPTILRGYLSHAIFSNKTQNAFMIYSTKEKCEVLYEQVDKYN 300 PEYKGLILMKGTEAFVFFISAGKHRVTAVKSYCCKFCTVSFLLCKAVTKP 350 LELYNCVSKQDDFEI…		30	MQKCYKKKCLQ	5.5	N-term
alphapolyomavirus	Mastomys natalensis polyomavirus 3	rodent	2662314		>	A0A5P9NRD9	MDRVLSREEKKTLLGLLNLPPEFWGDFGRMQQAYKQQSLLLHPDKGGSHE 50 AMQTLNSLWSKFKTEVFNLRMNLQGTGFQASNPRTSGSSPSKTSHSPFPD 100 DYWSFSYGSKYFREEWNEFFRKWDPEYKSPPHETTESGQPDLYCYEEVLS 150 SPSPPESPPRKRRRNPAVAEMDESISPASPKTPENPSQPRDEGVQRGSGG 200 RGGGGVYGDGEPHRGSVSGGPSRCTSTPAAPNGPFPQFAQSQNTTMASDS 250 SGFAEGSDGSYFTKEPSSETGDTEGCSQSSFHTTPPKKVRENPAPTDFPG 300 CLNSYLSHAIYSNKTFSAFIIYSTKEKCKELYDKIQKFKPEFKCIVHYEE 350 GGMLFFMSMGKHRVS…		158	PPRKRRRNP	20	SV40
alphapolyomavirus	Miniopterus schreibersii polyomavirus 1	bat	1904408	UP000204093	>	A0A1S7J005	MDRLLEKKEREQLVELLEVHPQAFYNVPIMKTAFKKACKKWHPDKGGDTT 50 KMTLLNSLWQRYQQGVIGLRSSQVYSDAYGSPSFKEKYRAWASGVFTHEG 100 SQPEPDLHCDESCDSDSGESTESPPQSSGYNSFTPGGGFSASTSTPEEDP 150 TPPFGEPSFSQASSHASSSNGSRDPREEPSPKRARYGENVDGSCPSSQAS 200 FASTPPKEKAKMGDSPTDLPSCLFEYISHAVFTNKTFNNFIVFSTLEKVT 250 LLYEKCDFLKIEFKSLHKIEEGPHAGTGLLLLLTTAKHRVTAVKNHCSKF 300 CTVSFLVTKIVLKPLEIYRCLCQLPFKELKCNKVLCSADFDESKEESCSW 350 AKVAEFAVEAQLEDP…	visual inspection found additional cNLS and bipartite in SV40 position	179	PSPKRARYG	9	SV40
alphapolyomavirus	Miniopterus schreibersii polyomavirus 2	bat	1904409	UP000201300	>	A0A1S7J022	MDRLLERDERKQLVQLLEVTPQAYYNVSLMRTAFKRVCRKLHPDKGGDPR 50 QMTLLNSLWQRYQEGVIRLRTTQVYSDAYGSSAFRERYTAWASGVFTNER 100 PRPEPDLHCDESCDSSSSEETPSSSQAPSSGYNSYSFDSGCRFSTSTPTP 150 EDEVPPPSFGQSSFSQTSSQSSNGGSGEPGEEPSPKRARSSDHVDGSCPS 200 SQASFASTPPKEKAKMGDGPTDIPSCLFDYISHAIFTNKTFNSFIVFSTL 250 EKVTLLYEKCEMLKIEFKSLHSIEQGVHAGTGLLLILTSAKHRVSAVKNH 300 CAKFCTVSFLVVRVVLKPLDLYKALSQVPFKELKSNKVLCSADFDDSKEE 350 SCSWAKVAEFAVDAG…	visual inspection found additional cNLS and bipartite in SV40 position	183	PSPKRARSS	7	SV40
alphapolyomavirus	Molossus molossus polyomavirus 1	bat	1606504	UP000129166	>	J3ZGP5	MERMLEKEEKNQLLGLLELEPNCFFNFPIMRQAYKRASKKLHPDKGGDSE 50 KMQLLNALWHKYREGVVELRNTQVFSDAYGTPSFKSRYAEWARGVYTDER 100 PETRPDLYCDESPASSDSEEEDHTVPSSGYNSFPFNSTFATPSTSQEESS 150 SAFSESEQSKVSSPRSRSRDPQDESPPKRRRDGEDLDGSHPSSQASFAST 200 PPKTKTKVPDSPTDIPSCLYDFVSHAVFSNKTVNSFLIYSTLEKASPLYD 250 KVEKFNVEFKSLHKWEETGGGFLFILTSAKHRLSAVKNFCNTFCTVSLLI 300 CKIVLKPLECHRCLQKEPFAEIKSNKLLLSSDFDEGKEETCNWNKVADFA 350 VEADLDDPLLILAHY…		174	ESPPKRRRDGE	12	SV40
alphapolyomavirus	Molossus molossus polyomavirus 1	bat	1606504	UP000129166	>	J3ZGP5	MERMLEKEEKNQLLGLLELEPNCFFNFPIMRQAYKRASKKLHPDKGGDSE 50 KMQLLNALWHKYREGVVELRNTQVFSDAYGTPSFKSRYAEWARGVYTDER 100 PETRPDLYCDESPASSDSEEEDHTVPSSGYNSFPFNSTFATPSTSQEESS 150 SAFSESEQSKVSSPRSRSRDPQDESPPKRRRDGEDLDGSHPSSQASFAST 200 PPKTKTKVPDSPTDIPSCLYDFVSHAVFSNKTVNSFLIYSTLEKASPLYD 250 KVEKFNVEFKSLHKWEETGGGFLFILTSAKHRLSAVKNFCNTFCTVSLLI 300 CKIVLKPLECHRCLQKEPFAEIKSNKLLLSSDFDEGKEETCNWNKVADFA 350 VEADLDDPLLILAHY…		34	YKRASKKLHPD	5.5	N-term
alphapolyomavirus	Murine polyomavirus (strain BG) (MPyV)	rodent	179241	UP000116380	>	P0DOJ4	MDRVLSRADKERLLELLKLPRQLWGDFGRMQQAYKQQSLLLHPDKGGSHA 50 LMQELNSLWGTFKTEVYNLRMNLGGTGFQGSPPRTAERGTEESGHSPLHD 100 DYWSFSYGSKYFTREWNDFFRKWDPSYQSPPKTAESSEQPDLFCYEEPLL 150 SPNPSSPTDTPAHTAGRRRNPCVAEPDDSISPDPPRTPVSRKRPRPAGAT 200 GGGGGGVHANGGSVFGHPTGGTSTPAHPPPYHSQGGSESMGGSDSSGFAE 250 GSFRSDPRCESENESYSQSCSQSSFNATPPKKAREDPAPSDFPSSLTGYL 300 SHAIYSNKTFPAFLVYSTKEKCKQLYDTIGKFRPEFKCLVHYEEGGMLFF 350 LTMTKHRVSAVKNYC…	visual inspection found additional cNLS and bipartite in SV40 position	188	PVSRKRPRPA	8	SV40
alphapolyomavirus	Otomops polyomavirus KY157	bat	2035999	UP000141952	>	L0GAL1	MDSALTSAEKKQLCSLLQIPRHCYGNFPLMKSSFKTACLRNHPDKGGDPE 50 VMKELTCLWQKFSCSVYEMRRHFPTYDEEDDDEDTPLYGTSAFRTWWGRK 100 QHGHRRTETTSSSRRGEPSHTGDSSGYGSSQQSQGSSEFSEPSNSRNPSR 150 EDIPSSSSTKFKGGNLFGNSARCAPPPSPWDDESLRCDETLSSPEPPSTE 200 EEPFSESSERTTFTSTQSDEDPFSTPRSPPHPHRRRRPAGSPTPSYSSTP 250 PKPKKPKDSPHPSDFPTDCSDYLSHAIYSNKTMSSFAIFTTREKGKFFYN 300 KIDGKFKVEYKGRFSFKEGSILLILTCGKHRVTAIKNFLQPFCTVSFLVV 350 KGVIKLLDLYRHLGG…	visual inspection found additional cNLS and bipartite in SV40 position	250	PPKPKKPKDS	6.5	SV40
alphapolyomavirus	Otomops polyomavirus KY156	bat	2035998	UP000113604	>	L0GBA5	MDRLFEKSEKDKLLQMLGVGSNCFCNFPLMKQAYKKASKKFHPDKGGNNE 50 QMMLLNSLWQKYQEGIIDMRNSEVFSDAYGTPSFRQRYAESWTGVPTHEG 100 PRRASDLYCDESCSSGDESPSSPGEPDYNSAGTSGYNSYPFSSTPFSSTP 150 CPPSTSASQEESSSSFSESQHTHSENSTTSGERGGRDEAHSPEKRRRAGE 200 NLDGSNPSSQASFASTPPKGKTKNPDSPTDLPSCLFDFVSHAVFSNKTVN 250 SFIIYSTFEKAALLYEKVDKLKIEFKSLHRWEETGSGLLVLLTITKHRLS 300 AVKNFCQTFCTVSFLICKILLKPLDCYRYICKAPFKEVKANKILLSTDFD 350 DGKEEACNWNKVAEF…	visual inspection found additional cNLS and bipartite in SV40 position	191	SPEKRRRAGE	8	SV40
alphapolyomavirus	Chimpanzee polyomavirus Bob	monkey	2035845	UP000154291	>	E5AX31	MDKVLEKSDREMLIELLGIPSYAFGNFPIMKTAYKRASKIYHPDKGGSSE 50 KMMLLNSLWQKFQEGLVDIRGSEGRNTETERESPPKRRRSPEDLDGSYTD 100 SQASFASTPPKQKRQNPDSPSDLPSCLFDFVSHAIFSNKTVNAFILYSNF 150 EKASLLFEKIDKFKIEFKSLHKLIEGMAIGGGLVLVMTSGKHRLSAVKNY 200 CQQFCTISFLIIKAVLKPLECYQCLCKPPFAQIKANKDGLFSYDFEDRKE 250 ENCNWNKVAEFAVAADLDDALLILAHYLDFAQPFPCVKCENQKTKAHDFH 300 KAHHENAVLFEMCKSQRSICNQASDVVLAKRRLLLQESSREELLAMCFQK 350 QLKALKALDTLDIYD…	visual inspection found additional cNLS and bipartite in SV40 position	82	ESPPKRRRSPE	10	SV40
alphapolyomavirus	Pan troglodytes verus polyomavirus 1a	monkey	928211	UP000157490	>	E5LA35	MDSVLSRKEKETLCNLLEIPPHCFGNIPLMKAAFKKSCLKHHPDKGGNPV 50 IMMELNTLWSKLQQNIHRLRSEFSIYDEVDEPPIYGTAKFKQWFFAGGYG 100 FGKAYTCGRPRKPSSNASGGTSSDRTSPPCSQSSSSGYGSGSFSSSQTSD 150 SQSRGPNLSSEQSAESTASTSAETTDSRRESSTPCGASVPGSSSRSSSTW 200 DDLYCDESISSPEPPSSSEEPEEPPCSRGSPQQPPHSSAEEASSSQFTDE 250 ECRGSSFTSPKTPPPFSRKRKFGGYRSSASSASSASFSSTPPKPKKNRET 300 PVPTDFPFDLLDYLSHAIYSNKTVSCFAIYTTTEKAVELYEKIERFKVEF 350 KSRHACELGCILLVM…	visual inspection found additional cNLS and bipartite in SV40 position	265	PFSRKRKFGGY	10	SV40
alphapolyomavirus	Pan troglodytes polyomavirus 3	monkey	1891735	UP000131605	>	E5LA45	MDGVLNRKERETLCNLLEIPPHCFGNLPMMKAAFKKSCLKHHPDKGGNPV 50 IMMELNTLWSKLQRNIHKLRNEFSLFDEVDETPIYGTARFKEWWHSGQYG 100 FGKAYPGPGPRKPSSTASGGTSTDRASPPSCSQSSSSGYGSFSASQASDT 150 ESRGASVPPQYSDDTSDATETTNSGRESSTQHGTSVPRGSSRSDGTWDDL 200 FCDESISSPEPPSSSEEPEEPPSSSRSSPQQPPSSSTEEASSSQFTDEEY 250 RAPPFTSPKTPPPFSRKRKFGGSRSSASSASSASFTSTPPKPKKNRETPV 300 PTDFPVDLSDYLSHAVYSNKTVSCFAIYTTPDKAVELYEKIDKFKVDFKS 350 RHACDLGCILLFITL…	visual inspection found additional cNLS and bipartite in SV40 position	263	PFSRKRKFGGS	10	SV40
alphapolyomavirus	Pan troglodytes polyomavirus 4	monkey	1891736	UP000156881	>	K7QJ79	MDQILSRSQRKELISLLDLPPDEYGNYPLMKHQFKKMCLVYHPDKGGDGE 50 KMRKLNSLWQLFNNQLLEMRDNRFDMQQDESPIYGTPQFKEWWYAQFSPS 100 PPKYQRTSTNDRRGGGPDIHCDEVLESSDEEGPSTSTQTSFKRRRKTPHS 150 SSSQDFFSSTPKTSESSSSSYARDSGRDSTCSSDFTPNFTPPPSQCSPPK 200 PPREGDSNASQASFTSTPPKTKGSKVHNDPVDFPNSLSDYLSHAIYSNKT 250 LNCFLLYTTAEKGPVLYEKIQKFKPEFKSRHKFEEGNLILIITLGKHRVS 300 AIKNFCAGFCTVSFLLCKGVNKPLECYNCLCKDPFSLIEENKPGLFQFEF 350 SEAPEEQSCNWNLIA…		30	MKHQFKKMCLVY	9	N-term
alphapolyomavirus	Pan troglodytes polyomavirus 4	monkey	1891736	UP000156881	>	K7QJ79	MDQILSRSQRKELISLLDLPPDEYGNYPLMKHQFKKMCLVYHPDKGGDGE 50 KMRKLNSLWQLFNNQLLEMRDNRFDMQQDESPIYGTPQFKEWWYAQFSPS 100 PPKYQRTSTNDRRGGGPDIHCDEVLESSDEEGPSTSTQTSFKRRRKTPHS 150 SSSQDFFSSTPKTSESSSSSYARDSGRDSTCSSDFTPNFTPPPSQCSPPK 200 PPREGDSNASQASFTSTPPKTKGSKVHNDPVDFPNSLSDYLSHAIYSNKT 250 LNCFLLYTTAEKGPVLYEKIQKFKPEFKSRHKFEEGNLILIITLGKHRVS 300 AIKNFCAGFCTVSFLLCKGVNKPLECYNCLCKDPFSLIEENKPGLFQFEF 350 SEAPEEQSCNWNLIA…		139	TSFKRRRKT	7	SV40
alphapolyomavirus	Pan troglodytes polyomavirus 5	monkey	1891737	UP000118114	>	K7QKH4	MDKILHKSEKKELIALLELPANEYGNYPLMKQQFKKMCLVYHPDKGGDGE 50 KMRRLNALWQTFNTELLEMRDNRFDMEQDDSPIYGTPQFKEWWYSQFPPT 100 PPKYQRTSTNDRRGGPDIRCDEVLESSDEEGPCTSTSTSFKRRRKTPHST 150 PSADFFSSTPKTSESSSSSYARDSGRDSSCSSDFSASFTTPPPTQCSPSK 200 PAGEADSTASQASFSSTPPKTKGSKVNNDPLDFPTCLFDYLSHAIYSNKT 250 MNSFVLYTTCEKGPVLYEKIEKYRPEFKSRHKYEEGNLIFIITLGKHRVS 300 AIKNFCASFCTVSFLLCKAVNKPIECYNCLCKEPFTLVEENKPGLFQHEF 350 SDLPEEQSCNWNLIA…		30	MKQQFKKMCLVY	8	N-term
alphapolyomavirus	Pan troglodytes polyomavirus 5	monkey	1891737	UP000118114	>	K7QKH4	MDKILHKSEKKELIALLELPANEYGNYPLMKQQFKKMCLVYHPDKGGDGE 50 KMRRLNALWQTFNTELLEMRDNRFDMEQDDSPIYGTPQFKEWWYSQFPPT 100 PPKYQRTSTNDRRGGPDIRCDEVLESSDEEGPCTSTSTSFKRRRKTPHST 150 PSADFFSSTPKTSESSSSSYARDSGRDSSCSSDFSASFTTPPPTQCSPSK 200 PAGEADSTASQASFSSTPPKTKGSKVNNDPLDFPTCLFDYLSHAIYSNKT 250 MNSFVLYTTCEKGPVLYEKIEKYRPEFKSRHKYEEGNLIFIITLGKHRVS 300 AIKNFCASFCTVSFLLCKAVNKPIECYNCLCKEPFTLVEENKPGLFQHEF 350 SDLPEEQSCNWNLIA…		138	TSFKRRRKT	7	SV40
alphapolyomavirus	Pan troglodytes polyomavirus 6	monkey	1891738	UP000107907	>	K7QJJ5	MDQVLSIEEKNELMDLLQISRAAWGNLSLMKKAYKSASKLYHPDKGGDPQ 50 KMQRLNELFQKLQVALLEIRSDCGSSSSQGYYSESSFYFTETPFSHCQPT 100 DEEGGSWGKWWRQFVNKECCDDLFCSETMASSESDEENTSAPLSAEDPEP 150 EPEASQNSFTCTPPKRKKTEPNTPEDFPNCLYSFLSHAIYSNKTTNSFLI 200 YTTVEKGKQLFKNVDKSKIKVDFKAIFSYKEEGILEGSLLFFITLGRHRV 250 SAIKHFCVSQCTLSFIHCKGVTKPLELYKALGKPPFRLIEENKPGVSMFD 300 FEEEKEQSVNWQELCNYALEAKIGDVLLLLGIYLDFAVEPGTCAKCEKKS 350 HKFHYNYHSKHHANA…		162	TPPKRKKTE	8	SV40
alphapolyomavirus	Pan troglodytes polyomavirus 6	monkey	1891738	UP000107907	>	K7QJJ5	MDQVLSIEEKNELMDLLQISRAAWGNLSLMKKAYKSASKLYHPDKGGDPQ 50 KMQRLNELFQKLQVALLEIRSDCGSSSSQGYYSESSFYFTETPFSHCQPT 100 DEEGGSWGKWWRQFVNKECCDDLFCSETMASSESDEENTSAPLSAEDPEP 150 EPEASQNSFTCTPPKRKKTEPNTPEDFPNCLYSFLSHAIYSNKTTNSFLI 200 YTTVEKGKQLFKNVDKSKIKVDFKAIFSYKEEGILEGSLLFFITLGRHRV 250 SAIKHFCVSQCTLSFIHCKGVTKPLELYKALGKPPFRLIEENKPGVSMFD 300 FEEEKEQSVNWQELCNYALEAKIGDVLLLLGIYLDFAVEPGTCAKCEKKS 350 HKFHYNYHSKHHANA…		8	EEKNELMDLLQISRAAWGNLSLMKKAYK	5.5	N-term
alphapolyomavirus	Pan troglodytes polyomavirus 7	monkey	1891739	UP000131860	>	K7QLH1	MDQTLSQDERKEYMELLKLPPAAWGNIPMMKKAYKTVVKTLHPDKGGDSA 50 KMQRLNELHQKMQSTLLDIRSNCGTSSSQGYHSQSQDPEGGSWGKFFRSH 100 VNENYDDLYCSETISSEDEEEESDASSTPGHSTPGRSTPGPSFSDEDPNS 150 SQHSFCTPPKKRKVETAPEDFPDCLDKFLSHALYSNKTLTSFCIYTTLEK 200 SAQLYKSFDKSKICVDFKSRFLYKSEGLDGGILFILTLTKHRASAVKTFC 250 SAQCTQSFLHCKGVTKPLELYQTLGKTPFKLIEENKAGLSLFDFEEGKEQ 300 SVNWLQVCQYANATGITDVMLLLGIYLDFAADFGTCDKCAKKKNKFHYNY 350 HEEHQANARLFLESK…		157	TPPKKRKVE	10.5	SV40
alphapolyomavirus	Pan troglodytes polyomavirus 7	monkey	1891739	UP000131860	>	K7QLH1	MDQTLSQDERKEYMELLKLPPAAWGNIPMMKKAYKTVVKTLHPDKGGDSA 50 KMQRLNELHQKMQSTLLDIRSNCGTSSSQGYHSQSQDPEGGSWGKFFRSH 100 VNENYDDLYCSETISSEDEEEESDASSTPGHSTPGRSTPGPSFSDEDPNS 150 SQHSFCTPPKKRKVETAPEDFPDCLDKFLSHALYSNKTLTSFCIYTTLEK 200 SAQLYKSFDKSKICVDFKSRFLYKSEGLDGGILFILTLTKHRASAVKTFC 250 SAQCTQSFLHCKGVTKPLELYQTLGKTPFKLIEENKAGLSLFDFEEGKEQ 300 SVNWLQVCQYANATGITDVMLLLGIYLDFAADFGTCDKCAKKKNKFHYNY 350 HEEHQANARLFLESK…		8	DERKEYMELLKLPPAAWGNIPMMKKAYKT	5.3	N-term
alphapolyomavirus	Yellow baboon polyomavirus 1	monkey	1286213	UP000105764	>	L0N113	MDQTLSKTERNELMDLLQITRAAWGNLSLMKKAYKTVSKLYHPDKGGDPA 50 KMQRLNELFQRVQVTLMEIRSQSGSSSSQGYFSEDFFFGPTTFQFCPMDR 100 DACREDLPNPGEGSWGKWWRQFANSQSSDDLFCSETMSSSSDEETPAAQP 150 APPPPTPEEEEDDIEFVEETPSSCDDQSSSQSSYTCTPPKKRKTEEKKPD 200 DFPVCLYSFLSHAIYSNKTMNSFLIYTTLEKARQLYRSVEKSKIKVDFKA 250 SFSYKDEEGEGCLLFLMTLGKHRVSAVKHFCVSQCTFSFIHCKGVVKPLE 300 LYKVLGKPPFKLLEENKPGVSMFDFQEEKEQAVNWQEICNFANEANISDV 350 LLLLGIYIDFAVDPG…		187	TPPKKRKTE	11.5	SV40
alphapolyomavirus	Philantomba monticola polyomavirus 1	antelope	2170411	UP000289246	>	A0A2S1CJJ1	MDRLLQKEEKALLIKLLGISPTSFGNIPLMRDAYKRASKKYHPDKGGEGV 50 EMTLLNSLWQRFQEGLLELRNPEVYSEAYGSPAFRERYREWCSTVFTNEE 100 SEFRGDLHCDESIISSEEEDAQEFTQESGYNSASFSATFPNTPDESRASS 150 TSTTQKDQAFSESKSYSSSKGSTPGRRSEGFEGETPKKRRRPAENLDESH 200 SSSQASFASTPPKTKKTSTDCPDDIPSGLFDFVSHAVFSNKTVNCFLLYS 250 TFDKASAFYDKIEKFTIEFKSLHSYEAAGILFFLTNKKHRLSAVKNFCQS 300 YCTVSFLICRTVLKPLDCFNCLCKTPFKCVKSNKPGLHSYDFDDKSEEAC 350 NWNKVADFAVKANVD…	visual inspection found additional cNLS and bipartite in SV40 position	184	ETPKKRRRPAE	13	SV40
alphapolyomavirus	Piliocolobus badius polyomavirus 2	monkey	1236406	UP000138641	>	A0A1B2FQZ4	MERVLQKSEKTQLMELLGIPKYAFGNFPIMKTAYKRASKSLHPDKGGSTE 50 KMMLLNSLWQKFQEGFIELRNSESFSEAYGSQSFRRRYQDWYTSVFTHEG 100 PGKGADLHCNESPISSSDEEDSPQTWRESSSQSSGYNSFPYTSTPTSASQ 150 EESSAAFSEPEQSETPSSSGTGSSGHEGETPEKRRRSAEDVDGSNSSSQA 200 SFASTPPKPKKTGSDIPTDLPSCLFDFVSHAVFSNKTVNAFILYSTLEKA 250 QELYDKIDKFKVEFKSLHKSVDALLSGGGLVLFLTTGRHRLSAIKNFCQN 300 FCTVSFLICKVVLKPLECYNCLCKLPFVEIKASKAGLYSFDFDDNAKEET 350 CNWNKVAEFAVAADL…	visual inspection found additional cNLS and bipartite in SV40 position	179	ETPEKRRRSAE	6	SV40
alphapolyomavirus	Piliocolobus rufomitratus polyomavirus 1	monkey	1236407	UP000175159	>	K7QJ82	MERVLQKSEKTQLMELLGIPKYAFGNFPIMKTAYKRASKSLHPDKGGSTE 50 KMMLLNSLWQKFQEGFIELRNSESFSEAYGSQSFKRRYQDWYSSVFTNEG 100 PHKGADLHCNESPISSSDEEEPTSTWRESSSQSSGYNSFPYTSTPTSASQ 150 DESSAPFSEPEQSETPSSSGTGSSGHEGETPEKRRRSAEDVDGSNSSSQA 200 SFASTPPKPKKTGSDIPTDLPSCLFDFVSHAVFSNKTVNSFILYSTLEKA 250 QELYDKIDKFKVEFKSLHKSVDAVLSGGGLVLFLTTGRHRLSAIKNFCQN 300 FCTVSFLICKVVLKPLECYNCLCKLPFVEIKASKAGLYSFDFDDNAKEET 350 CNWNKVAEFAVAADL…	visual inspection found additional cNLS and bipartite in SV40 position	179	ETPEKRRRSAE	6	SV40
alphapolyomavirus	Sumatran orang-utan polyomavirus	monkey	1604875	UP000151144	>	C9X3X1	DKILTKQQRKELIVLLDIEACDYGNYSIMKQQYKKMCLIYHPDKGGDGE 50 KMRKLNSLWQAFNTELLEIRDNRFDMEQDESPIYGTPQFKEWWYAQFSFC 100 ASPPKYQRTTTDDRRRGPDIRCDEVLESSDEEGPTTSTHSSSFKRRRKTP 150 HSTTSTDFFSSTPKTSESSSSSYARDSGRDSACSPDFSFSFTSPPSTQCS 200 PPKPPGEADSAASQASFSSTPPKTKGSKVHNDPLDFLNCLFDYLSHAIYS 250 NKTLNSFLLYTTCEKGKVLYEKVEKFKPEFKSRHKYEEGNLIFIITLGKH 300 RVSAIKNFCAGFCTVSFLLCKAVNKPMECYNCLSKGPFTLIEENKPGLFQ 350 YEFSDLPEEQSCNWNL…		141	SSFKRRRKT	8	SV40
alphapolyomavirus	Sumatran orang-utan polyomavirus	monkey	1604875	UP000151144	>	C9X3X1	DKILTKQQRKELIVLLDIEACDYGNYSIMKQQYKKMCLIYHPDKGGDGE 50 KMRKLNSLWQAFNTELLEIRDNRFDMEQDESPIYGTPQFKEWWYAQFSFC 100 ASPPKYQRTTTDDRRRGPDIRCDEVLESSDEEGPTTSTHSSSFKRRRKTP 150 HSTTSTDFFSSTPKTSESSSSSYARDSGRDSACSPDFSFSFTSPPSTQCS 200 PPKPPGEADSAASQASFSSTPPKTKGSKVHNDPLDFLNCLFDYLSHAIYS 250 NKTLNSFLLYTTCEKGKVLYEKVEKFKPEFKSRHKYEEGNLIFIITLGKH 300 RVSAIKNFCAGFCTVSFLLCKAVNKPMECYNCLSKGPFTLIEENKPGLFQ 350 YEFSDLPEEQSCNWNL…		30	MKQQYKKMCLIY	5	N-term
alphapolyomavirus	Bornean orang-utan polyomavirus	monkey	1604874	UP000144779	>	C9X3W6	MDRFLSREESNELMELLNIPKHCYGNFALMKINHRKMSLKYHPDKGGDPE 50 KMARLNALWQKLQEGIYNARQEYPTSFGSKHDVPTQDGRDIPPYGHPTWA 100 SWWESFNRDWDNLFEDLQDPDLFCDESTLPSDESRSPSPTPGTSTQFSEE 150 NPRRRRSEDPPTCSQSSFTATPPKPKKSKYDSVPNDFPNVLRPFLSSAVY 200 SNKTLSSFLIYTTNEKAEFLYKTLDKFNPDFKSRHAFQEGSLVFLMTPGK 250 HRVSAIRNLCLTHCTVSFLLCKAVIRQVECYRCMCSEPFKLLEESKPGIF 300 EYEFSEENGKPVVNWNLLTEFAVLNRLDDPLIIMAHYLDFAEEPSLCLKC 350 SKKNLKAHFNYHNVH…		172	PPKPKKSKYD	9.5	SV40
alphapolyomavirus	Raccoon polyomavirus	procyon	1219896	UP000143187	>	J7G6M5	MDTVLTSSERRELCSLLELDPQLWGNIPVMRNCYKKSCLKYHPDKGGDGQ 50 KMVRLNELWARATENLTRLREDCGFQDEPPIYGTPAFREWWFYQQNLYTW 100 SHDGPSTSSSSGRSRRWDSSRDHGEFAGGEGSSGRDRVHTSKSSTSMPSH 150 RPHSSANLHGDNSEDPLFCEETLDSSPSPPPSPAADPHTFTSSQSSTPSS 200 AFGFSSQTSTPSNASQGDSRTTGPHPNTPSPRRRKHREDHPTSPYASGGS 250 FSSTPPKSKKPRDSFSPLDFPSDLLDCLSRATLSNKTQNAFLIFSTKEKV 300 CLLYDKTDDKYKVEFKSLHKYKNGSGFLFIILLTKHRVTAIKNFCAQFCT 350 ISFLLCKAVIQPVQC…	visual inspection found additional cNLS and bipartite in SV40 position	255	PPKSKKPRDSF	8	SV40
alphapolyomavirus	bat polyomavirus 5b1	bat	2758139	UP000154973	>	A0A0D5ZYE4	MDKFMDREELRELCELLQIPPHCYGNLPMMKINYKKMSKIYHPDKGGDAE 50 KMKRMNELWQKLQDELSSSDDDGGSQSASPGPSTGRSSRRPSPPPPQSQS 100 SYSATPPKPKKRKTEHVPDDFPAVLHNFLSHAIYSNKTSSSFLIYTTTEK 150 GESLYCLIDKFKPEFKARFAYQEACILFIITAGKHRVSAIKNFCSTHCTV 200 SFLICKAVIKPLECYQEMKSEPFKLIEENKPGLYMHDFAEGPEKPGVDWN 250 LLSEFAVANHLDDPLLIMGFYLDFSNDPDACIKCNQKKLKTHYKHHADHY 300 KNALLFKECKTQKTVCQQASDIVQAKQRLKLVELTREELLTERFQCMLTK 350 LEDVFGQITIMEYMA…		106	PPKPKKRKTE	15.5	SV40
alphapolyomavirus	Rattus norvegicus polyomavirus 1	rodent	1679933	UP000151530	>	A0A0H4PP28	MDKILTKEEKSQLLALLDLDGQYWGDFGRMQKAYHAQSLKFHPDKGGDPL 50 LMQLLNTLWTKLKHGLHQVRLNLGGHEDVNPSTSRQPPEQFYNPETGHYW 100 SFSYGSAGFSENQKKWWKEFFEKWERDLYCSEELGSSSEDDTPAPASPIS 150 ISSSPPGSPRTPTRPGPSTALEPSPPSRKRVHANGPEHHGRKQLRRDQPP 200 APGGANIPGNGGRGAHIPEPDITNIPSDPAGGSQSTFGSYYNSTEELETN 250 ASEGEFQSSQTTPKKPPPNRHTPDDMPAVLRSFVSNAIYSNKTQNSFLIY 300 TTGEKGTVLYDNIAKYNPDFKALFSFKGDSLLLIITPGKHRVNAVKSYCC 350 RFCTVSFLLCKAVTK…	bipartite	176	PSRKRVHANGPEHHGRKQLRRD	7	SV40
alphapolyomavirus	Sorex araneus polyomavirus 1	shrew	2560769	UP000296299	>	A0A223PYK8	MDSILTFAERQLLISLLKISGDTFGNVPAMARAYKLAAKRLHPDKGGNEA 50 EMKKLNELWNKFKDGIYNLREYNPHRNPSGNPCGSFFWFRRFQSDLFADE 100 TLSSTSSDEEPEPAQRKRGTGANIHESASRTSFSTGSPGKGTRGGGGIPR 150 DAPPPDSGYGSFPFDSTPPKRGRNGGGSAPSTSGGVPDDFEGDSADQNCS 200 QATPPKSKKAKMDNGPSDFPCDINIFLSSAVYSNKTVNAFLIFTTVEKCQ 250 LLYQKIDVKFKIDFKSRHEGENKAHGYLYILTVAKHRVSAVKNYCAKQCT 300 ISFLHCKAINKPFDCYKALCCDPYKRIESNKDLFQTDFENENSQQVDWTL 350 ISTFAECNMIDDPYL…	visual inspection found additional cNLS and bipartite in SV40 position	204	PPKSKKAKMD	10.5	SV40
alphapolyomavirus	Sorex araneus polyomavirus 1	shrew	2560769	UP000296299	>	A0A223PYK8	MDSILTFAERQLLISLLKISGDTFGNVPAMARAYKLAAKRLHPDKGGNEA 50 EMKKLNELWNKFKDGIYNLREYNPHRNPSGNPCGSFFWFRRFQSDLFADE 100 TLSSTSSDEEPEPAQRKRGTGANIHESASRTSFSTGSPGKGTRGGGGIPR 150 DAPPPDSGYGSFPFDSTPPKRGRNGGGSAPSTSGGVPDDFEGDSADQNCS 200 QATPPKSKKAKMDNGPSDFPCDINIFLSSAVYSNKTVNAFLIFTTVEKCQ 250 LLYQKIDVKFKIDFKSRHEGENKAHGYLYILTVAKHRVSAVKNYCAKQCT 300 ISFLHCKAINKPFDCYKALCCDPYKRIESNKDLFQTDFENENSQQVDWTL 350 ISTFAECNMIDDPYL…	visual inspection found additional cNLS and bipartite in SV40 position	32	RAYKLAAKRLHPDKGGNEAEMKKLNE	5	N-term
alphapolyomavirus	Sorex coronatus polyomavirus 1	shrew	2560770	UP000296552	>	A0A223PYM2	MDSILTFAERQLLISLLRISGDTFGNVPAMARAYKLAAKRLHPDKGGNEA 50 EMKKLNELWHKFKDGTYNLREYNPYRNPSGSFFCFTRRTADLFADESLSS 100 TSSDEEPEPAQRKQGTGANVHESASRTSFSTGSPGKGTRGRGARGRGGGG 150 IHRDAPPPDSGYGSFPFDSTPPKRGRNGGGTTSSTCGGTQDEFEGDSAEQ 200 NCSQATPPKPKKAKMDNGPSDFPCDLNIFLSSAVYSNKTVNAFLIFTTIE 250 KCQLLYEKIDVKFKIDFKSRHEGENKAHGYLYILTVAKHRVSAVKNYCAK 300 QCTISFLHCKAINKPYDCFKALCCEPYKRVESNKDLFQTDFENENSQQVD 350 WTLISTFAECNMIDD…	visual inspection found additional cNLS and bipartite in SV40 position	207	PPKPKKAKMD	10.5	SV40
alphapolyomavirus	Sorex coronatus polyomavirus 1	shrew	2560770	UP000296552	>	A0A223PYM2	MDSILTFAERQLLISLLRISGDTFGNVPAMARAYKLAAKRLHPDKGGNEA 50 EMKKLNELWHKFKDGTYNLREYNPYRNPSGSFFCFTRRTADLFADESLSS 100 TSSDEEPEPAQRKQGTGANVHESASRTSFSTGSPGKGTRGRGARGRGGGG 150 IHRDAPPPDSGYGSFPFDSTPPKRGRNGGGTTSSTCGGTQDEFEGDSAEQ 200 NCSQATPPKPKKAKMDNGPSDFPCDLNIFLSSAVYSNKTVNAFLIFTTIE 250 KCQLLYEKIDVKFKIDFKSRHEGENKAHGYLYILTVAKHRVSAVKNYCAK 300 QCTISFLHCKAINKPYDCFKALCCEPYKRVESNKDLFQTDFENENSQQVD 350 WTLISTFAECNMIDD…	visual inspection found additional cNLS and bipartite in SV40 position	32	RAYKLAAKRLHPDKGGNEAEMKKLNE	5	N-term
alphapolyomavirus	Sturnira lilium polyomavirus 1	bat	1606500	UP000165035	>	J3ZGN4	MDKVLRKKEKKMLLSLLELNSNCFSNFPLMKQAYKRASKKLHPDKGGNNE 50 KMMMLNSLWQKYQEGIIELRNTQVFSDAYGTPSFQSRYREWASTVFTNEG 100 TSEGPDLHCHEPPVSSSSEDEERGAQAEPESSGYNSASFSAPFSSTPYPP 150 SSPTQENAPSPRSESPDTQSYADSSGTGGAEDIPSPERRSGGENVDGSYS 200 GSQASFASTPPKEKTKNLNSPSDIPSCLSDFVSHAVFSNKTVNSFLVYTT 250 LEKALLLYDKVDKLKVEFKSVHKGEEETGEGFLFMLCNTKHRLSAIRNFC 300 SQFCTVSFVICKIVLKPLDCYKCICNNPFQEIKGNKLLLSTHFDDGKEDG 350 CNWNKVTEFAVEADI…		34	YKRASKKLHPD	5.5	N-term
alphapolyomavirus	Sus scrofa polyomavirus 1	pig	1680894	UP000147829	>	A0A162GN70	MDIALTREERKELSELLDLAPHCFGNIPMMKFCYRKACLRLHPDKGGDAG 50 KMQRLNELWQTFQQSIDCLRNGENAGFYSFQDEDPIYGTPHFKHWWQSQQ 100 RTGYRFEDHFPTPDGATFGGSHLHFPSSRSWSSRGSSSRHSRRSSSPSAS 150 SESTRSSVPPSRSTSPSTSSQTGGCVFGDSQSSQSSSRRSQEPPEPDLFC 200 SETLDSSPGSPKFTGFSTTTASSSRASTSPPHGKRSATPSEGGFNDGASS 250 FHSAGSFSSTPPKPKKAKEDAFPTDFPACLADYISHAVYSNKTVSSFAVH 300 STLEKISLLYDKIDKFRVDFKSRHSYRDERNNTSGILFFLTLTKHRVSAI 350 KNFCGNFCTVSFLLV…		261	PPKPKKAKEDAF	7	SV40
alphapolyomavirus	Tupaia glis polyomavirus 1	shrew	2170402	UP000289461	>	A0A2S1CJR5	MDRVLEKSEKKELIKLLGIPAHSFGNIAVMKSAYKKVSKKYHPDKGGSGE 50 VMMSLNSLWQKFQEGCLEIRHEEPYSESYGSRFFREQYAEWCRSFFDEGP 100 TEQPDLHCDESCPSSEDEAGTQSSGYNSYPFTSTPNSSQDPGPSQSSFDP 150 FAGRGGGFRGSTTSSSTQEEDVSNSSSSTKGHPRDRDSVPPGRTRGTPKK 200 PENQRGRNSPDLDGSNPSSQASYQSTPPKDKRENSDRPTDIPSSLYDYVS 250 HALFSNKTVNAFLIYTTPEKALLLYDKVDKFHVEFKSVHENITGHLLFFM 300 TNSRHRVTAIKHYCQTFCTVSFLIVRTVLKPLELYKCLCKDPFKEIKANK 350 NGLYSFDFDDTKEAT…	no NLSfound by cNLS mapper; visual inspection found bipartite in SV40 position		/		/
betapolyomavirus	Bat polyomavirus 6a	bat	1623685	UP000105343	>	A0A0D5ZZ24	MDHALTREESVRLMQLLKLPMEQYGNFSLMRKAFLRECKNLHPDKGGNPE 50 LAKELITLYRKLEEQAPPYGTPEWDRWWEEFNDLFCHETFDRSDDEEEQR 100 KRPASPESEPECSQATPPKKKKKDHPKDMPEDLQQFLSNAILSNKTVSSF 150 LIFTTAEKSTLLYGKLRDRFKATFVSRHKQQGSDGEAFVFLITPSRHRVS 200 AINNFCNSLCSVSFIIVKGVIKEYNLYVHLCVEPYVKLQESIPGGLSRDF 250 FDTPEEAAKNVSWKMIAEFALDLMCDDIFLLMGMYKEFAEDPKSCAKCEA 300 KIISDHFQNHFHHYENALLFLDCRNQKAICQQAVDGVIAHRRVQTAQLSR 350 EQQLAERFKKLFEKM…		177	PPKKKKKDHP	9	SV40
betapolyomavirus	bat polyomavirus 2c	bat	2758133	UP000153654	>	J7HD82	MDHALSSEERKELCNLLGIARHCYGNYPLMKSNFKHACLKYHPDKGGDQE 50 KMARLNFLWQKFLSYFMEMRRNIPEEDEEPIYGTTAFRHWWYRQHSRSHG 100 RTQASTSGTSSRSSGYGSQPSQSSSTGSQDGFQQRQQHGESGDPDHSFDS 150 EQQHNQHQSTDSEQQHQQQNSKKQKQQSKKSHHSSSSSSSRSDIPSSHGS 200 HGFSGGNIYGNSSRVPPWDDDSLLCEESLSSSPSPEPAPTSTEEEPSFSE 250 SSSFRGPPGTPSQSTDDDFSMPRSPPKRRRAPSPPSSYSSTPPRPKKNKP 300 TSVPTDFPDDLLDCLSHAVYSNKTMSAFAIFTTQEKGKFFYEKLSEKFKV 350 EYKGRFGCKEGCILV…	visual inspection found additional cNLS and bipartite in SV40 position	273	RSPPKRRRAPS	10	SV40
betapolyomavirus	BK polyomavirus (strain AS) (BKPyV)	human	10631	UP000008166	>	P14999	MDKVLNREESMELMDLLGLERAAWGNLPLMRKAYLKKCKEFHPDKGGDED 50 KMKRMNTLYKKMEQDVKVAHQPDFGTWNSSEVPTYGTEEWESWWSSFNEK 100 WDEDLFCHEDMFASDEEATADSQHSTPPKKKRKVEDPKDFPSDLHQFLSQ 150 AVFSNRTLACFAVYTTKEKAQILYKKLMEKYSVTFISRHMCAGHNIIFFL 200 TPHRHRVSAINNFCQKLCTFSFLICKGVNKEYLLYSALTRDPYHIIEESI 250 QGGLKEHDFNPEEPEETKQVSWKLITEYAVETKCEDVFLLLGMYLEFQYN 300 VEECKKCQKKDQPYHFKYHEKHFANAIIFAESKNQKSICQQAVDTVLAKK 350 RVDTLHMTREEMLTE…		127	PPKKKRKVEDPKDF	16	SV40
betapolyomavirus	BK polyomavirus (strain AS) (BKPyV)	human	10631	UP000008166	>	P14999	MDKVLNREESMELMDLLGLERAAWGNLPLMRKAYLKKCKEFHPDKGGDED 50 KMKRMNTLYKKMEQDVKVAHQPDFGTWNSSEVPTYGTEEWESWWSSFNEK 100 WDEDLFCHEDMFASDEEATADSQHSTPPKKKRKVEDPKDFPSDLHQFLSQ 150 AVFSNRTLACFAVYTTKEKAQILYKKLMEKYSVTFISRHMCAGHNIIFFL 200 TPHRHRVSAINNFCQKLCTFSFLICKGVNKEYLLYSALTRDPYHIIEESI 250 QGGLKEHDFNPEEPEETKQVSWKLITEYAVETKCEDVFLLLGMYLEFQYN 300 VEECKKCQKKDQPYHFKYHEKHFANAIIFAESKNQKSICQQAVDTVLAKK 350 RVDTLHMTREEMLTE…		30	MRKAYLKKCKEFHPDKGGDEDKMKRMNT	6.2	N-term
betapolyomavirus	BK polyomavirus (strain AS) (BKPyV)	human	10631	UP000008166	>	P14999	MDKVLNREESMELMDLLGLERAAWGNLPLMRKAYLKKCKEFHPDKGGDED 50 KMKRMNTLYKKMEQDVKVAHQPDFGTWNSSEVPTYGTEEWESWWSSFNEK 100 WDEDLFCHEDMFASDEEATADSQHSTPPKKKRKVEDPKDFPSDLHQFLSQ 150 AVFSNRTLACFAVYTTKEKAQILYKKLMEKYSVTFISRHMCAGHNIIFFL 200 TPHRHRVSAINNFCQKLCTFSFLICKGVNKEYLLYSALTRDPYHIIEESI 250 QGGLKEHDFNPEEPEETKQVSWKLITEYAVETKCEDVFLLLGMYLEFQYN 300 VEECKKCQKKDQPYHFKYHEKHFANAIIFAESKNQKSICQQAVDTVLAKK 350 RVDTLHMTREEMLTE…		678	GFQCFKRPKTP	7	C-term
betapolyomavirus	Callosciurus prevostii polyomavirus 1	rodent	2721749		>	A0A6G9LXG7	MEGSLSRDEQKELMSLLGLHGSYWGAFSVMRKAYLEKCKEYHPDKGGDEN 50 KMKRMNELYKVVVEALRESSQPCSSWSSSEIPTYGTSQWEHWWETFNQHW 100 EDDLSCKEDMPPESPVSQDKPDSPHSRSRSPPLSQATPPKKPRMSEHPKE 150 FPEELRSFLSQAIFSNKTMSAFALYTTKEKGPLLYGKLVDKYHVNFASRH 200 GHGIYNVIFMITPTKHRVTAVSNYCSRFCTVSFILCRGVLKEYHLYAALC 250 LDPFTLEEESILGGLKEDFFTEMEKEEGKQVNWMMVSEFAKGIRSEDVHL 300 IMGYYNEFAYLPCLKCNSQSDPIHVKYHEAHHKNAKLFKEAHNQKNICQQ 350 AVDSVIAVRRVIAST…		137	TPPKKPRMS	7.5	SV40
betapolyomavirus	Callosciurus prevostii polyomavirus 1	rodent	2721749		>	A0A6G9LXG7	MEGSLSRDEQKELMSLLGLHGSYWGAFSVMRKAYLEKCKEYHPDKGGDEN 50 KMKRMNELYKVVVEALRESSQPCSSWSSSEIPTYGTSQWEHWWETFNQHW 100 EDDLSCKEDMPPESPVSQDKPDSPHSRSRSPPLSQATPPKKPRMSEHPKE 150 FPEELRSFLSQAIFSNKTMSAFALYTTKEKGPLLYGKLVDKYHVNFASRH 200 GHGIYNVIFMITPTKHRVTAVSNYCSRFCTVSFILCRGVLKEYHLYAALC 250 LDPFTLEEESILGGLKEDFFTEMEKEEGKQVNWMMVSEFAKGIRSEDVHL 300 IMGYYNEFAYLPCLKCNSQSDPIHVKYHEAHHKNAKLFKEAHNQKNICQQ 350 AVDSVIAVRRVIAST…		30	MRKAYLEKCKEYHPDKGGDENKMKRMNE	6.2	N-term
betapolyomavirus	Canis familiaris polyomavirus 1	dog	1980633	UP000201340	>	A0A1W6EU85	MDNTLPREEAKELMSLLGLDMCVWGNLPLIRKAYLKQCKELHPDKGGDEE 50 KMKRMNVLYKKLQDKINEIHGSNAWTYVPEEVPQYGTTEWEQWWDEFNAR 100 WQETEDNLRCDEEFDDKEEDQDYVPGGSQYTPPKKKKKCNEDVREFPECF 150 KDCLSNAVLSNKTINCFLIYTTMEKSKVLFNRIKKRYNCNFVGRYKYNED 200 ALLFVITCGKHRVSAIFNFCSRMCTVSFVLVKGVNKEKECYMLLTETPFE 250 MLEESIPGGLSTDEFGGEEDAKQVSWKLICDYAQQIKCEDVYLLIGLYGE 300 FADNVGNCEKCLKEQLPNHYKYHKDHAENAKLFAECKNQKNICQQAVDSV 350 IAKKRVEILTLSRQQ…		132	PPKKKKKCNED	11	SV40
betapolyomavirus	Canis familiaris polyomavirus 1	dog	1980633	UP000201340	>	A0A1W6EU85	MDNTLPREEAKELMSLLGLDMCVWGNLPLIRKAYLKQCKELHPDKGGDEE 50 KMKRMNVLYKKLQDKINEIHGSNAWTYVPEEVPQYGTTEWEQWWDEFNAR 100 WQETEDNLRCDEEFDDKEEDQDYVPGGSQYTPPKKKKKCNEDVREFPECF 150 KDCLSNAVLSNKTINCFLIYTTMEKSKVLFNRIKKRYNCNFVGRYKYNED 200 ALLFVITCGKHRVSAIFNFCSRMCTVSFVLVKGVNKEKECYMLLTETPFE 250 MLEESIPGGLSTDEFGGEEDAKQVSWKLICDYAQQIKCEDVYLLIGLYGE 300 FADNVGNCEKCLKEQLPNHYKYHKDHAENAKLFAECKNQKNICQQAVDSV 350 IAKKRVEILTLSRQQ…		30	IRKAYLKQCKELHPDKGGDEEKMKRMNV	6.5	N-term
betapolyomavirus	Cebus albifrons polyomavirus 1	monkey	1236392	UP000118240	>	K7QJK1	MDHTLTRDESKLLMELLNLPMEQYGNFPLMRKAFLQKCKILHPDKGGDQE 50 TAKMLISLYKRLEAEVQSLNTDDCFTTDQPTYGTEEWDQWWQHFNKDFDL 100 FCNETFTRSSEEEDEEGQKRKYSDSEEGCSQATPPKKKKTSSAQKDMPEQ 150 LKSFLSNAILSNKTINSFLIYTTLEKSGYLYCKLLEKFKPTFISRHKFDM 200 EGLLFVITPTKHRVSAISNFCHNLCSVSFVLVKGVIKEFNCYCALCIEPF 250 SLLSENIPGGLSSDYFDAPVEPNKNVSWKLVANYALDIMCDDIFLLMGLY 300 KEFAFNPTACEKCDAKLIPDHYKYHKDHYDNALLFDECKNQKPICQQAVD 350 GVIAFRRVETSQLTR…	visual inspection found bipartite in SV40 position				/
betapolyomavirus	Cercopithecus erythrotis polyomavirus 1	monkey	1236395	UP000173655	>	K7QK05	MDKVLNREESMELMDLLGLDRSAWGNLPLMRKAYLKKCKEFHPDKGGDED 50 KMKRMNTLYKKMEQDVKVAHQPDFGAWNSSEVPTYGTEEWEAWWSAFNDK 100 WDEDLFCHEEMFQSDEEATADSQHSTPPKKKRKVEDPKDFPTDLHPFLSQ 150 AVFSNRTLACFAVYTTKEKGQILYKKLMEKYSVTFISRHSSHGHNILFFL 200 TPHRHRVSAINNFCQKLCTFSFLICKGVNKEYLLYSTLSRDPYSIIEESI 250 QGGLKEHDFNPEEPEETKQVSWKLVTEYALDTKCEDVFLLLGMYLEFQTN 300 PEECRKCQKKDQPYHFKYHEKHFANATIFADSKNQKSICQQAVDTVLAKK 350 RVDSLHMTREEMLTE…		127	PPKKKRKVEDPKDF	16	SV40
betapolyomavirus	Cercopithecus erythrotis polyomavirus 1	monkey	1236395	UP000173655	>	K7QK05	MDKVLNREESMELMDLLGLDRSAWGNLPLMRKAYLKKCKEFHPDKGGDED 50 KMKRMNTLYKKMEQDVKVAHQPDFGAWNSSEVPTYGTEEWEAWWSAFNDK 100 WDEDLFCHEEMFQSDEEATADSQHSTPPKKKRKVEDPKDFPTDLHPFLSQ 150 AVFSNRTLACFAVYTTKEKGQILYKKLMEKYSVTFISRHSSHGHNILFFL 200 TPHRHRVSAINNFCQKLCTFSFLICKGVNKEYLLYSTLSRDPYSIIEESI 250 QGGLKEHDFNPEEPEETKQVSWKLVTEYALDTKCEDVFLLLGMYLEFQTN 300 PEECRKCQKKDQPYHFKYHEKHFANATIFADSKNQKSICQQAVDTVLAKK 350 RVDSLHMTREEMLTE…		30	MRKAYLKKCKEFHPDKGGDEDKMKRMNT	6.2	N-term
betapolyomavirus	Cercopithecus erythrotis polyomavirus 1	monkey	1236395	UP000173655	>	K7QK05	MDKVLNREESMELMDLLGLDRSAWGNLPLMRKAYLKKCKEFHPDKGGDED 50 KMKRMNTLYKKMEQDVKVAHQPDFGAWNSSEVPTYGTEEWEAWWSAFNDK 100 WDEDLFCHEEMFQSDEEATADSQHSTPPKKKRKVEDPKDFPTDLHPFLSQ 150 AVFSNRTLACFAVYTTKEKGQILYKKLMEKYSVTFISRHSSHGHNILFFL 200 TPHRHRVSAINNFCQKLCTFSFLICKGVNKEYLLYSTLSRDPYSIIEESI 250 QGGLKEHDFNPEEPEETKQVSWKLVTEYALDTKCEDVFLLLGMYLEFQTN 300 PEECRKCQKKDQPYHFKYHEKHFANATIFADSKNQKSICQQAVDTVLAKK 350 RVDSLHMTREEMLTE…		683	GFVCFKRPKTP	5	C-term
betapolyomavirus	Chlorocebus pygerythrus polyomavirus 2	monkey	1891758	UP000166238	>	L0N2D5	MDKVLNREESMELMDLLGLERAAWGNLPLMRKAYLRKCKEFHPDKGGDED 50 KMKRMNTLYKKMEQDVKVAHQPDFGAWSSSEVPTYGTEEWEAWWNSFNEK 100 WDEDLFCHEDMFQSDEEATADSQHSTPPKKKRKVEDPKDFPTDLHPFLSQ 150 AVFSNRTMACFAVYTTKEKGQILYKKLMEKYSVTFISRHSSSGHNILFFL 200 TPHRHRVSAINNFCQKLCTFSFLICKGVNKEYLLYSTLSREPYSIIEESI 250 QGGLKEHDFNPEEPEETKQVSWKLVTEYAVETKCEDVFLLLGMYLEFQQN 300 PEDCRKCQKKDQPYHFKYHEKHFANATIFADSKNQKSICQQAVDTVLAKK 350 RVDTLHMTREEMLTE…		127	PPKKKRKVEDPKDF	16	SV40
betapolyomavirus	Chlorocebus pygerythrus polyomavirus 2	monkey	1891758	UP000166238	>	L0N2D5	MDKVLNREESMELMDLLGLERAAWGNLPLMRKAYLRKCKEFHPDKGGDED 50 KMKRMNTLYKKMEQDVKVAHQPDFGAWSSSEVPTYGTEEWEAWWNSFNEK 100 WDEDLFCHEDMFQSDEEATADSQHSTPPKKKRKVEDPKDFPTDLHPFLSQ 150 AVFSNRTMACFAVYTTKEKGQILYKKLMEKYSVTFISRHSSSGHNILFFL 200 TPHRHRVSAINNFCQKLCTFSFLICKGVNKEYLLYSTLSREPYSIIEESI 250 QGGLKEHDFNPEEPEETKQVSWKLVTEYAVETKCEDVFLLLGMYLEFQQN 300 PEDCRKCQKKDQPYHFKYHEKHFANATIFADSKNQKSICQQAVDTVLAKK 350 RVDTLHMTREEMLTE…		30	MRKAYLRKCKEFHPDKGGDEDKMKRMNT	6.3	N-term
betapolyomavirus	bat polyomavirus 2a	bat	2758131	UP000162359	>	J3U5T0	MDKALTREESKELMELLGLSMTLYGQLPMMRKAYLSKCKEYHPDKGGDET 50 KMKRMNELYKKLEDALSNASQEEHLWNSWKSGQCPEYGTPEWESWWAEFN 100 ANWDANMRCDEEMPSSDDEEAGPSSQYTPPKKKARRGDVPSDFPENLLDF 150 LSKAVFSNKTLTSFLVFTTFEKSALLYKKLLDKFSATFCSRHGYGSDKAL 200 VFMLTPNRHRVSAVNNYCKKFCSISFVLVKAVIKEYMCYSTLCKDPYKVL 250 EESIPGGLKENAFMPDEQEEPKQVNWKLISEYACKVECDDVHLLMGLYLE 300 FETPPEGCPKCDERVLVSHHKFHRDHHENAKIFCQCKNQKAICQQAVDAV 350 IAKKRVDSLVLTRKQ…		127	YTPPKKKARRG	10.5	SV40
betapolyomavirus	bat polyomavirus 2a	bat	2758131	UP000162359	>	J3U5T0	MDKALTREESKELMELLGLSMTLYGQLPMMRKAYLSKCKEYHPDKGGDET 50 KMKRMNELYKKLEDALSNASQEEHLWNSWKSGQCPEYGTPEWESWWAEFN 100 ANWDANMRCDEEMPSSDDEEAGPSSQYTPPKKKARRGDVPSDFPENLLDF 150 LSKAVFSNKTLTSFLVFTTFEKSALLYKKLLDKFSATFCSRHGYGSDKAL 200 VFMLTPNRHRVSAVNNYCKKFCSISFVLVKAVIKEYMCYSTLCKDPYKVL 250 EESIPGGLKENAFMPDEQEEPKQVNWKLISEYACKVECDDVHLLMGLYLE 300 FETPPEGCPKCDERVLVSHHKFHRDHHENAKIFCQCKNQKAICQQAVDAV 350 IAKKRVDSLVLTRKQ…		30	MRKAYLSKCKEYHPDKGGDETKMKRMNE	6.3	N-term
betapolyomavirus	Bat polyomavirus 6b	bat	1623689	UP000154663	>	A0A0D5ZYR9	MDTGLSREESQRLLELLQLDPEHYGNWQLMRKSFLRMCKIMHPDKGGNPE 50 AAKELITLYKKLENNISSLNPEECFTTSQPPPYGTPEWERWWDEFNDLFC 100 HEQFPSDEESSQQSEKRRSPSPEPSQSTPPKKKKTAPPQDMPQDLLPFLS 150 SAILSNKTVSTFLIYTTKEKSIILYQKLKVKYNCTFISRHKLNANEHEAL 200 VYMITPCRHRVSAINNYCHSLCSVSFILCKGVIKEYQLYVHLTIEPYGIL 250 EESIVGGLSREFFDTPEEAAKNVSWKMISEYALDSLNDDLFLLMGLYKEF 300 ADPPQECYKCKDKIVPSHYDFHQQHHENALLFVECRNQKAICQQAVDGVI 350 AFKRVQNTQLSREQQ…	visual inspection found bipartite in SV40 position		/		/
betapolyomavirus	Bat polyomavirus 6c	bat	1623688	UP000131757	>	A0A0D5ZZ40	MDHALTREESQRLMELLNLPMEQFGNFHLMKRAFLSSIKKYHPDKGGDES 50 MAKELISLYKKAECHVSSLETEDDTSFTTDEVPPYGTPEWEAWWNNFNDL 100 FCREQFDRSESEEEEEEEEEPPPSCSSQKSSQKRDREEEEPESSQSTPPK 150 KKKPNNPTEMPEDLLPFLSQAILSNKTVSGFCIFTTLEKSLLLYHKLTDK 200 YKPTFISRHKDNRNNNHGYVYLITPTRHRVSAINNYCVQLCTVSFVICKG 250 IIKDYSLFVHLSVEPYVLLNESIPGGLTREFFDSPEEAQKNVSWKMISEF 300 ALQINCDDVFLLMGLYKEFALETETCSKCKDKINPDHFQFHKEHQDNAKL 350 FDDCRNQKTICQQAV…	visual inspection found bipartite in SV40 position	148	PPKKKKPNNP	5	SV40
betapolyomavirus	Equus caballus polyomavirus 1	horse	1891761	UP000140360	>	I3QJF1	MERLLSKDEARQLMELLKLDMEKYGDIPTMRKAYLRRCKELHPDKGGDEN 50 LMKKLNELYRKLESGLADLSEQPGTSSAEPKFPKYGTPEWEQWWKDFNKT 100 WDDDLRCDEEMPSSDEEMPHSQATPPKKKQKTADAPKDFPPEIKEFLSNA 150 IFSNKTLNCFVLYTTKEKAVLLYRKVMDKFQTFFISRHGYEEAYSILFFL 200 TLNRHRVSAINNFCRRLCTVSFLLCKGVLREYFCYSALTRPPFTVLQESV 250 PGGLMENDFKPCDDDEAKMVSWKMVSEYALAIRCEDLHLLLGLYLEFEVE 300 PEKCEKCDKKQHPDHFEHHAKHHENACLFSESKNQKGICGQAIDAVIAKK 350 RVDAMVMTRAELLAE…		125	PPKKKQKTA	10	SV40
betapolyomavirus	Equus caballus polyomavirus 1	horse	1891761	UP000140360	>	I3QJF1	MERLLSKDEARQLMELLKLDMEKYGDIPTMRKAYLRRCKELHPDKGGDEN 50 LMKKLNELYRKLESGLADLSEQPGTSSAEPKFPKYGTPEWEQWWKDFNKT 100 WDDDLRCDEEMPSSDEEMPHSQATPPKKKQKTADAPKDFPPEIKEFLSNA 150 IFSNKTLNCFVLYTTKEKAVLLYRKVMDKFQTFFISRHGYEEAYSILFFL 200 TLNRHRVSAINNFCRRLCTVSFLLCKGVLREYFCYSALTRPPFTVLQESV 250 PGGLMENDFKPCDDDEAKMVSWKMVSEYALAIRCEDLHLLLGLYLEFEVE 300 PEKCEKCDKKQHPDHFEHHAKHHENACLFSESKNQKGICGQAIDAVIAKK 350 RVDAMVMTRAELLAE…		29	TMRKAYLRRCKELHPDKGGDENLMKKLNE	5.9	N-term
betapolyomavirus	Glis glis polyomavirus 1	rodent	2170404	UP000290684	>	A0A2S1CJL7	MESSLNRDEQKELMDLLGLDATCWGAMQLMRRAYHRKCLEYHPDKGGNEE 50 KMKRMNVLYKKLMDAIETETPEQTWCWDSTEIPTYGTAAWEQWWNEFNNL 100 FCDEDMPTSDPEEGPSTSQRPPSPSQKRSSQDTTYTPPKRSRRADPQEMP 150 EVLKEYLSNALFSNKTFTAFLVYTTAEKAPTLYKKLVDRFHATFCSRHSY 200 ELYNFILVLTANKHRVSALHNFATKFCTFSFIIVRAVLKEVPCYNRMTFD 250 PFTLIEETIPGGLNEDHFGDTEESKQVDWTVVQELAINLKTDDVHLLMGY 300 YLEFGKPLPQCNKCKAGDKIHAAHHATHHKNALLFRQCKSQKNVCQQAID 350 GFIALRRVQTASATR…	cNLS found a bipartite in SV40 position	135	YTPPKRSRRA	6	SV40
betapolyomavirus	Glis glis polyomavirus 1	rodent	2170404	UP000290684	>	A0A2S1CJL7	MESSLNRDEQKELMDLLGLDATCWGAMQLMRRAYHRKCLEYHPDKGGNEE 50 KMKRMNVLYKKLMDAIETETPEQTWCWDSTEIPTYGTAAWEQWWNEFNNL 100 FCDEDMPTSDPEEGPSTSQRPPSPSQKRSSQDTTYTPPKRSRRADPQEMP 150 EVLKEYLSNALFSNKTFTAFLVYTTAEKAPTLYKKLVDRFHATFCSRHSY 200 ELYNFILVLTANKHRVSALHNFATKFCTFSFIIVRAVLKEVPCYNRMTFD 250 PFTLIEETIPGGLNEDHFGDTEESKQVDWTVVQELAINLKTDDVHLLMGY 300 YLEFGKPLPQCNKCKAGDKIHAAHHATHHKNALLFRQCKSQKNVCQQAID 350 GFIALRRVQTASATR…		29	LMRRAYHRKCLEYHPDKGGNEEKMKRMNV	5.5	N-term
betapolyomavirus	Glis glis polyomavirus 1	rodent	2170404	UP000290684	>	A0A2S1CJL7	MESSLNRDEQKELMDLLGLDATCWGAMQLMRRAYHRKCLEYHPDKGGNEE 50 KMKRMNVLYKKLMDAIETETPEQTWCWDSTEIPTYGTAAWEQWWNEFNNL 100 FCDEDMPTSDPEEGPSTSQRPPSPSQKRSSQDTTYTPPKRSRRADPQEMP 150 EVLKEYLSNALFSNKTFTAFLVYTTAEKAPTLYKKLVDRFHATFCSRHSY 200 ELYNFILVLTANKHRVSALHNFATKFCTFSFIIVRAVLKEVPCYNRMTFD 250 PFTLIEETIPGGLNEDHFGDTEESKQVDWTVVQELAINLKTDDVHLLMGY 300 YLEFGKPLPQCNKCKAGDKIHAAHHATHHKNALLFRQCKSQKNVCQQAID 350 GFIALRRVQTASATR…	cNLS found a bipartite in SV40 position	120	RPPSPSQKRSSQDTTYTPPKRSRR	11.2	SV40
betapolyomavirus	JC polyomavirus	human	10632	UP000164053	>	F6LSF9	MDKVLNREESMELMDLLGLDRSAWGNIPVMRKAYLKKCKELHPDKGGDED 50 KMKRMNFLYKKMEQGVKVAHQPDFGTWNSSEVPTYGTDEWESWWNTFNEK 100 WDEDLFCHEEMFASDDENTGSQHSTPPKKKKKVEDPKDFPVDLHAFLSQA 150 VFSNRTVASFAVYTTKEKAQILYKKLMEKYSVTFISRHGFGGHNILFFLT 200 PHRHRVSAINNYCQKLCTFSFLICKGVNKEYLFYSALCRQPYAVVEESIQ 250 GGLKEHDFNPEEPEETKQVSWKLVTQYALETKCEDVFLLMGMYLDFQENP 300 QQCKKCEKKDQPNHFNHHEKHYYNAQIFADSKNQKSICQQAVDTVAAKQR 350 VDSIHMTREEMLVER…		126	PPKKKKKVED	9	SV40
betapolyomavirus	JC polyomavirus	human	10632	UP000164053	>	F6LSF9	MDKVLNREESMELMDLLGLDRSAWGNIPVMRKAYLKKCKELHPDKGGDED 50 KMKRMNFLYKKMEQGVKVAHQPDFGTWNSSEVPTYGTDEWESWWNTFNEK 100 WDEDLFCHEEMFASDDENTGSQHSTPPKKKKKVEDPKDFPVDLHAFLSQA 150 VFSNRTVASFAVYTTKEKAQILYKKLMEKYSVTFISRHGFGGHNILFFLT 200 PHRHRVSAINNYCQKLCTFSFLICKGVNKEYLFYSALCRQPYAVVEESIQ 250 GGLKEHDFNPEEPEETKQVSWKLVTQYALETKCEDVFLLMGMYLDFQENP 300 QQCKKCEKKDQPNHFNHHEKHYYNAQIFADSKNQKSICQQAVDTVAAKQR 350 VDSIHMTREEMLVER…		30	MRKAYLKKCKELHPDKGGDEDKMKRMNF	6.5	N-term
betapolyomavirus	JC polyomavirus	human	10632	UP000164053	>	F6LSF9	MDKVLNREESMELMDLLGLDRSAWGNIPVMRKAYLKKCKELHPDKGGDED 50 KMKRMNFLYKKMEQGVKVAHQPDFGTWNSSEVPTYGTDEWESWWNTFNEK 100 WDEDLFCHEEMFASDDENTGSQHSTPPKKKKKVEDPKDFPVDLHAFLSQA 150 VFSNRTVASFAVYTTKEKAQILYKKLMEKYSVTFISRHGFGGHNILFFLT 200 PHRHRVSAINNYCQKLCTFSFLICKGVNKEYLFYSALCRQPYAVVEESIQ 250 GGLKEHDFNPEEPEETKQVSWKLVTQYALETKCEDVFLLMGMYLDFQENP 300 QQCKKCEKKDQPNHFNHHEKHYYNAQIFADSKNQKSICQQAVDTVAAKQR 350 VDSIHMTREEMLVER…		675	GFQCFKKPKTP	5.5	C-term
betapolyomavirus	KI polyomavirus (isolate Stockholm 60)	human	423446	UP000107189	>	P0DOI6	MDKTLSREEAKQLMQLLCLDMSCWGNLPLMRRQYLVKCKEYHPDKGGNEE 50 SMKLLNSLYLKLQDSVSSVHDLNEEEDNIWQSSQIPTYGTPDWDEWWSQF 100 NTYWEEELRCNESMPSSPKRSAPEEEPSCSQATPPKKKHAFDASLEFPKE 150 LLEFVSHAVFSNKCITCFVVHTTREKGEVLYKKLLQKYQCSFISKHAFYN 200 TVLIFFLTPHKHRVSAINNFCKGHCTVSFLFCKGVNNPYGLYSRMCRQPF 250 NLCEENIPGGLKENEFNPEDLFGEPKEPSLSWNQIANFALEFDIDDVYYL 300 LGSYIRFATKPEECEKCSKNDDATHKRVHVQNHENAVLLQESKSQKNACT 350 QAIDRVIAERRYNCL…	visual inspection found bipartite in SV40 position		/		/
betapolyomavirus	WU polyomavirus	human	440266	UP000118542	>	A5HBG1	MDKTLSRNEAKELMQLLGLDMTCWGNLPLMRTKYLSKCKEFHPDKGGNEE 50 KMKKLNSLYLKLQECVSTVHQLNEEEDEVWSSSQIPTYGTPDWDYWWSQF 100 NSYWEEELRCNEEMPKSPGETPTKRTREDDEEPQCSQATPPKKKKDNATD 150 ASLSFPKELEEFVSQAVFSNRTLTAFVIHTTKEKAETLYKKLLSKFKCNF 200 ASRHSYYNTALVFILTPFRHRVSAVNNFCKGYCTISFLFCKGVNNAYGLY 250 SRMTRDPFTLCEENIPGGLKENDFKAEDLYGEFKDQLNWKALSEFALELG 300 IDDVYLLLGLYLQLSIKVEECEKCNSNEDATHNRLHMEHQKNALLFSDSK 350 SQKNVCQQAIDVVIA…	visual inspection found additional cNLS and bipartite in SV40 position	140	PPKKKKDNAT	5	SV40
betapolyomavirus	Leptonychotes weddellii polyomavirus 1	seal	1925019	UP000204454	>	A0A1L4AB40	MDRALSRKESKELMTLLGLPMSFYGHLPVMRKAFIKKSKEYHPDKGGDED 50 KCKRLTCLYRKLEDNVKKHRDFDDLWGGAGPSWRSADIPPYGTPDWDQWW 100 DAFNKDWGSEEDLHCNETLDPSDDESTQDTQESTPPKKKRKFDFPESVIK 150 FLSKAIVSNKTYDKFAIGTNIEKSCSLYKKILDKYNVLFISRHQHEDIVI 200 ILLLTGSKHRTSAIENFCMKFCTYSFVCCRAVLNDKEMYEVMCEEPFQKI 250 EESVEGGLFNDDEKEPSVSWVKIQEYALENEIEDVLLLMGLYLDLAKPLS 300 NCMACLEEKILTHCRFHKQHYENAKLFKESRSQKNICQQAVDGVLAARRV 350 QLVNMKREDLLCLRF…		135	PPKKKRKFDF	18	SV40
betapolyomavirus	Leptonychotes weddellii polyomavirus 1	seal	1925019	UP000204454	>	A0A1L4AB40	MDRALSRKESKELMTLLGLPMSFYGHLPVMRKAFIKKSKEYHPDKGGDED 50 KCKRLTCLYRKLEDNVKKHRDFDDLWGGAGPSWRSADIPPYGTPDWDQWW 100 DAFNKDWGSEEDLHCNETLDPSDDESTQDTQESTPPKKKRKFDFPESVIK 150 FLSKAIVSNKTYDKFAIGTNIEKSCSLYKKILDKYNVLFISRHQHEDIVI 200 ILLLTGSKHRTSAIENFCMKFCTYSFVCCRAVLNDKEMYEVMCEEPFQKI 250 EESVEGGLFNDDEKEPSVSWVKIQEYALENEIEDVLLLMGLYLDLAKPLS 300 NCMACLEEKILTHCRFHKQHYENAKLFKESRSQKNICQQAVDGVLAARRV 350 QLVNMKREDLLCLRF…		30	MRKAFIKKSKEYHPDKGGDEDKCKRLTC	5.9	C-term
betapolyomavirus	African elephant polyomavirus 1	elephant	1399914	UP000127353	>	T2FG67	MDRALNREDSKSLMGLLGLNMEQYGNVPLMYNRYKKKCLQYHPEKGGNAT 50 IMKELNRLWTQFTCSLEKVRRQDEEGQSWSRSEVPTYGTPEWEAWWSDFN 100 RDYDDGSSSAAEDETDNAQFNTNFRPTFSTPPKKKTEAPSDFPQCLDEYL 150 SKALFSNKTVQCFLIYTTKDKAMRLYHILMEKFNPTFLSRHSFEFNSMLF 200 LLTPKKHRVTAIYNFCAKHCVVSFLKVKAPLNPFLCYGRLCKAPFCMQQE 250 SVPGGLRDNYYAPDEQEGSKQVCWKTIAKYASDIECTDVYLLLGFYTEFE 300 EDPDLCTKCDHHTTPMHFLHHRQHHSNAKLFAESKNQKSVCTQAVDRVIG 350 QLRVKMTLTSRRDLL…		30	MYNRYKKKCLQY	8	N-term
betapolyomavirus	Mastomys natalensis polyomavirus 1	rodent	1891768	UP000157997	>	E5RUP4	MDHTLTREESLRLMELLQLPMEQYGNFPLMRKAFLARCRVLHPDKGGDQT 50 LAKELITLYRKLEEHLPQLDPQERFSTDQIPTYGTEEWEAWWRNFNQDYD 100 LFCNEMFDASDEEELPQSQSQKRPPSPEEEEPQTSQATPPKKKKPAETPK 150 DIPKDLKEFLSNAILSNKTITAFLVYTTLEKSQLLYKKLTEKYKPVFISR 200 HKLETEGFVYMLTPGRHRVSAVANYCSTLCSISFLVVKGIIKEIALYNHL 250 CVAPYAVLQENLPGGLNSEFFDMTEEAKNVCWTPVCQYALDIMCDDVYLL 300 MGLYKEFAVDVNDCKKCNYKVIPDHYDHHRKHHANALLFVESRNQKTICQ 350 QAVDGVIAQRRVDVA…	visual inspection found bipartite in SV40 position	139	PPKKKKPAET	5	SV40
betapolyomavirus	Mastomys natalensis polyomavirus 1	rodent	1891768	UP000157997	>	E5RUP4	MDHTLTREESLRLMELLQLPMEQYGNFPLMRKAFLARCRVLHPDKGGDQT 50 LAKELITLYRKLEEHLPQLDPQERFSTDQIPTYGTEEWEAWWRNFNQDYD 100 LFCNEMFDASDEEELPQSQSQKRPPSPEEEEPQTSQATPPKKKKPAETPK 150 DIPKDLKEFLSNAILSNKTITAFLVYTTLEKSQLLYKKLTEKYKPVFISR 200 HKLETEGFVYMLTPGRHRVSAVANYCSTLCSISFLVVKGIIKEIALYNHL 250 CVAPYAVLQENLPGGLNSEFFDMTEEAKNVCWTPVCQYALDIMCDDVYLL 300 MGLYKEFAVDVNDCKKCNYKVIPDHYDHHRKHHANALLFVESRNQKTICQ 350 QAVDGVIAQRRVDVA…	visual inspection found bipartite in SV40 position	610	ILKWKTRINEEVTVTAMSDMDLNCKEGKDI	5.6	C-term
betapolyomavirus	Meles meles polyomavirus 1	badger	1608323	UP000118164	>	A0A0B5LB58	MDGALSREESIKLMQLLGLPMQMYGHIPVMRKAFLQKSKEYHPDKGGDEE 50 TFKTLCGLYRKLENSLRSQTDFEKAWEENAEGSWSTSDIPPYGTDDWERW 100 WESFNQSWDDLRCDETLEPSDEEDNTQDSTPPKKKRPSAPEFPDVVEAFL 150 SKALISNRTHNKFAILTNKEKSCSLYKKVQDKYAPIFVSRHTYEVGAIIL 200 LLTSGKHRTSAIQNFCQKYCTYSTLCCRAVLNDKGLYEVLCNEPFEKSEE 250 TVEGGLFNDQEKEPVVSWVKIQDYALENKIEDVLLLMGLYLELAKPVANC 300 MDCLEEQIITHYKYHKGHHENAKLFRECKSQKNICQQAIDGVIARRRMQL 350 VTLKREELLVLRFKD…		130	TPPKKKRPS	5	SV40
betapolyomavirus	Meles meles polyomavirus 1	badger	1608323	UP000118164	>	A0A0B5LB58	MDGALSREESIKLMQLLGLPMQMYGHIPVMRKAFLQKSKEYHPDKGGDEE 50 TFKTLCGLYRKLENSLRSQTDFEKAWEENAEGSWSTSDIPPYGTDDWERW 100 WESFNQSWDDLRCDETLEPSDEEDNTQDSTPPKKKRPSAPEFPDVVEAFL 150 SKALISNRTHNKFAILTNKEKSCSLYKKVQDKYAPIFVSRHTYEVGAIIL 200 LLTSGKHRTSAIQNFCQKYCTYSTLCCRAVLNDKGLYEVLCNEPFEKSEE 250 TVEGGLFNDQEKEPVVSWVKIQDYALENKIEDVLLLMGLYLELAKPVANC 300 MDCLEEQIITHYKYHKGHHENAKLFRECKSQKNICQQAIDGVIARRRMQL 350 VTLKREELLVLRFKD…		30	MRKAFLQKSKEYHPDKGGDEETFKTLCG	5	N-term
betapolyomavirus	Common vole polyomavirus	rodent	1737523	UP000165507	>	A0A0P0HGX9	MDRTLSRSEAKELMQLLELDMCCWGNLPLMRKAYLNKCKEHHPDKGGDEE 50 LMKRLNSLYLQLEESVKRMQCLNEEDSLWSSTQVPTYGTREWEEWWENFN 100 RAWEEEQIRRDREESSRKRKHDHSQPSTSSQNDSGCYYSQDQPDLSCNEE 150 FEYCLNEFVSQAVFSNRTLTSFIVHTTKEKSELLYKKLLVKFKCNFASRH 200 FNADSGFVFLITPFKHRVSAVNNFCKTHCTVSFLNCKGVNNPYLCYSCMC 250 RDPFRLVEESIIGGLKENDFKPADIYGEEKDELNWKIIADYAQSIHCEDP 300 YLLMGMYSQFAAIPDECVHCKEAKVQEHYKYHEIHHHNAALFVFAKSQKS 350 ICQQACDTVTAARRV…	strange cNLS in SV40 position, without T and P	114	ESSRKRKHDHS	10	SV40
betapolyomavirus	Common vole polyomavirus	rodent	1737523	UP000165507	>	A0A0P0HGX9	MDRTLSRSEAKELMQLLELDMCCWGNLPLMRKAYLNKCKEHHPDKGGDEE 50 LMKRLNSLYLQLEESVKRMQCLNEEDSLWSSTQVPTYGTREWEEWWENFN 100 RAWEEEQIRRDREESSRKRKHDHSQPSTSSQNDSGCYYSQDQPDLSCNEE 150 FEYCLNEFVSQAVFSNRTLTSFIVHTTKEKSELLYKKLLVKFKCNFASRH 200 FNADSGFVFLITPFKHRVSAVNNFCKTHCTVSFLNCKGVNNPYLCYSCMC 250 RDPFRLVEESIIGGLKENDFKPADIYGEEKDELNWKIIADYAQSIHCEDP 300 YLLMGMYSQFAAIPDECVHCKEAKVQEHYKYHEIHHHNAALFVFAKSQKS 350 ICQQACDTVTAARRV…	strange cNLS in SV40 position, without T and P	30	MRKAYLNKCKEHHPDKGGDEELMKRLN	6	N-term
betapolyomavirus	Miniopterus africanus polyomavirus 1	bat	1891769	UP000129482	>	L0GBB8	MDKALTREESQQLMELLGLPMVQYGNLPAMRKAFLQKCKILHPDKGGNEE 50 QMKTLMSLYKKLEDHLKDVQDEEFWAHSWRADEVPSYGTPEWDSWWQHFN 100 KDLHCHENLEESDEEEPGCSQSTPPKKKKRQDNPRDLPECLKDFLSQAIF 150 SNKTQCCFVIYTTKEKGPFLHKKIVDKFHPLFISRHSFEMNNILYFLTPN 200 KHRVSAINNFSLKFCSVSFVIVKAVIKEYLCYSALCRDPFKLLEESVPGG 250 LSENFFNAEEVEDVKCVSWKKVSEFALAIMCEDVHLLMGLYLEFQEEPEN 300 CSKCANKILPNHYNFHKLHFENALLFADCKNQKSICQQAVDAVVAKLRVE 350 SLVLSREQLLINKFK…		124	PPKKKKRQD	11	SV40
betapolyomavirus	Mus musculus polyomavirus 2	mouse	1891770	UP000158963	>	A2IBB1	MDHQLTREESQRLMHLLKLPMEQYGNFPLMRKAFLRACKIVHPDKGGSDE 50 LSQELISLYRRLEESLPCLSTQDFIETDILQIPSYGTPEWDEWWKEFNKD 100 FDLFCNEAFDRSDDEQEPQPDDSAPSSSRPPTPPGSQATPPKKKAKMDSP 150 NDMPADLMEYLSCAILSNKTITCFLIYTTLEKSELLYNKLSEKYKPRFIS 200 RHKYEGNSLIFIITGTKHRVSAVFNYCATYCSVSFIVVKGVIKEYPLYCH 250 LCVEPYSVLQESIEGGLNSEFFDAPEDAAKNVNWVAISEYALKINCDDIY 300 LLMGLYKEFQSPVPNCSKCENRMLTNHFKFHKEHHENALLFAACRNQKTI 350 CQQAVDGVIAQRRVD…		140	PPKKKAKMD	11.5	SV40
betapolyomavirus	Mus musculus polyomavirus 3	mouse	2171394	UP000500976	>	A0A2S0SYY6	MDKSINLYKKLLSKFKCTFCSRHTYGATGLVFLITPAKHRVTAINNYCKA 50 FCTVSFLYCKGVNNPYLCYSRMCDEPFKKVEENVSGGLKENDFKAEDIFG 100 EAAEQINWRMIADYAQATKQEDVYLLMGHYMQFASEPTKCTICDEKKIKE 150 HCKYHSGHHKNALLFVECKNQKNICQQAVDTVTAAKRVFQQHKTREELVL 200 LRFKQKLEELNDRLKGESDIMLFMSGVAWYTCLFEDIDLKVYKILDILTC 250 NVPKKRYVVFKGPINSGKTTLACALLDLLGGKSLNINVPADKLNFELGCA 300 MDQFMVVFEDVKGSNKDRPDLPKGQGIYNLDNLRDYLDGCVPVNLEKKHM 350 NKRSQLFPPGIVTMN…			/		/
betapolyomavirus	Bank vole polyomavirus	rodent	1737522	UP000143471	>	A0A0P0HWM3	MDRTLSRSEAKELMQLLDLDMCCWGNLPLMRKAYLNKCKEHHPDKGGNEE 50 LMKRLNSLYLQLEESVKRMQCLNEEDSMWSTTQVPTYGTQEWEEWWENFN 100 RAWEEEQIRRDREEYSKKRKSDTSQPTASTSQNDSGYYHSQEQPDLTCHE 150 EFEYCLNEFVSQAVFSNRTLTSFIVHTTKEKSELLYKKLLVKFKCNFASR 200 HFNSDSGFVFLITPFKHRVSAVNNFCKTHCTVSFLTCKGVNNPYLCYSCM 250 CRDPFRLVEESIIGGLKENDFKPADIYGDEKDELNWKIIADYAQAIHCED 300 PYLLMGMYSQFSANPEDCNHCKEAKVQEHYKYHEIHHHNAALFVFAKSQK 350 SICQQACDTVTAARR…	strange cNLS in SV40 position, without T and P	112	REEYSKKRKSD	6	SV40
betapolyomavirus	Bank vole polyomavirus	rodent	1737522	UP000143471	>	A0A0P0HWM3	MDRTLSRSEAKELMQLLDLDMCCWGNLPLMRKAYLNKCKEHHPDKGGNEE 50 LMKRLNSLYLQLEESVKRMQCLNEEDSMWSTTQVPTYGTQEWEEWWENFN 100 RAWEEEQIRRDREEYSKKRKSDTSQPTASTSQNDSGYYHSQEQPDLTCHE 150 EFEYCLNEFVSQAVFSNRTLTSFIVHTTKEKSELLYKKLLVKFKCNFASR 200 HFNSDSGFVFLITPFKHRVSAVNNFCKTHCTVSFLTCKGVNNPYLCYSCM 250 CRDPFRLVEESIIGGLKENDFKPADIYGDEKDELNWKIIADYAQAIHCED 300 PYLLMGMYSQFSANPEDCNHCKEAKVQEHYKYHEIHHHNAALFVFAKSQK 350 SICQQACDTVTAARR…	strange cNLS in SV40 position, without T and P	30	MRKAYLNKCKEHHPDKGGNEELMKRLN	5.4	N-term
betapolyomavirus	Myotis polyomavirus VM-2008	bat	563775	UP000128324	>	B6E002	MDHTLSREESKRLMSLLGLSMDQWGNFPIMRKAFLTKCKILHPDKGGDQE 50 LAKELISLYKRAQESAAALNPDTQFSTTQIPTYGTPEWEEWWRSFNQEFD 100 IFCNEQFDRSDSEEEYQSQPPSQSQARSPSPEPEPSTSGYDSQSQSQRFK 150 RGADEEDSQQSQATPPKRKKDNKKPTEMPDDLLPFLSAAILSNKTVTNFL 200 VYTTIEKSEYLYRKLRERYKATFISRHRLEAAGFVYMITPSRHRVTAVQN 250 FASALCSVSFLIIKAVIKPFECYQHLCLPPYNKDMENLDGGLNRDFFDVP 300 EEAARLVSWKQITDYALATNCDDVFLLMGQYKEFAQEVEGCKKCDEKIFY 350 EHYNYHKMHTENAQV…		164	TPPKRKKDNK	6	SV40
betapolyomavirus	Myotis polyomavirus VM-2008	bat	563775	UP000128324	>	B6E002	MDHTLSREESKRLMSLLGLSMDQWGNFPIMRKAFLTKCKILHPDKGGDQE 50 LAKELISLYKRAQESAAALNPDTQFSTTQIPTYGTPEWEEWWRSFNQEFD 100 IFCNEQFDRSDSEEEYQSQPPSQSQARSPSPEPEPSTSGYDSQSQSQRFK 150 RGADEEDSQQSQATPPKRKKDNKKPTEMPDDLLPFLSAAILSNKTVTNFL 200 VYTTIEKSEYLYRKLRERYKATFISRHRLEAAGFVYMITPSRHRVTAVQN 250 FASALCSVSFLIIKAVIKPFECYQHLCLPPYNKDMENLDGGLNRDFFDVP 300 EEAARLVSWKQITDYALATNCDDVFLLMGQYKEFAQEVEGCKKCDEKIFY 350 EHYNYHKMHTENAQV…		7	REESKRLMSLLGLSMDQWGNFPIMRKAFLTK	5.4	N-term
betapolyomavirus	Pan troglodytes verus polyomavirus 8	monkey	1762023	UP000134413	>	A0A0S2VEK7	MDKVLNREESMELMDLLGLERSSWGNLPAMRKAYLKKCKEFHPDKGGDED 50 KMKRMNTLYKKMEQDVKIAHQPDFGAWNSSEIPTYGTEEWESWWNSFNEK 100 WDEELFCHEDMFASDEEATADSQHSTPPKKKRKVEDPKDFPSDLHAFLSQ 150 AVFSNRTLACFAVYTTKEKAKILYKKIMEKYSVTFISRHSCQGHNILFFL 200 TPHRHRVSAINNFCQKLCTFSFLICKGVNKEYLLYSALSREPYSIIEESI 250 QGGLKEHDFNPEEPEETKQVSWKLVTEYALETKCDDVFLLLGMYLDFQIN 300 PEQCKKCEKKDQPYHFKFHEKHFANATIFADSKNQKSICQQAVDTVLAKK 350 RVDTAHMTREEMLIE…		127	PPKKKRKVEDPKDF	16	SV40
betapolyomavirus	Pan troglodytes verus polyomavirus 8	monkey	1762023	UP000134413	>	A0A0S2VEK7	MDKVLNREESMELMDLLGLERSSWGNLPAMRKAYLKKCKEFHPDKGGDED 50 KMKRMNTLYKKMEQDVKIAHQPDFGAWNSSEIPTYGTEEWESWWNSFNEK 100 WDEELFCHEDMFASDEEATADSQHSTPPKKKRKVEDPKDFPSDLHAFLSQ 150 AVFSNRTLACFAVYTTKEKAKILYKKIMEKYSVTFISRHSCQGHNILFFL 200 TPHRHRVSAINNFCQKLCTFSFLICKGVNKEYLLYSALSREPYSIIEESI 250 QGGLKEHDFNPEEPEETKQVSWKLVTEYALETKCDDVFLLLGMYLDFQIN 300 PEQCKKCEKKDQPYHFKFHEKHFANATIFADSKNQKSICQQAVDTVLAKK 350 RVDTAHMTREEMLIE…		30	MRKAYLKKCKEFHPDKGGDEDKMKRMNT	6.2	N-term
betapolyomavirus	Panthera leo polyomavirus 1	felid	2170405	UP000290440	>	A0A2S1CJM1	MDHILTREESKRLMELLNLPMTEYGNFPLMRRAFLKACKILHPDKGGNAE 50 QAQELISLYRKLEESLPSLNPQESFTTDQIPPYGTPQWEAWWRDFNKDFD 100 LSCDESMEDSDEGEPQPSTSQQQRRKRESPDDSTPGSQATPPKKPAQQEE 150 KEIPEDLVEFLSKAILSNKTITSFLIYTTLEKSTLLYTRLLSRFKCTFIS 200 RHKFNCDGFVFLITPAKHRVSAINNFCINFCSVSFLKVCGVNKEVPLYQK 250 LCETPYVLLTENIKGGLDAELFDIPEEAQRNVSWKMIADFASKTQCEDLY 300 LLLGLYKEFASSVETCKKCDEKIIPDHYEHHKDHYSNACLFLDCKNQKAI 350 CQQAIDGVIASRRVE…			/		/
betapolyomavirus	Yellow baboon polyomavirus 2	monkey	1286214	UP000167507	>	L0MZS0	MDKVLNREESMELMDLLGLERAAWGNLPLMRKAYLRKCKEFHPDKGGDED 50 KMKRMNTLYKKMEQDVKVAHQPDFGAWHSSEVPTYGTEEWEAWWSSFNEK 100 WDEELFCHEDMFQSDEEATGDSQHSTPPKKKRKVEDPKDFPPDLHQFLSQ 150 AVFSNRTLACFAVYTTKEKGQILYKKLMEKYSVTFISRHSCHGHNILFFL 200 TPHRHRVSAINNFCQKLCTFSFLICKGVNKEYLLYSTLSRDPYSIVEESI 250 QGGLKEHDFNPEEPEETKQVSWKLVTEYALETKCEDVFLLLGMYLEFQHN 300 PEECRKCEKKEQPYHFKYHEKHFANATIFADSKNQKSICQQAVDTVLAKK 350 RVDTLHMTREEMLTE…		127	PPKKKRKVEDPKDF	16	SV40
betapolyomavirus	Yellow baboon polyomavirus 2	monkey	1286214	UP000167507	>	L0MZS0	MDKVLNREESMELMDLLGLERAAWGNLPLMRKAYLRKCKEFHPDKGGDED 50 KMKRMNTLYKKMEQDVKVAHQPDFGAWHSSEVPTYGTEEWEAWWSSFNEK 100 WDEELFCHEDMFQSDEEATGDSQHSTPPKKKRKVEDPKDFPPDLHQFLSQ 150 AVFSNRTLACFAVYTTKEKGQILYKKLMEKYSVTFISRHSCHGHNILFFL 200 TPHRHRVSAINNFCQKLCTFSFLICKGVNKEYLLYSTLSRDPYSIVEESI 250 QGGLKEHDFNPEEPEETKQVSWKLVTEYALETKCEDVFLLLGMYLEFQHN 300 PEECRKCEKKEQPYHFKYHEKHFANATIFADSKNQKSICQQAVDTVLAKK 350 RVDTLHMTREEMLTE…		30	MRKAYLRKCKEFHPDKGGDEDKMKRMNT	6.3	N-term
betapolyomavirus	Pteronotus davyi polyomavirus 1	bat	1891773	UP000124894	>	L0GBC3	MDKALNREESQELMQLLGLHMTLYGQLPMMRKAYLNKCKEYHPDKGGDEQ 50 KMKRMNELYKKLEDALSAASKEETVWNSWASGECPTYGTTEWEAWWQQFN 100 ASWDEENLRCDEEMFDEDEEEPHSQTTPPKKKARRDTPTEFPEVLLEFLS 150 KAVFSNRCVSAFAIYTTKEKSVMLYRKVWDKFSATFISRHGHGVDKAVLY 200 VLTPNKHRVSALNNFCKKFCSISFVLVKAIIKPYLCYCALKKDPFEILDE 250 SVPGGLSENAFNPEECEEGPKMVNWKQVSDYACAIKCDDVHLLMGLYLEF 300 DLPVEGCDKCDRQQLASHFKYHQEHAENAKLFAVCKNQKSICQQAVDAVI 350 AKRRVDQLVLTRKQM…		128	PPKKKARRDTPTEF	12	SV40
betapolyomavirus	Pteronotus davyi polyomavirus 1	bat	1891773	UP000124894	>	L0GBC3	MDKALNREESQELMQLLGLHMTLYGQLPMMRKAYLNKCKEYHPDKGGDEQ 50 KMKRMNELYKKLEDALSAASKEETVWNSWASGECPTYGTTEWEAWWQQFN 100 ASWDEENLRCDEEMFDEDEEEPHSQTTPPKKKARRDTPTEFPEVLLEFLS 150 KAVFSNRCVSAFAIYTTKEKSVMLYRKVWDKFSATFISRHGHGVDKAVLY 200 VLTPNKHRVSALNNFCKKFCSISFVLVKAIIKPYLCYCALKKDPFEILDE 250 SVPGGLSENAFNPEECEEGPKMVNWKQVSDYACAIKCDDVHLLMGLYLEF 300 DLPVEGCDKCDRQQLASHFKYHQEHAENAKLFAVCKNQKSICQQAVDAVI 350 AKRRVDQLVLTRKQM…		30	MRKAYLNKCKEYHPDKGGDEQKMKRMNE	6.2	N-term
betapolyomavirus	bat polyomavirus 2b	bat	2758132	UP000167685	>	J3W7X8	MDKALNREESQELMQLLGLHMTLYGQLPMMRKAYLNKCKEYHPDKGGDEN 50 KMKRMNELYKKLEDALSATSREETIWNSWSAGECPEYGTPEWESWWREFN 100 ASWDEDNLRCDEEMFDEDEEEEHQSQTTPPKKKARRDTPTEFPEVLMDFL 150 SKAVFSNRCVSAFAIYTTKEKSIMLYRKVWDKFSATFISRHGHGIDKAIL 200 YVLTPNKHRVSALNNFCKKFCSISFVLVKAIIKPYLCYVTLKKEPFELLD 250 ESVPGGLSENAFQPEDCEEGPKLVNWKQISDYACAIKCDDVHLLMGLYLE 300 FESAVEGCDKCDKQQLPYHFKHHKDHTENAALFAVCKNQKSICQQAVDAV 350 IAKRRVDQLVLSRKQ…		129	PPKKKARRDTPTEF	12	SV40
betapolyomavirus	bat polyomavirus 2b	bat	2758132	UP000167685	>	J3W7X8	MDKALNREESQELMQLLGLHMTLYGQLPMMRKAYLNKCKEYHPDKGGDEN 50 KMKRMNELYKKLEDALSATSREETIWNSWSAGECPEYGTPEWESWWREFN 100 ASWDEDNLRCDEEMFDEDEEEEHQSQTTPPKKKARRDTPTEFPEVLMDFL 150 SKAVFSNRCVSAFAIYTTKEKSIMLYRKVWDKFSATFISRHGHGIDKAIL 200 YVLTPNKHRVSALNNFCKKFCSISFVLVKAIIKPYLCYVTLKKEPFELLD 250 ESVPGGLSENAFQPEDCEEGPKLVNWKQISDYACAIKCDDVHLLMGLYLE 300 FESAVEGCDKCDKQQLPYHFKHHKDHTENAALFAVCKNQKSICQQAVDAV 350 IAKRRVDQLVLSRKQ…		30	MRKAYLNKCKEYHPDKGGDENKMKRMNE	6	N-term
betapolyomavirus	Rattus norvegicus polyomavirus 2	rodent	1919247	UP000201054	>	A0A1J0MVR9	MDRTLNRAEAKELMELLDLHMSAWGNMPLLRKKYLEKCKEYHPDKGGDET 50 KMKRLNTLYRKLEEKVHIVHEEARFEAWDSNKNTLSTYMLAYTKLHFFLK 100 VPTYGTREWDMWWEQFNRAWEEEQIRRDREEREKRRKQPNRDSQQSQQDS 150 AYFTQEPGTSSQGTSQGTSQGPTCEEDLHCDEEFFDEPFEEEPPSNSQAT 200 PPKKNKNDIPNFPEHLLEFVSQALFSNRTMTCFIIHTTMDKANNLYKKLI 250 VKFKCTFCSKHSYGDTGLVFMITPGKHRVSAINNYCKAFCTVSFLYCKGV 300 NNPYLCYSRLCDEPFKKVEESIPGGLRDNDFQAEDIFGEASEQINWKQIA 350 EYAQVTRQEDVFLLM…	visual inspection found cNLS in SV40 position	30	LRKKYLEKCKEYHPDKGGDETKMKRLNT	6.2	N-term
betapolyomavirus	Rousettus aegyptiacus polyomavirus 1 (Strain: 12SuB01)	bat	1904411	UP000201766	>	A0A1S7J028	MDTGLTREESQTLLQLLNLGPESYGNWGLMRKAFLSKCKELHPDKGGDPE 50 KAKLLISLYKKLEANVTTLNPEESFSTSEPPRYGTPEWDQWWADFNDLFC 100 HEHFPSDEEEPPSFQKRKSPSPEPSQATPPKKKKAAPPQDFPEDLQSFLS 150 SAILSNKTVSCFCIYTTLEKSILLYKKLKEKYNATFVSRHKHSSNDYEGY 200 LFMITPSRHRVSAILNYCRSLCSVSFVLVKGVNKEYPLYCHLCVEPFCRL 250 EENIPGGLSRDFFDSPEEAQKNVSWKLISDFALEGNMDDIYLLMGIYKEF 300 AESPEDCTKCKDKIIQLHYEHHPLHHENAQHFVECRNQKAICQQAVDGVI 350 ASKRVQNTQLSREQQ…		129	PPKKKKAAPP	7	SV40
betapolyomavirus	Rousettus aegyptiacus polyomavirus 1 (Strain: 12SuB01)	bat	1904411	UP000201766	>	A0A1S7J028	MDTGLTREESQTLLQLLNLGPESYGNWGLMRKAFLSKCKELHPDKGGDPE 50 KAKLLISLYKKLEANVTTLNPEESFSTSEPPRYGTPEWDQWWADFNDLFC 100 HEHFPSDEEEPPSFQKRKSPSPEPSQATPPKKKKAAPPQDFPEDLQSFLS 150 SAILSNKTVSCFCIYTTLEKSILLYKKLKEKYNATFVSRHKHSSNDYEGY 200 LFMITPSRHRVSAILNYCRSLCSVSFVLVKGVNKEYPLYCHLCVEPFCRL 250 EENIPGGLSRDFFDSPEEAQKNVSWKLISDFALEGNMDDIYLLMGIYKEF 300 AESPEDCTKCKDKIIQLHYEHHPLHHENAQHFVECRNQKAICQQAVDGVI 350 ASKRVQNTQLSREQQ…		114	FQKRKSPSPEPSQATPPKKKKAAP	9	SV40
betapolyomavirus	Rousettus aegyptiacus polyomavirus 1 (Strain: 12SuB01)	bat	1904411	UP000201766	>	A0A1S7J028	MDTGLTREESQTLLQLLNLGPESYGNWGLMRKAFLSKCKELHPDKGGDPE 50 KAKLLISLYKKLEANVTTLNPEESFSTSEPPRYGTPEWDQWWADFNDLFC 100 HEHFPSDEEEPPSFQKRKSPSPEPSQATPPKKKKAAPPQDFPEDLQSFLS 150 SAILSNKTVSCFCIYTTLEKSILLYKKLKEKYNATFVSRHKHSSNDYEGY 200 LFMITPSRHRVSAILNYCRSLCSVSFVLVKGVNKEYPLYCHLCVEPFCRL 250 EENIPGGLSRDFFDSPEEAQKNVSWKLISDFALEGNMDDIYLLMGIYKEF 300 AESPEDCTKCKDKIIQLHYEHHPLHHENAQHFVECRNQKAICQQAVDGVI 350 ASKRVQNTQLSREQQ…		30	MRKAFLSKCKELHPDKGGDPEKAKLLI	5	N-term
betapolyomavirus	Squirrel monkey polyomavirus	monkey	452475	UP000135044	>	LT_POVSM	MDYTLTREESKLLMELLGLPMEQYGNFPLMRKAFLQKCKIMHPDKGGDEQ 50 TAKMLISLYKKLESEVKSLNTDDGFSTEEIPTYGSAEWEQWWQTFNEDFD 100 LFCHETFTVSDDEEEGGEKRKHSDEEEPSCSQATPPKKKKTSSAPKDMPE 150 LLRNFLSNAILSNKTLTCFLVYTTLEKSSLLYSKLSEKFKPTFISRHKLD 200 NEGLIFLITPSKHRVSAITNFCSNLCSVSFLIVKAVIKEYSCYCALCVEP 250 FVLVVENIPGGLNSDFFDAPQEASKNVSWKLIGEYALSIMCDDLFLLLGL 300 YKEFAVNPSTCSKCDQKVIVDHYKYHSLHYANAMLFTDCKNQKAICQQAV 350 DGVLAFRRVQTAQLT…	visual inspection found monopartite and bipartite in SV40 position		/		/
betapolyomavirus	Saimiri sciureus polyomavirus 1	monkey	1236410	UP000155657	>	K7QKI1	MDHTLTREESKLLMELLGLPMEQYGNFPLMRKAFLQKCKIMHPDKGGDEQ 50 AAKMLISLYKKLESEVKSLNTDDGFSTEEIPTYGSAEWERWWQTFNEDFD 100 LFCHETFTVSDDEEEGGEKRKHDDEEPSCSQATPPKKKKTPSAPRDMPEP 150 LRNFLSNAILSNKTMTSFLVYTTLEKSCLLYSKLSDKFKPTFISRHKLDS 200 EGLIFLITPSKHRVSAITNFCSNLCSISFLIVKAVIKEFSCYCALCVEPF 250 VLVVENIPGGLNSDFFDTPQEASKNVSWKLIGEYALNIMCDDLFLLLGLY 300 KEFAVNPDTCCKCDQKVVVDHYKYHTLHYANAMLFMDCKNQKAICQQAVD 350 GVLAFRRVQTAQLTR…	visual inspection found bipartite in SV40 position	134	PPKKKKTPS	5	SV40
betapolyomavirus	Sciurus carolinensis polyomavirus 1	rodent	2721750		>	A0A6G9LUL0	MESALTRDEQKELMGLLGLDPGCWGAMQLMRRAYHKKCLEYHPDKGGDGE 50 KMKRMNVLYKKVMDNIERETPEQTWSWNSTEIPTYGTAAWDQWWQDFNDL 100 FCDEAFEDPSPPPPPPTPTPEEEDGTSATPPKRSRRADPTEMPDPLKDFL 150 SNALFSNKTFTSFMLYTTAEKAPSLYKKLIDRFHATFCSRHSYPPYNLIF 200 VITSNKHRVSAIQNFAAKFCTYSFILVRAVLKEYQCYMRLTFDPFAVIEE 250 TLPGGLSEDAFGTAEEAKQVDWKLVQSFALGLDSEDVHLVFGYYLEFALP 300 PNDCFKCKQENRVHKEYHEEHYKNAQLFRDSKSQKNICQQAVDAVIASRR 350 VKNSCASREELLKFR…		129	TPPKRSRRA	5	SV40
betapolyomavirus	Sciurus carolinensis polyomavirus 1	rodent	2721750		>	A0A6G9LUL0	MESALTRDEQKELMGLLGLDPGCWGAMQLMRRAYHKKCLEYHPDKGGDGE 50 KMKRMNVLYKKVMDNIERETPEQTWSWNSTEIPTYGTAAWDQWWQDFNDL 100 FCDEAFEDPSPPPPPPTPTPEEEDGTSATPPKRSRRADPTEMPDPLKDFL 150 SNALFSNKTFTSFMLYTTAEKAPSLYKKLIDRFHATFCSRHSYPPYNLIF 200 VITSNKHRVSAIQNFAAKFCTYSFILVRAVLKEYQCYMRLTFDPFAVIEE 250 TLPGGLSEDAFGTAEEAKQVDWKLVQSFALGLDSEDVHLVFGYYLEFALP 300 PNDCFKCKQENRVHKEYHEEHYKNAQLFRDSKSQKNICQQAVDAVIASRR 350 VKNSCASREELLKFR…		29	LMRRAYHKKCLEYHPDKGGDGEKMKRMNV	5.6	N-term
betapolyomavirus	Simian virus 40 (SV40)	monkey	1891767	UP000007705	>	P03070	MDKVLNREESLQLMDLLGLERSAWGNIPLMRKAYLKKCKEFHPDKGGDEE 50 KMKKMNTLYKKMEDGVKYAHQPDFGGFWDATEIPTYGTDEWEQWWNAFNE 100 ENLFCSEEMPSSDDEATADSQHSTPPKKKRKVEDPKDFPSELLSFLSHAV 150 FSNRTLACFAIYTTKEKAALLYKKIMEKYSVTFISRHNSYNHNILFFLTP 200 HRHRVSAINNYAQKLCTFSFLICKGVNKEYLMYSALTRDPFSVIEESLPG 250 GLKEHDFNPEEAEETKQVSWKLVTEYAMETKCDDVLLLLGMYLEFQYSFE 300 MCLKCIKKEQPSHYKYHEKHYANAAIFADSKNQKTICQQAVDTVLAKKRV 350 DSLQLTREQMLTNRF…		125	PPKKKRKVEDPKDF	16	SV40
betapolyomavirus	Simian virus 40 (SV40)	monkey	1891767	UP000007705	>	P03070	MDKVLNREESLQLMDLLGLERSAWGNIPLMRKAYLKKCKEFHPDKGGDEE 50 KMKKMNTLYKKMEDGVKYAHQPDFGGFWDATEIPTYGTDEWEQWWNAFNE 100 ENLFCSEEMPSSDDEATADSQHSTPPKKKRKVEDPKDFPSELLSFLSHAV 150 FSNRTLACFAIYTTKEKAALLYKKIMEKYSVTFISRHNSYNHNILFFLTP 200 HRHRVSAINNYAQKLCTFSFLICKGVNKEYLMYSALTRDPFSVIEESLPG 250 GLKEHDFNPEEAEETKQVSWKLVTEYAMETKCDDVLLLLGMYLEFQYSFE 300 MCLKCIKKEQPSHYKYHEKHYANAAIFADSKNQKTICQQAVDTVLAKKRV 350 DSLQLTREQMLTNRF…		30	MRKAYLKKCKEFHPDKGGDEEKMKKMNT	5.9	N-term
betapolyomavirus	Vicugna pacos polyomavirus 1	camelidae	2169757	UP000204035	>	A0A1V0CLV9	MDRTLDREESKELMALLGLSMSCWGNIPMMRRAYKVQCRNLHPDKGGDEE 50 KMKRLTELYKKLEETLGVIHSQNESEEGSWNASEVPRYATPEWEQWWKVF 100 NENWEDLYCNEKMDESDEERPGPSQTTPPKKKAKMEDPIDDKFPECLNEY 150 VSQALFSNRTLNCFLIHTTKEKSINLYKKLLQGKWNPNFVSRHGYKNVGF 200 IFMLTPQKHRVSAVNNYCKSFCTVSFVNCKGVNQIYPLYSRLCRDPFTMC 250 EESIAGGLEENDFTAEDISGGEKKDVVNWKQITDYALEIKCDDVYLLMGM 300 YLDFQYEPTLCTKCQQKIIYNHYKFHEKEYNNAKIFAEAKAQKNICQQAV 350 DAVLAKRRVDNLTLT…		128	PPKKKAKME	10.5	SV40
betapolyomavirus	Vicugna pacos polyomavirus 1	camelidae	2169757	UP000204035	>	A0A1V0CLV9	MDRTLDREESKELMALLGLSMSCWGNIPMMRRAYKVQCRNLHPDKGGDEE 50 KMKRLTELYKKLEETLGVIHSQNESEEGSWNASEVPRYATPEWEQWWKVF 100 NENWEDLYCNEKMDESDEERPGPSQTTPPKKKAKMEDPIDDKFPECLNEY 150 VSQALFSNRTLNCFLIHTTKEKSINLYKKLLQGKWNPNFVSRHGYKNVGF 200 IFMLTPQKHRVSAVNNYCKSFCTVSFVNCKGVNQIYPLYSRLCRDPFTMC 250 EESIAGGLEENDFTAEDISGGEKKDVVNWKQITDYALEIKCDDVYLLMGM 300 YLDFQYEPTLCTKCQQKIIYNHYKFHEKEYNNAKIFAEAKAQKNICQQAV 350 DAVLAKRRVDNLTLT…		27	IPMMRRAYKVQCRNLHPDKGGDEEKMKRLTE	5.5	N-term
betapolyomavirus	California sea lion polyomavirus 1	sea lion	715223	UP000171487		D3IZT4	MDRALNRKESRELMNLLGLPMSYYGHLPIMRKAFIQKSKEYHPDKGGDED 50 KCKKLTCLYRKLEDNIQKNKDYEDMWGNAGPSWRSNEIPRYGTPEWDQWW 100 DAFNKDWGTEEDLHCHETLDPSDDENTQDSTPPKKKRKFDFPESVIQFLS 150 KAIVSNKTYDKFAIGTNLDKSRSLYKKIQDKYNVRFISRHQIDDLGIILL 200 LTAGKHRTSALENYCMKFCTYSYVCCRAVLNEREMYEVMSETPFQKLEES 250 VEGGYFSTEEKEPTVSWVQIQDYALENDIEDVLLLMGLYLELAKPLSNCM 300 HCLEEKLQTHCKFHKEHHENAKLFKESRSQKNICQQAVDGVLAAKRVQLV 350 QLSRNDLLCLRIKKL…		132	PPKKKRKFDF	18	SV40
betapolyomavirus	California sea lion polyomavirus 1	sea lion	715223	UP000171487		D3IZT4	MDRALNRKESRELMNLLGLPMSYYGHLPIMRKAFIQKSKEYHPDKGGDED 50 KCKKLTCLYRKLEDNIQKNKDYEDMWGNAGPSWRSNEIPRYGTPEWDQWW 100 DAFNKDWGTEEDLHCHETLDPSDDENTQDSTPPKKKRKFDFPESVIQFLS 150 KAIVSNKTYDKFAIGTNLDKSRSLYKKIQDKYNVRFISRHQIDDLGIILL 200 LTAGKHRTSALENYCMKFCTYSYVCCRAVLNEREMYEVMSETPFQKLEES 250 VEGGYFSTEEKEPTVSWVQIQDYALENDIEDVLLLMGLYLELAKPLSNCM 300 HCLEEKLQTHCKFHKEHHENAKLFKESRSQKNICQQAVDGVLAAKRVQLV 350 QLSRNDLLCLRIKKL…		30	MRKAFIQKSKEYHPDKGGDEDKCKKLTCLY	6.6	N-term
deltapolyomaviorus	Giant panda polyomavirus	panda	2016463	UP000201543	>	A0A220IG74	MDAVLTKAEKDELMSLLGLAPTCYGNLPLMQQKYKKASLKFHPDKGGDEE 50 KMKRLNCLFGKVYNSFSDLRDQPRGSCSSQDIPTYGTREWEAWWEEFNHG 100 ADGDDLYCSENLDSSDEDYQPPPTSSSRRSPKTSTPPDSPSPPPTPSPSP 150 PTPSPSESSSSAGSGWSPPPNHPSSSPPTDPPPQKKRRGDSPNTTQQSFS 200 TPPKQKKMDSPEDFPEELRACLSNAVFSNKTVSAFLIYTTKEKGLVLVDS 250 LDKFDPNYRGCFKYRDYSLVFLLTPGKHRVTAVTNYCKQFCTVSFIMCKA 300 IIKLLDCYDLLNKDPFSIMKENPPYGLHSYQFQDPVDKAAPGVNWVQLSD 350 FAIKIKCEDPLLLMG…	visual inspection found bipartite in SV40 position	180	DPPPQKKRRGD	12.5	SV40
deltapolyomaviorus	Giant panda polyomavirus	panda	2016463	UP000201543	>	A0A220IG74	MDAVLTKAEKDELMSLLGLAPTCYGNLPLMQQKYKKASLKFHPDKGGDEE 50 KMKRLNCLFGKVYNSFSDLRDQPRGSCSSQDIPTYGTREWEAWWEEFNHG 100 ADGDDLYCSENLDSSDEDYQPPPTSSSRRSPKTSTPPDSPSPPPTPSPSP 150 PTPSPSESSSSAGSGWSPPPNHPSSSPPTDPPPQKKRRGDSPNTTQQSFS 200 TPPKQKKMDSPEDFPEELRACLSNAVFSNKTVSAFLIYTTKEKGLVLVDS 250 LDKFDPNYRGCFKYRDYSLVFLLTPGKHRVTAVTNYCKQFCTVSFIMCKA 300 IIKLLDCYDLLNKDPFSIMKENPPYGLHSYQFQDPVDKAAPGVNWVQLSD 350 FAIKIKCEDPLLLMG…	visual inspection found bipartite in SV40 position	31	QQKYKKASLKFHPDKGGDEEKMKRLNC	5.1	N-term
deltapolyomaviorus	Canis lupus polyomavirus 1	wolf	2170403		>	A0A2S1CJS5	MDAVLTKAEKKELMSLLSLNAACYGNLPLMQQKYKKAALKFHPDKGGDEE 50 KMKRLNTLFSKVYQNLSDLRDQPRSSSSQDIPTYGTREWEQWWEEFNRTH 100 EDDLYCSENLDSSDDEYQPPKRKKGPKTSTPPSSPPPSGDHPPASPPPSP 150 VSSPKSPASSASGWSPPASNPPSPDSEAPPKKKRRDSPDPSQQSFSTPPK 200 QKKMDSPEDFPEILRPFLSNAVFSNKTVSAFLIYTTKEKGMVLVDNLDKF 250 DPNYRGCFKYNDYSIVFLLTPGKHRVTAVTNYCKQFCTVSFIMVKAIIKL 300 LDCYDTLNKEPFSIMMENPPYGLHSYQFQDPVEKPSPGVNWVQLSDFAIK 350 IKCEDPLLLMGFYLD…	visual visual inspection found an additional monopartite cNLS potentially forming a bipartite in SV40 position	118	QPPKRKKGPK	7	SV40
deltapolyomaviorus	Canis lupus polyomavirus 1	wolf	2170403		>	A0A2S1CJS5	MDAVLTKAEKKELMSLLSLNAACYGNLPLMQQKYKKAALKFHPDKGGDEE 50 KMKRLNTLFSKVYQNLSDLRDQPRSSSSQDIPTYGTREWEQWWEEFNRTH 100 EDDLYCSENLDSSDDEYQPPKRKKGPKTSTPPSSPPPSGDHPPASPPPSP 150 VSSPKSPASSASGWSPPASNPPSPDSEAPPKKKRRDSPDPSQQSFSTPPK 200 QKKMDSPEDFPEILRPFLSNAVFSNKTVSAFLIYTTKEKGMVLVDNLDKF 250 DPNYRGCFKYNDYSIVFLLTPGKHRVTAVTNYCKQFCTVSFIMVKAIIKL 300 LDCYDTLNKEPFSIMMENPPYGLHSYQFQDPVEKPSPGVNWVQLSDFAIK 350 IKCEDPLLLMGFYLD…	visual visual inspection found an additional monopartite cNLS potentially forming a bipartite in SV40 position	179	PPKKKRRDSP	13	SV40
deltapolyomaviorus	Canis lupus polyomavirus 1	wolf	2170403		>	A0A2S1CJS5	MDAVLTKAEKKELMSLLSLNAACYGNLPLMQQKYKKAALKFHPDKGGDEE 50 KMKRLNTLFSKVYQNLSDLRDQPRSSSSQDIPTYGTREWEQWWEEFNRTH 100 EDDLYCSENLDSSDDEYQPPKRKKGPKTSTPPSSPPPSGDHPPASPPPSP 150 VSSPKSPASSASGWSPPASNPPSPDSEAPPKKKRRDSPDPSQQSFSTPPK 200 QKKMDSPEDFPEILRPFLSNAVFSNKTVSAFLIYTTKEKGMVLVDNLDKF 250 DPNYRGCFKYNDYSIVFLLTPGKHRVTAVTNYCKQFCTVSFIMVKAIIKL 300 LDCYDTLNKEPFSIMMENPPYGLHSYQFQDPVEKPSPGVNWVQLSDFAIK 350 IKCEDPLLLMGFYLD…	visual visual inspection found an additional monopartite cNLS potentially forming a bipartite in SV40 position	7	KAEKKELMSLLSLNAACYGNLPLMQQKYKKA	6.2	N-term
deltapolyomaviorus	MW polyomavirus	human	1203539	UP000113150	>	I6UY22	MDRVLSRDEVKELMALLSLNVAAWGNIPLMQYKYRQACLKLHPDKGGDGE 50 KMKRLNELFSKMYTTIEKLRREGEVYFPAKGNPTYGTPEWDQWWEEFNRG 100 WDEDLSCNESFAPSDEEEPGPSQSASQTANDTNTPKKRPRDSSSNSTCTP 150 PKRPRNFNPVDFPEVLLEFLSNAIFSNKTLNSFVLYTTREKGQFLYEKVP 200 LKFKAMFYSLHEFDGDSLLFLLLSGKHRVSAIKNYCSNLCTVSFLLVKGC 250 LKAYECYYALCKTPFKLIKQSQEHGLSKTDFCEEEKDKVVNWQQICEFAV 300 EVQCEDPLLLMGMLLDFAKDVEGCSKCEQKKLKHHYKFHEAQNINSKLFK 350 DCKNQKTICQQATDW…	visual inspection found bipartite in SV40 position	134	TPKKRPRDS	6	SV40
deltapolyomaviorus	MW polyomavirus	human	1203539	UP000113150	>	I6UY22	MDRVLSRDEVKELMALLSLNVAAWGNIPLMQYKYRQACLKLHPDKGGDGE 50 KMKRLNELFSKMYTTIEKLRREGEVYFPAKGNPTYGTPEWDQWWEEFNRG 100 WDEDLSCNESFAPSDEEEPGPSQSASQTANDTNTPKKRPRDSSSNSTCTP 150 PKRPRNFNPVDFPEVLLEFLSNAIFSNKTLNSFVLYTTREKGQFLYEKVP 200 LKFKAMFYSLHEFDGDSLLFLLLSGKHRVSAIKNYCSNLCTVSFLLVKGC 250 LKAYECYYALCKTPFKLIKQSQEHGLSKTDFCEEEKDKVVNWQQICEFAV 300 EVQCEDPLLLMGMLLDFAKDVEGCSKCEQKKLKHHYKFHEAQNINSKLFK 350 DCKNQKTICQQATDW…	visual inspection found bipartite in SV40 position	149	TPPKRPRNFNPVDF	6	SV40
deltapolyomaviorus	STL polyomavirus	human	1277649	UP000116215	>	A0A142FHB4	MDQALSRAEAKELMGLLGLPEDSWGNVPLITYRFRQKSKIYHPDKGGNEE 50 TMKRMTELYSRMQNTLQNLRSSNENENMYPPGGQYGTPAWEQWWEEFNQP 100 FEDDLTCNESFNCSDDEGTSASQKRKFPDSSTQNSTPPKKNKPADPTDFP 150 AELETFLSHAVFSNKTSNCFCIYTTMEKGNELYTVIGPKFKSMFISCHSY 200 NTCCLLFMILAGKHRVSALKNFCSALCSISFVLVKSCLKPYECYYRMCSS 250 PFSVTKQSRPEGLSQAEFMEQENSKPTVNWQQICEFAVQFNCEDPLLLMG 300 IYLDFSESPDNCEKCRTELKHHNQFHEKEHNNAKLFRDSKTQKTLCQQAC 350 DWVCAKRRVLILEST…	visual inspection found bipartite in SV40 position		/		/
deltapolyomaviorus	Human polyomavirus 6	human	746830	UP000119412	>	D6QWG6	MDRLLAREEVRELMDLIGLSMACWGNLPLMQQKIRLACKKYHPDKGGDPE 50 KMQRLNVLKEKLNATLRDQMSSSPTWCFSSEVRPPPQYGSPGWEQWWADF 100 NRGWDDEDLYCDEHLSASEEEDNVDPGEGNSQDSKYSCTPPKKRKPNPAP 150 NDFPSCLHDYLSHATLGNKCYTCFVSYTTLEKWETLYDKLQSAFNAVFTG 200 AYKCNDNTGAILYCITPRRHRVSAMLNALSKCCTISFLLIKAVLKSAECY 250 MALQGDEFTVIQESRAEGLHSYDFQEGSKKEECDWNQVASFASDTDLTDC 300 LALLGYYIEFANDPASCMKCKKGVKVHKHHEVHFHNAQLFKAAKNQKSIA 350 QQACDRVAAQRRVLM…		140	PPKKRKPNP	9	SV40
deltapolyomaviorus	Human polyomavirus 7	human	746831	UP000113085	>	D6QWI6	MDKLLGRDEVKELMELIGLNMACWGNLPLIQHKVRLASKKYHPDKGGDPQ 50 KMQRLNVLKDKLEATLRDQRSGSPMWHYSSDEVRPPPPYGSPAWDKWWQD 100 FNKGWDEDLYCTEELSSSDEEEPASSASVNPEEGCSQDSKYSATPPKQKK 150 PNPAPQDFPECLSEFLSHATLGNKCYTCFLCYTTYEKSMLLYEKLGVEFN 200 ALFIGAYNCVDGSGALVFFISGSRHRVSAILNACKKHCTVSFIMVKAVLK 250 NAECYKALQDSKFAVLRESKEGGLHSYDFQEASKKDDCDWNFVADFAADM 300 ELTDVLLIMGYYMEFATEPSLCPKCLKSVKAHQHHEKHWANAKLFKTAKN 350 QKGIAQQAADRVLAA…	visual inspection found monopartite in SV40 position		/		/
deltapolyomaviorus	Raccoon-associated polyomavirus 2	racoon	1978920	UP000201136	>	A0A1W5X9V9	MDTVLSKAEKEELMSLLELAPACYGNFPLMQQKYKKASLKLHPDKGGDEE 50 KMKRLNSLFSKVVTSLAELRDQPRSFSSQDIPTYGTREWEQWWEEFNGEE 100 DDLYCSETIDSSDEEYQPSSGSPRSPRASTPEPCPPSSPPTPPPPSPTPA 150 ADPASPASSGRSSPLLHTPPPETPNNNKRKKSPPSASQQSFSTPPKQKKM 200 DAPLDFPEELRPFLSSAVFSNKTVSAFLIYTTKEKGLVLVDSLEKFDPNY 250 RGCFKYKEYSLVFLLTPGKHRVSAVTNYCKQFCTVSFIMCKAIIKLLDCY 300 DTLCKEPFHILKENPMFGLCSSQFQDPSEKGTPSVNWVQLSEFAIQIKCE 350 DPLLLMGFYLDFATP…	visual inspection found monopartite in SV40 position identical to HPyV7 and bipartite NLS in SV40 position		/		/
deltapolyomaviorus	Quebec polyomavirus	human	2506584		>	A0A499WH03	MDRLLSRDEVNELMQLIGLSMSNWGNLPLIQHKVREACKKHHPDKGGDPE 50 KMQRLNVLKDKFAATMRDQSSGNPIWHFSSEEVRPPPPYGTPEWDKWWHD 100 FNRGWDEDLYCTEELSASDEEQTAEDPEEGCSQNSKYSATPPKQRKPNPA 150 PQDFPECINEYLSHATLGNKCYNCFVCYTTMEKSLMLYDKLNNEFNALFI 200 GNYKCNDGSGSIVYMITGSRHRPSAILNASKKYCTVSFSLVKAVLKNAEC 250 YKALQGPNFTVIRESREGGLHSYDFQEASKKDDCDWNAVAEFALANDLTD 300 PLLIMGYYLEFAAEPSLCQKCKKGVKAHKCHELQWSNAKLFKSAKNQRGI 350 ATQAADRVLSARRVM…	visual inspection found monopartite in SV40 position		/		/
epsylonpolyomavirus	Bovine polyomavirus 1	cow	1561702	UP000113624	>	A0A0S2SW02	MELTSEEYEELRGLLGTPDIGNADTLKKAFLKACKVHHPDKGGNEEAMKR 50 LLYLYNKAKIAASATTSQVPEYGTSQWEQWWEEFNQGFDEQDLHCDEELE 100 PSDNEEENPAGSQAPGSQATPPKKPRTSPDFPEVLKEYVSNALFTNRTYN 150 CFIIFTTAEKGKELYPCIQAAYKCTFIALYMYNGDSVLYIITVGKHRVNA 200 MENLCSKKCTVSFLQAKGVLKPQEAYNVCCTFELISQNIQGGLPSSFFNP 250 VQEEEKSVNWKLISEFACSIKCTDPLLLMALYLEFTTAPEACKVCDNPRR 300 LEHRRHHTKDHTLNALLFQDSKTQKTICNQACDTVLAKRRLDMKTLTRNE 350 LLVQRWQGLFQEMED…		120	TPPKKPRTSPDF	8	SV40
epsylonpolyomavirus	Capra aegagrus polyomavirus 1	goat	2170409		>	A0A2S1CJJ2	MELTSEEYEELRGLLGTPDLGNAEILKKAFLKACKVHHPDKGGNEEAMKR 50 LLHLYNKAKTSVTSTTSQVPEYGTSQWEQWWADFNEDFDSQDLHCDEELE 100 PSDTEGEDIPAGSQAPGSQATPPKKPRTAPDFPEVLKEYVSHALFTNRTY 150 NCFIIFTTAEKGKELYPCIQAAYKCTFIALYMYNGDSVLYIITVGKHRVN 200 AMENLCSKKCTVSFLQAKGVLKPQEAYNVCCTFDLVSQNIQGGLPSSFFN 250 PVQEEEKSVNWKLISEFACSIKCTDPLLLMALYLEFTSAPEACKVCDNPR 300 RQEHRRHHNKDHTVNALLFQDSKTQKTICNQACDTVLAKRRLDMKTLTRT 350 ELLVQRWQGLFQEMD…		121	TPPKKPRTAPDF	6	SV40
epsylonpolyomavirus	Potamochoerus porcus polyomavirus 1	bushpig	2170410	UP000290434	>	A0A2S1CJK5	MELSPEECEELQGLLGIADIGNKEELKKAFLKACKVHHPDKGGDENAMKR 50 LLFLYNKAKQSSSPSWNGTQVPEYGTSQWDKWWENFNEQDLHCDEEFEPS 100 DEDSPQEGPTASQATPPKAKRSRTTPQFPEELKDYVSNALFSNRTYNCFV 150 VYTTGEKGKELYPCILSVYKCTFLGLFNYRGDALLYAVTPGKHRVNAIEH 200 LCSKKCVVSFVQVKGVLKPHEAYKACCQDPFEMVQQNIEGGLPSSFFNPH 250 EEEDKGVNWKLVAEFACDVKCTDPLLLMALYLEFVTPPSVCKVCDNPRRQ 300 QHRRHHSKDHHNNAVLFQDSKTQRTICAQACDLVMAKRRLNCKTMTRQEL 350 LEQRWEELFEEMEDI…		116	PPKAKRSRTTPQF	9.5	SV40
epsylonpolyomavirus	Potamochoerus porcus polyomavirus 1	bushpig	2170410	UP000290434	>	A0A2S1CJK5	MELSPEECEELQGLLGIADIGNKEELKKAFLKACKVHHPDKGGDENAMKR 50 LLFLYNKAKQSSSPSWNGTQVPEYGTSQWDKWWENFNEQDLHCDEEFEPS 100 DEDSPQEGPTASQATPPKAKRSRTTPQFPEELKDYVSNALFSNRTYNCFV 150 VYTTGEKGKELYPCILSVYKCTFLGLFNYRGDALLYAVTPGKHRVNAIEH 200 LCSKKCVVSFVQVKGVLKPHEAYKACCQDPFEMVQQNIEGGLPSSFFNPH 250 EEEDKGVNWKLVAEFACDVKCTDPLLLMALYLEFVTPPSVCKVCDNPRRQ 300 QHRRHHSKDHHNNAVLFQDSKTQRTICAQACDLVMAKRRLNCKTMTRQEL 350 LEQRWEELFEEMEDI…		334	VMAKRRLNCK	5	middle
gammapolyomavirus	Goose hemorrhagic polyomavirus	goose	208491	UP000163303	>	Q80FI2	MSFREIAELREMLSLPPHASYEDIKAAYRRAALMFHPDKGGDEEKMKRLN 50 YLMERAREYKPEEDLFCDEELSSSEEEDVPGPSTNATAEDSGYASFTSRG 100 YTSTDAGGQPGSPPHTQEGQGKTFSTPPKGPRDIPLPDAVESCLLAKKSI 150 QSCPEVHLLITSNSKLQELQPLILQHFSTKGYVTAQWAGGYAFMLIILAN 200 STRVSTLINFCCKHCTVSPYVVRGVKKHCLQKLLDVFNVSPEIEITVSQL 250 SADSCSDRQFNYALLNDFACKHKHTDALLLLAIYKRLSVPQEECADCQSQ 300 KENLCFGQLKRKWYGGHLDDHGIHHNNAKLFLQLKDQKRVCQGAVDCVLA 350 EKRFKSQTMSRNEQF…		307	GQLKRKWYGG	5	middle
gammapolyomavirus	Goose hemorrhagic polyomavirus	goose	208491	UP000163303	>	Q80FI2	MSFREIAELREMLSLPPHASYEDIKAAYRRAALMFHPDKGGDEEKMKRLN 50 YLMERAREYKPEEDLFCDEELSSSEEEDVPGPSTNATAEDSGYASFTSRG 100 YTSTDAGGQPGSPPHTQEGQGKTFSTPPKGPRDIPLPDAVESCLLAKKSI 150 QSCPEVHLLITSNSKLQELQPLILQHFSTKGYVTAQWAGGYAFMLIILAN 200 STRVSTLINFCCKHCTVSPYVVRGVKKHCLQKLLDVFNVSPEIEITVSQL 250 SADSCSDRQFNYALLNDFACKHKHTDALLLLAIYKRLSVPQEECADCQSQ 300 KENLCFGQLKRKWYGGHLDDHGIHHNNAKLFLQLKDQKRVCQGAVDCVLA 350 EKRFKSQTMSRNEQF…		267	DFACKHKHTDALLLLAIYKRLSVP	6.5	middle
gammapolyomavirus	Budgerigar fledgling disease virus (BFPyV) (Aves polyomavirus 1)	parrot	1891747	UP000134051	>	P13894	MASLRRLTELLCLPVTATAADIKTAYRRTALKYHPDKGGDEEKMKELNTL 50 MEEFRETEGLRADETLEDSDPEPEESGYATFENVSVPDIDGAFFKLMKLK 100 KCMQTYFSVNERRKQQSCPDCHLLITSITKMPQLKAHLYEHFGIKGHIVA 150 HWTGIALLVLQLEKPTRISTVHNFCKKYCTISICSVRGIKKNCVHALIKT 200 LLDVPGLDLEECSIDMNVVDEKQFMHAMLYDYAVQIDCTDALLLLAIYKR 250 LAQPTDKCPECQKDKDTVKRKRSTHIDDHPRHQHNASLFLHIKDQKRLCQ 300 CAVDAVLAEKRFRSATMTRDERLKERFRTVLRNIQELLDGETEAIDDFVT 350 AILLFNMLFPDVDVI…		375	NPPKRRYYI	5	middle
gammapolyomavirus	Corvus monedula polyomavirus 1	crow	1891748	UP000127404	>	Q20HY2	MANNMRADIAELRQLLDLPKTASYEKIKAAYRRKALMYHPDKGGDEEKMK 50 RLNQLMDVARKYDFSAETLQCEETLYSSDEEDVSPGPSQRPEDTGYESFS 100 ASFTDSGPAPEAAGGCSGSPPPTPGSGSFSTPPKSQREICLPADVEACLL 150 AAKSIQSCPEGHLVVTTHQKLQELQSSLLNHFDTAGHLVCKWGTDFAIML 200 IILTTGTRISTVLNFCKKHCTVSPLCVRGLKKHCLQKLVEIFTNSPNYVV 250 TDNALGKETLAGPFNYALLNDYACKQNISDALFLLAVYKRMSVNPDECKD 300 CKEDRENSSLQRLKRRRPGGHLEDHATHHMNAKMFLQLREQKRACQEAVD 350 AVLAERRFKTLTMTR…		311	QRLKRRRPGG	13	middle
gammapolyomavirus	Corvus monedula polyomavirus 1	crow	1891748	UP000127404	>	Q20HY2	MANNMRADIAELRQLLDLPKTASYEKIKAAYRRKALMYHPDKGGDEEKMK 50 RLNQLMDVARKYDFSAETLQCEETLYSSDEEDVSPGPSQRPEDTGYESFS 100 ASFTDSGPAPEAAGGCSGSPPPTPGSGSFSTPPKSQREICLPADVEACLL 150 AAKSIQSCPEGHLVVTTHQKLQELQSSLLNHFDTAGHLVCKWGTDFAIML 200 IILTTGTRISTVLNFCKKHCTVSPLCVRGLKKHCLQKLVEIFTNSPNYVV 250 TDNALGKETLAGPFNYALLNDYACKQNISDALFLLAVYKRMSVNPDECKD 300 CKEDRENSSLQRLKRRRPGGHLEDHATHHMNAKMFLQLREQKRACQEAVD 350 AVLAERRFKTLTMTR…		25	EKIKAAYRRKALMYHPDKGGDEEKMKRLN	5.1	N-term
gammapolyomavirus	Butcherbird polyomavirus	butcherbird	1394033	UP000129085	>	V5K6X6	MSCKEIRELRELLGLPPHASYDDIKAAYRKQALMYHPDKGGDEEKMKRLN 50 CLMDKAKEYDFSAEAANSPLFCDESSLSSSDEEDVPAQGSSRPGDDSGLG 100 ASFSAGFTDSGPASQSFGGQPGSPPPTPGSGSFSTPPKSQREITLPADIE 150 ACLLAAKSVQSCPEVHLLVTTYAKLQDLQSSLLQHFDCKAYLVAKWEGGL 200 AFFVMQLDTTARISTISNFCKKHCTVSPFIVRGVKKHFLQKLLDVVSKLE 250 NVEICFSNLNLDGNMDKQFNYALLNDFACKHNISDTLLLLATYKRFSVLT 300 EECADCLTAKENITVEQAKKRKLGGHLDDHQEHHSNAKLFLQLREQKRAC 350 QGAVDAVLAERRYLT…		316	EQAKKRKLG	6.5	middle
gammapolyomavirus	Butcherbird polyomavirus	butcherbird	1394033	UP000129085	>	V5K6X6	MSCKEIRELRELLGLPPHASYDDIKAAYRKQALMYHPDKGGDEEKMKRLN 50 CLMDKAKEYDFSAEAANSPLFCDESSLSSSDEEDVPAQGSSRPGDDSGLG 100 ASFSAGFTDSGPASQSFGGQPGSPPPTPGSGSFSTPPKSQREITLPADIE 150 ACLLAAKSVQSCPEVHLLVTTYAKLQDLQSSLLQHFDCKAYLVAKWEGGL 200 AFFVMQLDTTARISTISNFCKKHCTVSPFIVRGVKKHFLQKLLDVVSKLE 250 NVEICFSNLNLDGNMDKQFNYALLNDFACKHNISDTLLLLATYKRFSVLT 300 EECADCLTAKENITVEQAKKRKLGGHLDDHQEHHSNAKLFLQLREQKRAC 350 QGAVDAVLAERRYLT…		28	YRKQALMYHPDKGGDEEKMKRLNC	6.3	N-term
gammapolyomavirus	Erythrura gouldiae polyomavirus 1	parrot	2169903	UP000132730	>	A0A0K1ETR3	MSKADIAELRELLQLPKNASFEKIKAAYRKKALMYHPDKGGDEEKMKRLN 50 SLMEQAKTYDFSAENREEDLYCEESLSSEEEDVSPGPSQRAEDTGYGSFS 100 ASFNASGPSAEGPGGYAGSASPPPTPGSGSFSTPPKSQREIYLPADVESC 150 LLAAKSVQSCPEGHLVVTTHQKLQDLQASLLDHFDNTGYLTAKWEGGFSF 200 MLVLLTTGTRISTVHNFCKKHCTISPLCVRGVKKHCLQKLVDVITRMPCC 250 EVTANLLEREVCGEKGFNYAMLNEFACKNNISDALFLLALYKRLATDPDN 300 CSDCKTEKESTTLRQLKRKKPAGHVEAHKLHHINAKLFIQLREQKRACQG 350 AVDTVLAERRFKTLT…		314	RQLKRKKPAG	8	middle
gammapolyomavirus	Erythrura gouldiae polyomavirus 1	parrot	2169903	UP000132730	>	A0A0K1ETR3	MSKADIAELRELLQLPKNASFEKIKAAYRKKALMYHPDKGGDEEKMKRLN 50 SLMEQAKTYDFSAENREEDLYCEESLSSEEEDVSPGPSQRAEDTGYGSFS 100 ASFNASGPSAEGPGGYAGSASPPPTPGSGSFSTPPKSQREIYLPADVESC 150 LLAAKSVQSCPEGHLVVTTHQKLQDLQASLLDHFDNTGYLTAKWEGGFSF 200 MLVLLTTGTRISTVHNFCKKHCTISPLCVRGVKKHCLQKLVDVITRMPCC 250 EVTANLLEREVCGEKGFNYAMLNEFACKNNISDALFLLALYKRLATDPDN 300 CSDCKTEKESTTLRQLKRKKPAGHVEAHKLHHINAKLFIQLREQKRACQG 350 AVDTVLAERRFKTLT…		21	FEKIKAAYRKKALMYHPDKGGDEEKMKRLN	5	N-term
gammapolyomavirus	Lonchura maja polyomavirus 1 (Strain: 14534/2011)	sparrow	2169904	UP000240321	>	A0A1D8BJ34	MSTLQKLIDLLGLPPSATEADVRSAYRKKALEFHPDKGGDPERMKELNRL 50 MDEFRHSQSLFCDETLDSDTDDADSPGPSQRTSTPEPGTGKDSGHGTFEP 100 EAESSQASFGTPPKRGPPHIDLPASIEAYLLTAKSVQSCPDAHLIITTCN 150 KLQNLRPQLMTNFTTRGHIQAVWDSSYALFVILMERPTRVSTVANFCKKH 200 CTVSLCIVRGIKKNGVGALLRAMQEHPAIDVEQAIFPDDGPDEKQFNQAL 250 LNGYAISLDCTDALLLLAVYKRLARPVEACSDCAKERETAKRQRTSHLED 300 HPTHQKNAALFLGLRDQKRVCQCAVDGVLAEKRFKQATMTRNDRFMERLR 350 ETLKGIDKILHEDTE…			/		/
gammapolyomavirus	Adelie penguin polyomavirus	penguin	1590650	UP000165652	>	A0A0A7W5B8	MDPEQKVELIRLLEIPIGASKAEVQAAYRRQALRLHPDKGGCPEKMKQLN 50 ALYELYKKHPEDPLDTDPLYCEESELSDTDEEEEPDSAYASTQATRDTQQ 100 QDGTQRDQRETPGPSNHHCFTATGDRRPPGSPPAESQESSNSTFTSTPPK 150 SQPDVDLPDAIESCLLARKSSQSCPDCHLVITTVAKLTALKLPLQQQFTC 200 MGIVHANWGTYGLLVLMLNNPTRVSTIANFMKKNCTVSMYVCRGVKKGCM 250 PKLRDAIYGREDIKVEEDTLKVEATQENKQFCYSLINTFAEKKKIKDALM 300 LLAIYKRFSTDPETCQDCKQQKANTPFGKLKRKWIGGHCDDHVLQHNNAK 350 IFIQMKDQKRVCQGA…			/		/
gammapolyomavirus	Finch polyomavirus	sparrow	349564	UP000126417	>	A0A0A1DXM6	MSTLQKLIDLLGLPPSATEVDVRSAYRKKALEFHPDKGGDPERMKELNRL 50 MDEFRHSQSLFCDETLDSDSDDGDSPGPSQRTSTPEPGTGKDSGHGTFEP 100 EVNSWHAIDYDRAYCRLMELKWCLGSFFTSTERRKQGLTPEYLELKRRFQ 150 AVPWRAESSQASFGTPPKRGPPHIDLPASIEACLLTAKSVQSCPDAHLII 200 TTCNKLQNLRPQLMTNFTTRGHIQAVWDSSYALFVILMERPTRVSTVGNF 250 CKKHCTVSLCIVRGIKKNGVGALLRAMQEHPAIDVEQAIFPDDGPDEKQF 300 NQALLNGYAISLDCTDALLLLAVYKRLARPVEACPDCAKERETAKRQRTS 350 HLEDHPAHQKNAALF…			/		/
gammapolyomavirus	Canary polyomavirus	sparrow	881945	UP000105631	>	E0XL34	MDPGSYAELLSLLQLPRNADEKDISRAYRKVALQMHPDKGGNADKMKRLN 50 ALMEQYRSSGGSSGPDLSCNESPLQSEDEDPEEGPSGESAGSAGYFSQSM 100 PRSPPDPDRTPPNSGDSWGTPPKFGRTVVLPEIIEACLLNEKSVQSCPDV 150 HLVCTTQQKMESLRVRILQHFTTKGYLRANWREDLAFLLLHLQNTTRVST 200 IQNFLKKHCTISYCNSRGVKKNCFSKLCAAFKDLHDIDIVENHLAEEGPE 250 EKQFNYALLNEFAITKELTDALLLLAVYKRFATPIKECLECKASRRPKDN 300 PRNSHPTLHDDHHKNAKIFCTLKDQKRICQCAVDCVLAERRYKAYTMTRN 350 EMFAERVGAVLKGLA…			/		/
zetapolyomavirus	Delphinus delphis polyomavirus 1	dolphin	1891756	UP000203199	>	S5M0P9	MDCLTLDEQHELMDLLGLERTLYGCYGLMKTAFKSAALKYHPDKGGDPAL 50 MQRLNVLFGKLPEYGTPEWDAWWDNWNRHFNLYCDETLEESDEECEESQA 100 TPPKKKKRSNTPTDFPDCIKDFLSKAILSNRTLTTFAIYTTQEKGETLYQ 150 KLNDKYKCTFISRHSNGPFCILLLITPAKHRPNAILSFCSKFLTLSFCIV 200 RGVNNAVALYKRLLEDPFNLVEQTLEGGLEEELFSSAEDKSKIPQVNWKQ 250 VGDFAKDCDIDDPLLVMGYYLEFGSCVTSCIKCNSESDKIHVKHHKDHLE 300 NAKLFLDAKNQRNICAQACDGVLASRRLIMATSTRKHLFKLQLLKTFKKM 350 DECLNSENIKLYMAA…		102	PPKKKKRSNT	12	SV40
unclassified	Black sea bass polyomavirus 1	fish	1572341	UP000151067	>	A0A0A1C4T1	MSEQSNSFEPRLRRALGEHNNPRKSVRECWESWKAEQQKKPSLSEEDRGY 50 GDSMVTLYEQYTQVESALESFSASQTPEKVSPVQFDEPLREFLCSYAGFG 100 HSYILMCGEEKWKLYQRILFTYRTEDRFCLSRPTPKGTVYYISIKTRYRI 150 GGDVVWNKCRAIGADSWFELSAVKVKKYQQLKACAFGLGGVEITEGELEF 200 ERPPFKYALLEKYAVETGCCDPLLLLGDYLTFAEGLQSCDECYQEQLRVA 250 DPAGRVHSTRHEAHHQNAKGFKDVSNKKQQCVSACDVVCGCLRRRETKMS 300 RDDRFGARVLQGLENLVRGVTTEMLSAAFLLKAMLPFPITEFFDKVVKTM 350 VEAVPKKQGWVFRGP…		660	IAEYKRRHNIGSDGLPNKRRRC	13.3	C-term
unclassified	Rhynchobatus djiddensis polyomavirus 1	fish	2170102	UP000139727	>	A0A0B5CVG5	MDYYNALVILRRHLGIKRGATLSLQEIKEKRDEWLRKNHPDKGGSTESTQ 50 KVNAAWKCVSETGRDLHYFARDDGLSSDDDDDAGPSSSQSSQWTPPKRSM 100 TIPRYIRMHVEKPSPKCHRCYSLFVIICVREKLQPIMGVLADSGVEVNCQ 150 IIKQLGEFDAILFSTMGSHRASAIERGCGKCCRVAPYDVFIVHKNHKDPL 200 ISAMRDPQNEGDIAEDSFPTEDESVGDNFDMYKFTQFALKCGHCNMYLLM 250 GAYDNFSKLPDKCELCKTNKEHKENHIYHHRNACIFFRSKDKRKLASTAR 300 DSVIAEQAYTMHTSSRKDIFNRYFTETLDLCRKLEITAAISAAVACFIEI 350 CHGENAFKLLMDTLL…		11	RRHLGIKRGATLSLQEIKEKRDEWLRKNHPDK	5.7	N-term
unclassified	Sparus aurata polyomavirus 1	fish	1885927	UP000165577	>	A0A1B2RW84	MDIEEKLKRALGSCYTTQVSIPQNMELFRQAQMLEGSQPDEVYVQQVEEL 50 YKQWTEYTAVVQTIAATTPQKKGPDVFCNDQVQDYCDTVAAVVNQVVVMC 100 PTERAPHLSRIIFSYKNEDKFWVDMNDEKWGKVSYIGAKFRYRIVREVLF 150 RKFKMSCGADSWFVGMPVKSGKLSMVKSMLLGSSCVEKVVEGQLSFETPP 200 FLQAMLSLYAEEHSITDPFLLMGQYMRLADDSPEVCRFCDEERRMYRGIE 250 NESKRRHNRNHQKHYQNAKGFMALHNKKQACGFATDVVMGRLRVSSCGTR 300 DERFQASVLAHFGTLRDMGCLSQNQVAAAYLLANLIPVSVVHFYTYVVGR 350 MLKAVPKQQGFIFFG…		651	PKRPKRPCPF	5.5	C-term
unclassified	Trematomus bernacchii polyomavirus 1	fish	2218588	UP000289788	>	A0A2U9K628	MASSSTEVDLTNVFRGRLVSILGHHFHEDKSLFQCMQDFRKDESENSDGQ 50 VKLARGEDLWTGYQKAQSVLRDFAQHATPVPEGPVDFLNDEINDLCDVAA 100 CNASSLMIVCPSTLSNQLCRIIFHYKNDDRYRATLTHSKWGELTYAGCKT 150 RYKVNIDVVKKKLQASCGTKGWMLCLPALAGKYEMAKASVFGQSGITIIE 200 GKKNFEAPSFNQNQLCTFAKEHGITDCLLLLGKYASLGETLPESCVECFN 250 DKKRYGDDDSKQLHRPQHMKHYANSKGFRAVTNKKSLCTFATDEVHADLR 300 VKEREQTRPSIFQEATCKAIRELDRQGIDPGRVAAAVLLRHLMPVPVNHF 350 FEKIVKSIVDAVPKS…		645	EPACRKRCVFLDDESAETKKPLKKRKMR	11.3	C-term
unclassified	Trematomus pennellii polyomavirus 1	fish	2170103	UP000155591	>	A0A0E3JRJ3	MQQEYTADANGRNRNLLETNKEVAMANSTTFTSNVYASKLIKALGSSVFP 50 GATMEDNMITWNADMDALSFQDSQGNKEDRILLREKVNDLWKGYQAAEAV 100 LADFAPSDTPKMAGPVDFCADVTEFLDPDCTSASAYLFMAPASLYPQLMR 150 IAKGYRLDDYYGVAHTDEKWGEIQYFGFKTRYRLARHNMLRKMEASVSNK 200 GWVKGCPVVSKKFNMCKSHLFNCAGAEVTEGAVEFDVLCFNQQTLARYAK 250 DTGTCDPLLLMGDYMAFSGLVHACTQCHTERRRGGQCHATYHKEHQGNAK 300 AFMMVSNKKSAATNACDESCAVLRRASKLPRYDRLKDNMDIAMKVLEESD 350 ITNSQVAAAMLLSEL…		675	IPKKRKCPFI	13.5	C-term
	N.	%	% of cNLS	% of cNLS between of the LXCXE motif and the OBD
Total PyVs LTAs	115
LTAs with putative cNLS between of the LXCXE motif and the OBD identified by cNLS mapper	83	72.1739
LTAs with putative cNLS downstream of the ODB by identified by cNLS mapper	11	9.56522
LTAs with putative cNLS in central portion identified by cNLS mapper	5	4.34783
LTAs with putative cNLS upstrem of the LXCXE site identified by cNLS mapper	44	38.2609
LTAs with putative cNLS downstream of the LXCXE site identified only by visual inspection	10	8.69565
LTAs with no putative cNLS accoding to cNLS mapper	17	14.7826
LTAs with putative cNLS between of the LXCXE motif and the OBD identified by visual inspection	11	9.56522
LTAs with putative cNLSs	109	94.7826
LTAs with putative cNLS between of the LXCXE motif and the OBD identified by any method	94	81.7391	85.5
LTAs with putative bipartite cNLS between of the LXCXE motif and the OBD identified by any method	41	35.6522		18.1
LTAs with putative cNLSs exclusively in other positions rather than etween of the LXCXE motif and the OBD	15	13.0435	14.5
LTAs with no putative cNLSs	6	5.21739

## Sheet: Supplementary Table_II
Oligonucleotides
Code	Insert name	Sequence(5’-3’)
NLS1	SV40_LTA_C-FWD	CCCCCCAAAAAGAAAAGGAAGGTCTAAGTCGACA
NLS2	SV40_LTA_C-REV	GTCGACTTAGACCTTCCTTTTCTTTTTGGGGGGA
NLS3	STLP_LTA_C-FWD	CCCCCCAAGAAGAACAAGCCCGCCTAAAGATCTA
NLS4	STLP_LTA_C-REV	AGATCTTTAGGCGGGCTTGTTCTTCTTGGGGGGA
NLS5	MWP_LTA_C_FWD	CCCCCCAAGAGACCCAGGAACTTCTAAAGATCTA
NLS6	MWP_LTa_C_REV	AGATCTTTAGAAGTTCCTGGGTCTCTTGGGGGGA
NLS7	HP6_LTA_C-FWD	CCCCCCAAGAAGAGGAAGCCCAACTAAGTCGACA
NLS8	HP6_LTA_C-REV	GTCGACTTAGTTGGGCTTCCTCTTCTTGGGGGGA
NLS9	NJP_LTA_C-FWD	CCCCCCAAGCAGAAGAGGAAGAGCCCCTAAAAGCTTA
NLS10	NJP_LTA_C-REV	AAGCTTTTAGGGGCTCTTCCTCTTCTGCTTGGGGGGA
NLS11	HP9_LTA_C-FWD	CCCCCCAAGAGGAAGAAGCCCGAGTAAAGATCTA
NLS12	HP9_LTA_C-REV	AGATCTTTACTCGGGCTTCTTCCTCTTGGGGGGA
NLS13	MP_LTA_N-FWD	CCCGTGAGCAGGAAGAGACCCAGACCCGCCTAAAGATCTA
NLS14	MP_LTA_N-REV	AGATCTTTAGGCGGGTCTGGGTCTCTTCCTGCTCACGGGA
NLS15	LIP_LTA_M-FWD	CCCAAGAGGAACAGGAAGAACCAGTAAAAGCTTA
NLS16	LIP_LTA_M-REV	AAGCTTTTACTGGTTCTTCCTGTTCCTCTTGGGA
NLS17	STLP_LTA_Cb-FWD	AAGAGGAAGTTCCCCGACAGCAGCACCCAGAACAGCACCCCCCCCAAGAAGAACAAGCCCGCCTAAA
NLS18	STLP_LTA_Cb-REV	TTAGGCGGGCTTGTTCTTCTTGGGGGGGGTGCTGTTCTGGGTGCTGCTGTCGGGGAACTTCCTCTTA
NLS19	MWP_LTA_M-FWD	CCCAAGAAGAGACCCAGGGAGAGTTAAGTCGACA
NLS20	MWP_LTA_M-REV	GTCGACTTAACTCTCCCTGGGTCTCTTCTTGGGA
NLS21	NJP_LTA_M-FWD	CCCCCCAAGAGGAGGAGAGGCACCTAAAAGCTTA
NLS22	NJP_LTA_M-REV	AAGCTTTTAGGTGCCTCTCCTCCTCTTGGGGGGA
NLS23	LIP_LTA_N-FWD	CCCAGACCCAAGAAGAGGAGGAGCAACCTGTAAAAGCTTA
NLS24	LIP_LTA_N-REV	AAGCTTTTACAGGTTGCTCCTCCTCTTCTTGGGTCTGGGA
NLS25	LIP_LTA_C_FWD	CCCCCCAAGCAGAAGAGGTACAAGGAGTAAAAGCTTA
NLS26	LIP_LTA_C_REV	AAGCTTTTACTCCTTGTACCTCTTCTGCTTGGGGGGA
NLS27	MP_LTA_C-FwD	CCCCCCAAGAAGGCTAGAGAAGACTAAAGATCTA
NLS28	MP_LTA_C-REV	AGATCTTTAGTCTTCTCTAGCCTTCTTGGGGGGA
NLS29	KIP_LTA_C-FWD	CCCCCAAAGAAGAAACATGCTTAAGTCGACA
NLS30	KIP_LTA_C-REV	GTCGACTTAAGCATGTTTCTTCTTTGGGGGA
NLS31	TSP_LTA_CFWD	CCCCCCAAGCCCAAGAAGAGCAAGTACTAAAGATCTA
NLS32	TSP_LTA_CREV	AGATCTTTAGTACTTGCTCTTCTTGGGCTTGGGGGGA
NLS33	WUP_LTA_M-FWD	CCCACCAAGAGGACCAGGGAGTAAGTCGACA
NLS34	WUP_LTA_M-REV	GTCGACTTACTCCCTGGTCCTCTTGGTGGGA
NLS35	WUP_LTA_C-FWD	CCCCCCAAGAAGAAGAAGGACAACGCCTAAGTCGACA
NLS36	WUP_LTA_C-REV	GTCGACTTAGGCGTTGTCCTTCTTCTTCTTGGGGGGA
NLS37	HP7_LTA_C-FWD	CCCCCCAAGCAGAAGAAGCCCAACTAAGTCGACA
NLS38	HP7_LTA_C-REV	GTCGACTTAGTTGGGCTTCTTCTGCTTGGGGGGA
NLS39	HP12_LTA_M_FWD	CCACCTAAGAGGGGCAGGAACGGCGGCGGCTAAAGATCTA
NLS40	HP12_LTA_M_REV	AGATCTTTAGCCGCCGCCGTTCCTGCCCCTCTTAGGTGGA
NLS41	HP12_LTA_C_FWD	CCCCCCAAGAGCAAGAAGGCTAAGATGTAAAAGCTTA
NLS42	HP12_LTA_C_REV	AAGCTTTTACATCTTAGCCTTCTTGCTCTTGGGGGGA
NLS49	MWP_LTA_MC-FWD	CCCAAGAAGAGGCCTAGAGAGAGCAGCTCCAACAGCACATGCACCCCTCCAAAGCGGCCCAGAAACTTCTGAA
NLS50	MWP_LTA_MC-REV	TCAGAAGTTTCTGGGCCGCTTTGGAGGGGTGCATGTGCTGTTGGAGCTGCTCTCTCTAGGCCTCTTCTTGGGA
NLS51	KIP_LTA_Cb-FWD	AAGAGGAGCGCCCCCGAGGAGGAGCCCAGCTGCAGCCAGGCCACCCCCCCCAAGAAGAAGCACGCCTAAA
NLS52	KIP_LTA_Cb-REV	TTAGGCGTGCTTCTTCTTGGGGGGGGTGGCCTGGCTGCAGCTGGGCTCCTCCTCGGGGGCGCTCCTCTTA
NLS53	MCP_LTA_M-FWD	CCCTTCAGCCGGAAGAGAAAGTTTGGCGGCAGCTGAA
NLS54	MCP_LTA_M-REV	TCAGCTGCCGCCAAACTTTCTCTTCCGGCTGAAGGGA
NLS55	MCP_LTA_C-FWD	CCTCCGAAGCCGAAGAAAAACAGAGAGTGAA
NLS56	MCP_LTA_C-REV	TCACTCTCTGTTTTTCTTCGGCTTCGGAGGA
NLS117	KIP_LTA_Cb_mut_FWD	GCTGCTTCTGCCCCTGAGGAAGAACCTAGCTGCTCTCAGGCCACACCTCCTAAGAAGAAGCACGCCTTCGACGCCTGAA
NLS118	KIP_LTA_Cb_mut_REV	TCAGGCGTCGAAGGCGTGCTTCTTCTTAGGAGGTGTGGCCTGAGAGCAGCTAGGTTCTTCCTCAGGGGCAGAAGCAGCA
NLS119	STLP_LTA_Cb_mut_FWD	GCCGCTGCCTTTCCTGATAGCAGCACCCAGAATAGCACCCCTCCAAAGAAGAACAAGCCCGCCTGAA
NLS120	STLP_LTA_Cb_mut_REV	TCAGGCGGGCTTGTTCTTCTTTGGAGGGGTGCTATTCTGGGTGCTGCTATCAGGAAAGGCAGCGGCA
NLS121	WUP_LTA_MC_mut_FWD	CTGCCACAGCCGAGGATGATGAGGAACCTCAGTGCAGCCAGGCCACACCTCCTAAGAAGAAGAAGGACTGAA
NLS122	WUP_LTA_MC_mut_REV	TCAGTCCTTCTTCTTCTTAGGAGGTGTGGCCTGGCTGCACTGAGGTTCCTCATCATCCTCGGCTGTGGCAGCA
NLS134	MCPyV-NLS-m-278-FWD	CCCTTCAGCCGGACCAGAAAGTTTGGCGGCTCTTGAA
NLS135	MCPyV-NLS-m-278-REV	TCAAGAGCCGCCAAACTTTCTGGTCCGGCTGAAGGGA
NLS136	MCPyV-NLS-m-280-FWD	CCCTTCAGCCGGAAGAGAACATTTGGCGGCAGCTGAA
NLS137	MCPyV-NLS-m-280-REV	TCAGCTGCCGCCAAATGTTCTCTTCCGGCTGAAGGGA
NLS141	STPyVN-F	GGTGCTGCTGTCGGGGAACGCTGCCGCCTGGCTGGCGCTTGTGCCC
NLS142	STPyVN-R	GGGCACAAGCGCCAGCCAGGCGGCAGCGTTCCCCGACAGCAGCACC
NLS143	STPyVC-F	GGATCGGCGGGCTTGTTCGCCGCTGGAGGGGTGCTGTTCTG
NLS144	STPyVC-R	CAGAACAGCACCCCTCCAGCGGCGAACAAGCCCGCCGATCC
NLS145	KIPyVN-F	CTTCCTCAGGGGCGCTTGCCCCAGGGCTGCTAGGCATGC
NLS146	KIPyVN-R	GCATGCCTAGCAGCCCTGGGGCAAGCGCCCCTGAGGAAG
NLS147	KIPyVC-F	GCGTCAAAGGCGTGCTTCGCCGCAGGAGGTGTGGCCTGAGA
NLS148	KIPyVC-R	TCTCAGGCCACACCTCCTGCGGCGAAGCACGCCTTTGACGC
NLS149	MWPyVN-F	GAGCTGCTCTCTCTGGGCGCCGCCTTGGGTGTGTTGGTATC
NLS150	MWPyVN-R	GATACCAACACACCCAAGGCGGCGCCCAGAGAGAGCAGCTC
NLS151	MWPyVC-F	AAGTTCCGGGGCGCCGCTGGAGGTGTACAGGTGCTGTTGG
NLS152	MWPyVC-R	CCAACAGCACCTGTACACCTCCAGCGGCGCCCCGGAACTT
NLS153	MCPyV-K278T-F	CCAAATTTTCGCGTTCTTGAGAATGGAGGAGGGG
NLS154	MCPyV-K278T-R	CCCCTCCTCCATTCTCAAGAACGCGAAAATTTGG
NLS155	MCPyV-K280T-F	TTCGGGACCCCCCAAATGTTCGCTTTCTTGAGAAT
NLS156	MCPyV-K280T-R	ATTCTCAAGAAAGCGAACATTTGGGGGGTCCCGAA
NLS157	MCPyV-C-F	GTAGGAACAGGAGTTTCTCTGTTCGCTGCTGGCTTTGGTGGAGTGCTTGTAAA
NLS158	MCPyV-C-R	TTTACAAGCACTCCACCAAAGCCAGCAGCGAACAGAGAAACTCCTGTTCCTAC
NLS159	HPyV7-F	GAGCAGGATTGGGCTTCGCCTGCGCAGGAGGTGTGGCGCTGT
NLS160	HPyV7-R	ACAGCGCCACACCTCCTGCGCAGGCGAAGCCCAATCCTGCTC
NLS157	MCPyV-C-Fwd	GTAGGAACAGGAGTTTCTCTGTTCGCTGCTGGCTTTGGTGGAGTGCTTGTAAA
NLS158	MCPyV-C-Rev	TTTACAAGCACTCCACCAAAGCCAGCAGCGAACAGAGAAACTCCTGTTCCTAC

## Sheet: Supplementary Table_III
pGFP-NT TOPO clones
Code	Insert name	Sequence	Reaction (oligonucleotides)
588	/	/
575	SV40 LTA-NLS	125-PPKKKRKV-132	TOPO reaction pcDNA3.1/NT-GFP-TOPO™ x oligoes(1+2)
606	KIPyV LTA-NLSct	134-PPKKKHA-140	TOPO reaction pcDNA3.1/NT-GFP-TOPO™ x oligoes (29+30)
645	KIPyV LTA-NLSbip	119-KRSAPEEEPSCSQATPPKKKHA-140	TOPO reaction pcDNA3.1/NT-GFP-TOPO™ x oligoes (51+52)
608	WUPyV LTA-NLSm	122-PTKRTRE-128	TOPO reaction pcDNA3.1/NT-GFP-TOPO™ x oligoes (33+34)
609	WUPyV LTA-NLSct	140-PPKKKKDNA-148	TOPO reaction pcDNA3.1/NT-GFP-TOPO™ x oligoes (35+36)
695	WUPyV LTA-NLSbip	124-KRTREDDEEPQCSQATPPKKKD-146	TOPO reaction pcDNA3.1/NT-GFP-TOPO™ x oligoes (91+92)
576	STLPyV LTA-NLSct	137-PPKKNKPA-144	TOPO reaction pcDNA3.1/NT-GFP-TOPO™ x oligoes (3+4)
593	STLPyV LTA-NLSbip	124-KRKFPDSSTQNSTPPKKNKPA-144	TOPO reaction pcDNA3.1/NT-GFP-TOPO™ x oligoes (17+18)
610	HPyV7 LTA-NLSct	145-PPKQKKPN-152	TOPO reaction pcDNA3.1/NT-GFP-TOPO™ x oligoes (37+38)
592	LIPyV LTA-NLSm	211-PKRNRKNQ-218	TOPO reaction pcDNA3.1/NT-GFP-TOPO™ x oligoes (15+16)
600	LIPyV LTA-NLSnt	134-PRPKKRRSNL-143	TOPO reaction pcDNA3.1/NT-GFP-TOPO™ x oligoes (23+24)
601	LIPyV LTA-NLSct	236-PPKQKRYKE-244	TOPO reaction pcDNA3.1/NT-GFP-TOPO™ x oligoes (25+26)
647	MCPyV LTA-NLSm	274-PFSRKRKFGGS-284	TOPO reaction pcDNA3.1/NT-GFP-TOPO™ x oligoes (53+54)
648	MCPyV LTA-NLSct	299-PPKPKKNRE-307	TOPO reaction pcDNA3.1/NT-GFP-TOPO™ x oligoes (55+56)
579	NJPyV LTA-NLSct	206-PPKQKRKSP-214	TOPO reaction pcDNA3.1/NT-GFP-TOPO™ x oligoes (9+10)
595	NJPyV LTA-NLSm	181-PPKRRRGT-188	TOPO reaction pcDNA3.1/NT-GFP-TOPO™ x oligoes (21+22)
607	TSPyV LTA-NLSct	175-PPKPKKSKY-183	TOPO reaction pcDNA3.1/NT-GFP-TOPO™ x oligoes (31+32)
611	HPyV12 LTA-NLSm	169-PKRGRNGGG-177	TOPO reaction pcDNA3.1/NT-GFP-TOPO™ x oligoes (39+40)
612	HPyV12 LTA-NLSct	204-PPKSKKAKM-212	TOPO reaction pcDNA3.1/NT-GFP-TOPO™ x oligoes (41+42)
578	HPyV6 LTA-NLSct	140-PPKKRKPN-147	TOPO reaction pcDNA3.1/NT-GFP-TOPO™ x oligoes (7+8)
590	HPyV9 LTA-NLSct	171-PPKRKKPE-178	TOPO reaction pcDNA3.1/NT-GFP-TOPO™ x oligoes (11+12)
591	MPyV LTA-NLSnt	188-PVSRKRPRPA-197	TOPO reaction pcDNA3.1/NT-GFP-TOPO™ x oligoes (13+14)
602	MPyV LTA-NLSct	279-PPKKARED-286	TOPO reaction pcDNA3.1/NT-GFP-TOPO™ x oligoes (27+28)
577	MWPyV LTA-NLSct	150-PPKRPRNF-157	TOPO reaction pcDNA3.1/NT-GFP-TOPO™ x oligoes (5+6)
594	MWPyV LTA-NLSm	135-PKKRPRES-142	TOPO reaction pcDNA3.1/NT-GFP-TOPO™ x oligoes (19+20)
646	MWPyV LTA-NLSbip	135-PKKRPRESSSNSTCTPPKRPRNF-157	TOPO reaction pcDNA3.1/NT-GFP-TOPO™ x oligoes (49+50)
755	KIPyV LTA-NLSbip (K119A/R120A)	119-aaSAPEEEPSCSQATPPKKKHA-140	TOPO reaction pcDNA3.1/NT-GFP-TOPO™ x oligoes (117+118)
757	WUPyV LTA-NLSbip (K124A/R125A/K127A)	124-aaTaEDDEEPQCSQATPPKKKKD-146	TOPO reaction pcDNA3.1/NT-GFP-TOPO™ x oligoes (121+122)
756	STLyVP LTA-NLSbip (K124A/R125A/K126A)	124-aaaFPDSSTQNSTPPKKNKPA-144	TOPO reaction pcDNA3.1/NT-GFP-TOPO™ x oligoes (119+120)
807	MCPyV LTA-NLSm (K278T)	274-PFSRtRKFGGS-284	TOPO reaction pcDNA3.1/NT-GFP-TOPO™ x oligoes (134+135)
808	MCPyV LTA-NLSm (K280T)	274-PFSRKRtFGGS-284	TOPO reaction pcDNA3.1/NT-GFP-TOPO™ x oligoes (136+137)
pcDNA3-GFP clones
Code	Insert name	Sequence	Reaction
997	JCPyV LTA-NLS	126-PPKKKKKVED-9	synthesis (Genescript)
pDNR207 clones
Code	Insert name	Sequence	Reaction
763	HPyV7-Tag-CcN	116-SSSDEEEPASSASVNPEEGCSQDSKYSATPPKQKKPNP-153	BP reaction pDNR207 x PCR [(123+124)*724]
764	HPyV7-Tag-CcN (S116A/S117A/S118A)	116-aaaDEEEPASSASVNPEEGCSQDSKYSATPPKQKKPNP-153	BP reaction pDNR207 x PCR [(125+124)*779]
797	MCPyV-Tag-NLSbip	274-PFSRKRKFGGSRSSASSASSASFTSTPPKPKKNRE-307	BP reaction pDNR207 x PCR [(128+129)*772]
820	MCPyV-Tag-NLSbip (K278T)	274-PFSRtRKFGGSRSSASSASSASFTSTPPKPKKNRE-307	BP reaction pDNR207 x PCR [(129+138)*804]
821	MCPyV-Tag-NLSbip (K280T)	274-PFSRKRtFGGSRSSASSASSASFTSTPPKPKKNRE-307	BP reaction pDNR207 x PCR [(129+139)*804]
825	MCPyV-Tag-NLSbip (K278T/K303A/K304A)	274-PFSRtRKFGGSRSSASSASSASFTSTPPKPaaNRE-307	BP reaction pDNR207 x PCR [(138+140)*822]
826	MCPyV-Tag-NLSbip (K280T/K303A/K304A)	274-PFSRKRtFGGSRSSASSASSASFTSTPPKPaaNRE-307	BP reaction pDNR207 x PCR [(139+140)*823]
pDESTntYFP clones
Code	Insert name	Sequence	Reaction
779	HPyV7 Tag-CcN	116-SSSDEEEPASSASVNPEEGCSQDSKYSATPPKQKKPNP-153	LR reaction pDESTntYFP x 763
786	HPyV7 Tag-CcN (S116A/S117A/S118A)	116-aaaDEEEPASSASVNPEEGCSQDSKYSATPPKQKKPNP-153	LR reaction pDESTntYFP x 764
804	MCPyV Tag-NLSbip	274-PFSRKRKFGGSRSSASSASSASFTSTPPKPKKNRE-307	LR reaction pDESTntYFP x 797
822	MCPyV Tag-NLSbip (K278T)	274-PFSRtRKFGGSRSSASSASSASFTSTPPKPKKNRE-307	LR reaction pDESTntYFP x 820
823	MCPyV Tag-NLSbip (K280T)	274-PFSRKRtFGGSRSSASSASSASFTSTPPKPKKNRE-307	LR reaction pDESTntYFP x 821
828	MCPyV Tag-NLSbip (K278T/K303A/K304A)	274-PFSRtRKFGGSRSSASSASSASFTSTPPKPaaNRE-307	LR reaction pDESTntYFP x 825
844	MCPyV Tag-NLSbip (K280T/K303A/K304A)	274-PFSRKRtFGGSRSSASSASSASFTSTPPKPaaNRE-307	LR reaction pDESTntYFP x 826
LTA-eGFP fusion proteins expressing plasmids
Code	Plasmid name	Expression product	Source
722	pcLT206-eGFP	MCPyV LTA-eGFP	Gift by Patrick More
831	pcLT206-eGFP;K278T	MCPyV LTA-eGFP;K278T	Quikchange mutagenesis 722 x (153+154)
832	pcLT206-eGFP;K280T	MCPyV LTA-eGFP;K280T	Quikchange mutagenesis 722 x (155+156)
833	pcLT206-eGFP;K303A/K304A	MCPyV LTA-eGFP;K303A/K304	Quikchange mutagenesis 722 x (157+158)
869	pcLT206(K278T/K303A/K304A)-eGFP	MCPyV LTA-eGFP;K278T/K303A/K304	Quikchange mutagenesis 833 x (153+154)
870	pcLT206(K280T/K303A/K304A)-eGFP	MCPyV LTA-eGFP;K280T/K303A/K304	Quikchange mutagenesis 833 x (155+156)
724	HPyV7 LTA-eGFP	HPyV7 LTA-eGFP	synthesis, Vector Builder
829	HPyV7 LTADNLS-eGFP;K147A/K149A	HPyV7 LTA-eGFP;K147A/K149A	Quikchange mutagenesis 722 x (156+160)
811	pEGFP-N1 STLPyV LTA	STLPyV LTA-eGFP	synthesis, BioFab research
845	pEGFP-N1 STLPyV-LTADNLS;K124A/R125A/K126	STLPyV LTA-eGFP;K124A/R125A/K126	Quikchange mutagenesis 811 x (141+142)
823	pEGFP-N1 KIPyV LTA	KIPyV LTA-eGFP	synthesis, BioFab research
849	pEGFP-N1 KIPyV-LTADNLS;K119A/R120A	KIPyV-LTA-eGFP;K119A/R120A	Quikchange mutagenesis 813 x (145+146)
812	pEGFP-N1 MWPyV LTA	MWPyV LTA-eGFP	synthesis, BioFab research
850	pEGFP-N1 MWPyV LTADNLS_m;K152A/R153A	MWPyV-LTA-eGFP;K152A/R153A	Quikchange mutagenesis 812 x (151+152)
846	pEGFP-N1 MWPyV LTADNLS_ct;K137A/R138A	MWPyV-LTA-eGFP;K137A/R138A	Quikchange mutagenesis 812 x (149+150)
851	pEGFP-N1 MWPyV LTADNLSbip;K137A/R138A;K152A/R153A	MWPyV-LTA-eGFP;K137A/R138A;K152A/R153A	Quikchange mutagenesis 846 x (151+152)
